# Supplementary material for: Chemical synthesis of C6-tetrazole ᴅ-mannose building blocks and access to a bioisostere of mannuronic acid 1-phosphate
Source: publisher site journal article supplement (doi:10.3762/bjoc.17.110), 2021-07-05

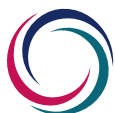

## Supporting Information

for

### **Chemical synthesis of C6-tetrazole D-mannose building blocks and access to a bioisostere of mannuronic acid 1-phosphate**

Eleni Dimitriou and Gavin J. Miller

*Beilstein J. Org. Chem.* **2021**, *17*, 1527–1532. [doi:10.3762/bjoc.17.110](https://doi.org/10.3762/bjoc.17.110)

**Detailed experimental protocols and characterisation data;  
spectral NMR data ( $^1\text{H}$ ,  $^{13}\text{C}$ ,  $^{31}\text{P}$  and HSQC NMR for  
compounds 2–5, 7–14, 16–18, 20 and 21)**

The following pages contain representative supporting information and data.

**S1. General experimental**

**S2. Experimental procedures for compounds 2–21**

**S3. HMBC spectrum for N1-protected tetrazole 11**

**S4. References**

**S5. Spectral Data:  $^1\text{H}$ ,  $^{13}\text{C}$ ,  $^{31}\text{P}$  and HSQC NMR for compounds 2–5, 7–14, 16–18, 20 and 21**

## S1. General experimental

All reagents and solvents which were available commercially were purchased from Acros, Alfa Aesar, Fisher Scientific, Sigma Aldrich or TCI. All reactions in non-aqueous solvents were conducted in oven dried glassware with a magnetic stirring device under an inert atmosphere of nitrogen passed through a drying column using a vacuum manifold. Solvents were purified by passing through activated alumina columns and used directly from a Pure Solv-MD solvent purification system and were transferred under nitrogen. Reactions were followed by thin layer chromatography (TLC) using Merck silica gel 60F254 analytical plates (aluminium support) and were developed using short wave UV radiation (245 nm) and 5% sulfuric acid in methanol/ $\Delta$ . Purification via flash column chromatography was conducted manually using Sigma Aldrich silica gel 60 (0.043–0.063 mm) under a positive pressure of compressed air or via automation using a Büchi Reveleris X2 with pre-packed silica cartridges. Purification via strong ion exchange (SAX) chromatography was conducted on a Bio-Rad Biologic LP system using a Bio-Scale Mini UNOsphere Q (strong anion exchange) cartridge (column volume = 5 mL): flow rate (3.0 mL/min), 0  $\rightarrow$  100% 1.0 M  $\text{NH}_4\text{HCO}_3$  over 33 min. Optical activities were recorded on an automatic Rudolph Autopol I or Bellingham and Stanley ADP430 polarimeter (concentration in g/100mL).  $^1\text{H}$  NMR spectra were recorded at 400 MHz,  $^{13}\text{C}$  NMR spectra at 100 MHz and  $^{31}\text{P}$  NMR spectra at 161 MHz respectively using Bruker AV-III spectrometers.  $^1\text{H}$  NMR resonances were assigned with the aid of gDQCOSY.  $^{13}\text{C}$  NMR resonances were assigned with the aid of gHSQCAD. Coupling constants are reported in Hertz. Chemical shifts ( $\delta$ , in ppm) are standardised against the deuterated solvent peak. NMR data were analysed using Mestrenova or iNMR software.  $^1\text{H}$  NMR splitting patterns were assigned as follows: br. s (broad singlet), s (singlet), d (doublet), dd (doublet of doublets), ddd (doublet of doublet of doublets), app. t (apparent triplet), t (triplet), quartet (q) or m (multiplet and/or multiple resonances). HRMS (ESI) were obtained on Agilent 6530 Q-TOF, LQT Orbitrap XL1 or Waters (Xevo, G2-XS TOF or G2-S ASAP) Micromass LCT spectrometers using a methanol mobile phase in positive/negative ionisation modes, as appropriate.

## S2. Experimental procedures for compounds 2-21

### S2.1. Compound 2

To a stirred solution of **1** (100 mg, 0.21 mmol, 1.0 equiv), PyBOP (280 mg, 0.53 mmol, 2.5 equiv) and DIPEA (75  $\mu$ L,  $d = 0.742$ , 0.43 mmol, 2.0 equiv) in  $\text{CH}_2\text{Cl}_2$  (2 mL), was added 3-aminopropionitrile (24  $\mu$ L,  $d = 0.952$ , 0.32 mmol, 1.5 equiv) in  $\text{CH}_2\text{Cl}_2$  (0.1 mL) at 0 °C. The mixture was left stirring for 40 min. and was diluted with  $\text{CH}_2\text{Cl}_2$  (10 mL). The organic layer was washed 1.0 M aq. HCl (2  $\times$  10 mL), sat. aq.  $\text{NaHCO}_3$  solution (2  $\times$  10 mL) and brine (10 mL), dried over  $\text{Na}_2\text{SO}_4$ , filtered and concentrated under reduced pressure. Purification using silica gel flash column chromatography, eluting with EtOAc/toluene (0/100, 5/95, 10/90, 20/80) afforded **2** as a white solid (51 mg, 0.1 mmol, 47%).  $R_f$  0.29 (EtOAc/toluene, 3/7);  $[\alpha]_D^{22} +56.4$  (c. 7.5,  $\text{CHCl}_3$ ); mp: 102-105 °C;  **$^1\text{H NMR}$**  (400 MHz;  $\text{CDCl}_3$ )  $\delta$  7.40 – 7.29 (15 H, m, Ar-H), 6.87 (1 H, t,  $J = 6.1$  Hz,  $\text{C(O)N(H)CH}_2\text{CH}_2\text{C}\equiv\text{N}$ ), 5.45 (1 H, d,  $J = 1.5$  Hz,  $\text{H}_1$ ), 4.88 (1 H, d,  $J = 12.0$  Hz,  $\text{CH}_2\text{Ph}$ ), 4.72 (1 H, d,  $J = 12.0$  Hz,  $\text{CH}_2\text{Ph}$ ), 4.68 (1 H, d,  $J = 12.0$  Hz,  $\text{CH}_2\text{Ph}$ ), 4.64 (1 H, d,  $J = 12.0$  Hz,  $\text{CH}_2\text{Ph}$ ), 4.53 (1 H, d,  $J = 9.8$  Hz,  $\text{H}_5$ ), 4.38 (1 H, s, C4-OH), 4.26 (1 H, app. t,  $J = 9.5$  Hz,  $\text{H}_4$ ), 3.94 (1 H, dd,  $J = 2.8, 1.8$  Hz,  $\text{H}_2$ ), 3.77 (1 H, dd,  $J = 9.3, 3.0$  Hz,  $\text{H}_3$ ), 3.64 (1 H, td,  $J = 12.6, 6.2$  Hz,  $\text{C(O)N(H)CH}_2\text{CH}_2\text{C}\equiv\text{N}$ ), 3.39 (1 H, ddt,  $J = 13.8, 7.8, 5.9$  Hz,  $\text{C(O)N(H)CH}_2\text{CH}_2\text{CN}$ ), 2.66 (1 H, dd,  $J = 11.7, 5.0$  Hz,  $\text{C(O)N(H)CH}_2\text{CH}_2\text{CN}$ ), 2.61 – 2.51 (1 H, m,  $\text{C(O)N(H)CH}_2\text{CH}_2\text{C}\equiv\text{N}$ );  **$^{13}\text{C NMR}$**  (101 MHz;  $\text{CDCl}_3$ )  $\delta$  172.1 ( $\text{C(O)N(H)CH}_2\text{CH}_2\text{C}\equiv\text{N}$ ), 138.4 ( $\text{C}_q$ ), 137.8 ( $\text{C}_q$ ), 132.8 ( $\text{C}_q$ ), 132.4, 129.4, 128.5, 128.4, 128.3, 128.0, 127.8, 127.7, 117.4 ( $\text{C(O)N(H)CH}_2\text{CH}_2\text{C}\equiv\text{N}$ ), 86.8 ( $\text{C}_1$ ), 78.5 ( $\text{C}_3$ ), 77.2 ( $\text{C}_2$ ), 73.3 ( $\text{CH}_2\text{Ph}$ ), 73.1 ( $\text{CH}_2\text{Ph}$ ), 70.9 ( $\text{C}_5$ ), 69.8 ( $\text{C}_4$ ), 35.1 ( $\text{C(O)N(H)CH}_2\text{CH}_2\text{C}\equiv\text{N}$ ), 18.3 ( $\text{C(O)N(H)CH}_2\text{CH}_2\text{C}\equiv\text{N}$ ); **HRMS** ( $\text{ES}^+$ )  $m/z$  [Found:  $(\text{M}+\text{NH}_4)^+$  536.2217  $\text{C}_{29}\text{H}_{34}\text{N}_3\text{O}_5\text{S}$  requires  $(\text{M}+\text{NH}_4)^+$ , 536.2219]; **IR**  $\nu_{\text{max}}/\text{cm}^{-1}$  3401 (w, N-H<sub>amide</sub>), 2249 (w,  $\text{C}\equiv\text{N}$ ), 1655, 1530 (s,  $\text{C}=\text{O}_{\text{amide}}$ ), 1496, 1454 (m,  $\text{C}=\text{C}_{\text{aromatic}}$ ), 1102 (C-N).

#### S2.1.1. Elimination byproduct 3

Elimination by-product **3** was isolated from the crude mixture containing **2** and as a colourless oil (46 mg, 90  $\mu$ mol, 44%).  $R_f$  0.32 (EtOAc/toluene, 3/7);  $[\alpha]_D^{22} +72.0$  (c. 7.5,  $\text{CHCl}_3$ );  **$^1\text{H NMR}$**  (400 MHz;  $\text{CDCl}_3$ )  $\delta$  7.49 – 7.28 (15 H, m, Ar-H), 6.73 (1 H, t,  $J = 6.2$  Hz,  $\text{C(O)N(H)CH}_2\text{CH}_2\text{C}\equiv\text{N}$ ), 6.23 (1 H, dd,  $J = 3.5, 0.9$  Hz,  $\text{H}_4$ ), 5.59 (1 H, d,  $J = 5.3$  Hz,  $\text{H}_1$ ), 4.70 (1 H, d,  $J = 12.1$  Hz,  $\text{CH}_2\text{Ph}$ ), 4.69 (1 H, d,  $J = 12.0$  Hz,  $\text{CH}_2\text{Ph}$ ), 4.64 (1 H, d,  $J = 12.1$  Hz,  $\text{CH}_2\text{Ph}$ ), 4.60 (1 H, d,  $J = 11.9$   $\text{CH}_2\text{Ph}$ ), 4.29 (1 H, app. t,  $J = 3.8$  Hz,  $\text{H}_3$ ), 3.85 (1 H, ddd,  $J = 5.1, 4.1, 0.9$  Hz,  $\text{H}_2$ ), 3.62 – 3.43 (2 H, m,  $\text{C(O)N(H)CH}_2\text{CH}_2\text{C}\equiv\text{N}$ ), 2.69 – 2.52 (2 H, m,  $\text{C(O)N(H)CH}_2\text{CH}_2\text{C}\equiv\text{N}$ );  **$^{13}\text{C NMR}$**  (101 MHz;  $\text{CDCl}_3$ )  $\delta$  161.5 ( $\text{C(O)N(H)CH}_2\text{CH}_2\text{C}\equiv\text{N}$ ), 143.6 ( $\text{C}_5$ ), 137.8 ( $\text{C}_q$ ), 137.5 ( $\text{C}_q$ ), 133.4 ( $\text{C}_q$ ), 131.9, 129.4, 128.6, 128.5, 128.5, 128.1, 128.0, 127.9, 127.8, 117.9 ( $\text{C(O)N(H)CH}_2\text{CH}_2\text{C}\equiv\text{N}$ ), 106.1 ( $\text{C}_4$ ), 85.1 ( $\text{C}_1$ ), 72.81 ( $\text{C}_2$ ), 72.5 ( $\text{CH}_2\text{Ph}$ ), 71.2 ( $\text{CH}_2\text{Ph}$ ), 68.3 ( $\text{C}_3$ ), 35.6 ( $\text{C(O)N(H)CH}_2\text{CH}_2\text{C}\equiv\text{N}$ ), 18.2 ( $\text{C(O)N(H)CH}_2\text{CH}_2\text{C}\equiv\text{N}$ ); **HRMS** ( $\text{ES}^+$ )  $m/z$  [Found:

(M+NH<sub>4</sub>)<sup>+</sup> 518.2115 C<sub>29</sub>H<sub>32</sub>N<sub>3</sub>O<sub>4</sub>S requires (M+NH<sub>4</sub>)<sup>+</sup>, 518.2114]; **IR**  $\nu_{\text{max}}$ /cm<sup>-1</sup> 3354 (w, N-H<sub>amide</sub>), 2248 (w, C≡N), 1655, 1517 (s, C=O<sub>amide</sub>), 1454 (m, C=C<sub>aromatic</sub>), 1057 (C-N).

## S2.2. Compound 4

In a manner similar to [1]: to a mixture of **2** (50 mg, 0.1 mmol, 1.0 equiv), imidazole (20 mg, 0.29 mmol, 3.0 equiv) and DMAP (5.9 mg, 50  $\mu$ mol, 0.5 equiv) in DMF (1 mL) was added TBDMSOTf (66  $\mu$ L, d = 1.151, 0.29 mmol, 3.0 equiv) dropwise. The reaction mixture was left stirring overnight at room temperature and was quenched with H<sub>2</sub>O (0.1 mL). The mixture was concentrated under reduced pressure, and the remaining crude was reconstituted in CH<sub>2</sub>Cl<sub>2</sub> (10 mL) and H<sub>2</sub>O (5 mL). The organic layer was washed, separated, dried over Na<sub>2</sub>SO<sub>4</sub>, filtered and concentrated under reduced pressure to furnish a colourless oil. Purification by silica gel flash column chromatography, eluting with EtOAc/hexane (0/100, 10/90, 20/80) afforded **4** as a white solid (50 mg, 79  $\mu$ mol, 80%). R<sub>f</sub> 0.46 (EtOAc/hexane, 1/2);  $[\alpha]_D^{26}$  +14.0 (c. 1.0, CHCl<sub>3</sub>); mp: 119-122 °C; **<sup>1</sup>H NMR** (400 MHz; CDCl<sub>3</sub>)  $\delta$  7.67 – 7.23 (15 H, m, Ar-H), 6.29 (1 H, t, *J* = 6.1 Hz, C(O)N(H)CH<sub>2</sub>CH<sub>2</sub>C≡N), 5.35 (1 H, d, *J* = 7.4 Hz, H<sub>1</sub>), 4.57 (1 H, d, *J* = 12.1 Hz, CH<sub>2</sub>Ph), 4.56 (1 H, d, *J* = 11.8 Hz, CH<sub>2</sub>Ph), 4.50 (1 H, app. t, *J* = 3.4 Hz, H<sub>4</sub>), 4.49 (1 H, d, *J* = 11.8 Hz, CH<sub>2</sub>Ph), 4.47 (1 H, d, *J* = 12.0 Hz, CH<sub>2</sub>Ph), 4.19 (1 H, d, *J* = 3.9 Hz, H<sub>5</sub>), 3.81 (1 H, dd, *J* = 7.3, 2.6 Hz, H<sub>2</sub>), 3.56 (1 H, dd, *J* = 5.2, 2.6 Hz, H<sub>3</sub>), 3.28 (1 H, dq, *J* = 13.1, 6.6 Hz, C(O)N(H)CH<sub>2</sub>CH<sub>2</sub>C≡N), 3.19 (1 H, td, *J* = 13.2, 6.5 Hz, C(O)N(H)CH<sub>2</sub>CH<sub>2</sub>C≡N), 2.31 (1 H, dt, *J* = 16.6, 6.6 Hz, C(O)N(H)CH<sub>2</sub>CH<sub>2</sub>C≡N), 2.25 – 2.12 (1 H, m, C(O)N(H)CH<sub>2</sub>CH<sub>2</sub>C≡N), 0.80 (9 H, s, C(CH<sub>3</sub>)<sub>3</sub>), 0.00 (3 H, s, Si(CH<sub>3</sub>)<sub>2</sub>), -0.08 (3 H, s, Si(CH<sub>3</sub>)<sub>2</sub>); **<sup>13</sup>C NMR** (101 MHz; CDCl<sub>3</sub>)  $\delta$  169.3 (C(O)N(H)CH<sub>2</sub>CH<sub>2</sub>C≡N), 137.9 (C<sub>q</sub>), 137.8 (C<sub>q</sub>), 133.5 (C<sub>q</sub>), 133.0, 129.2, 128.4, 128.3, 128.2, 128.1, 128.0, 127.9, 127.8, 117.6 (C(O)N(H)CH<sub>2</sub>CH<sub>2</sub>C≡N), 84.1 (C1), 77.5 (C5), 74.2 (C2), 72.4 (CH<sub>2</sub>Ph), 72.4 (CH<sub>2</sub>Ph), 68.7 (C4), 35.3 (C(O)N(H)CH<sub>2</sub>CH<sub>2</sub>C≡N), 25.8 (C(CH<sub>3</sub>)<sub>3</sub>), 18.0 (C(CH<sub>3</sub>)<sub>3</sub>), -4.8 (Si(CH<sub>3</sub>)<sub>2</sub>), -5.0 (Si(CH<sub>3</sub>)<sub>2</sub>); **HRMS** (ES<sup>+</sup>) *m/z* [Found: (M+NH<sub>4</sub>)<sup>+</sup> 650.3082 C<sub>35</sub>H<sub>48</sub>N<sub>3</sub>O<sub>5</sub>SSi requires (M+NH<sub>4</sub>)<sup>+</sup>, 650.3078]; **IR**  $\nu_{\text{max}}$ /cm<sup>-1</sup> 3217 (w, N-H<sub>amide</sub>), 2255 (w, C≡N), 1678, 1659 (s, C=O<sub>amide</sub>), 1496, 1455 (m, C=C<sub>aromatic</sub>), 1243 (s, Si-C), 1096 (s, C-N), 1068 (s, Si-O).

## S2.3. Compound 5

Propionitrile **4** (60 mg, 0.11 mmol, 1.0 equiv) was dissolved in toluene (10 mL) and TMSN<sub>3</sub> (84  $\mu$ L, d = 0.872, 0.64 mmol, 6.0 equiv) and Bu<sub>2</sub>SnO (11 mg, 43  $\mu$ mol, 0.4 equiv) were added. The mixture was heated to 120 °C and stirred for 16 h. Upon completion, the mixture was cooled down to room temperature, diluted with EtOAc (50 mL) and washed with 0.1 M aq. HCl solution (50 mL). The organic layer was dried over Na<sub>2</sub>SO<sub>4</sub>, filtered and concentrated under reduced pressure. Purification of this crude material by silica gel flash column chromatography, eluting with MeOH/CH<sub>2</sub>Cl<sub>2</sub> (0/100, 1/99, 2/98) afforded **5** as a brown oil (34 mg, 56  $\mu$ mol, 51%). R<sub>f</sub> 0.71 (MeOH/CH<sub>2</sub>Cl<sub>2</sub>, 1/2);  $[\alpha]_D^{22}$  +88.7 (c. 1.75, CHCl<sub>3</sub>); **<sup>1</sup>H NMR** (400 MHz; CDCl<sub>3</sub>)  $\delta$  7.47 – 7.26 (15 H, m, Ar-H), 5.64 (1 H, d,

$J = 8.9$  Hz,  $H_5$ ), 5.54 (1 H, d,  $J = 1.8$  Hz,  $H_1$ ), 4.74 (1 H, d,  $J = 11.7$  Hz,  $CH_2Ph$ ), 4.73 (1 H, d,  $J = 11.8$  Hz,  $CH_2Ph$ ), 4.69 (1 H, d,  $J = 11.7$  Hz,  $CH_2Ph$ ), 4.65 (1 H, d,  $J = 11.8$  Hz,  $CH_2Ph$ ), 4.41 (1 H, app. t,  $J = 8.8$  Hz,  $H_4$ ), 4.09 (1 H, app. t,  $J = 2.6$  Hz,  $H_2$ ), 3.84 (1 H, dd,  $J = 8.6, 2.8$  Hz,  $H_3$ ), 0.78 (9 H, s,  $C(CH_3)_3$ ), 0.00 (3 H, s,  $Si(CH_3)_2$ ), -0.41 (3 H, s,  $Si(CH_3)_2$ );  **$^{13}C$  NMR** (101 MHz;  $CDCl_3$ )  $\delta$  155.8 ( $C_q$  tetrazole), 137.6 ( $C_q$ ), 137.1 ( $C_q$ ), 132.8 ( $C_q$ ), 132.2, 129.2, 128.6, 128.5, 128.3, 128.1, 128.0, 86.8 ( $C_1$ ), 79.7 ( $C_3$ ), 76.5 ( $C_2$ ), 73.3 ( $CH_2Ph$ ), 72.7 ( $CH_2Ph$ ), 71.0 ( $C_4$ ), 68.5 ( $C_5$ ), 25.6 ( $C(CH_3)_3$ ), 17.9 ( $C(CH_3)_3$ ), -4.3 ( $Si(CH_3)_2$ ), -5.9 ( $Si(CH_3)_2$ ); **HRMS** ( $ES^+$ )  $m/z$  [Found:  $(M+H)^+$  605.2628  $C_{32}H_{41}N_4O_4SSi$  requires  $(M+H)^+$ , 605.2618].

## S2.4. Compound 7

### S2.4.1. Phenyl 2,3-di-*O*-benzyl-6-*O*-benzoyl-1-thio- $\alpha$ -D-mannopyranoside

To a stirred solution of **6**<sup>1</sup> (1.0 g, 2.21 mmol, 1.0 equiv), pyridine (357  $\mu$ L,  $d = 0.978$ , 4.42 mmol, 2.0 equiv), DMAP (81 mg, 0.7 mmol, 0.3 equiv) in  $CH_2Cl_2$  (10 mL) was added  $BzCl$  dropwise (269  $\mu$ L,  $d = 1.211$ , 2.32 mmol, 1.05 equiv) at 0 °C. The reaction was left stirring overnight at room temperature, and diluted with  $CH_2Cl_2$  (15 mL). The mixture was washed with 1.0 M aq.  $HCl$  (10 mL), sat. aq.  $NaHCO_3$  (10 mL) and brine (10 mL). The organic layer was dried over  $MgSO_4$ , filtered and concentrated under reduced pressure to afford the crude product. Purification by Reveleris® automated silica gel flash column chromatography (liquid injection onto column), eluting with  $EtOAc$ /hexane (0/100, 5/95 and 10/90) afforded phenyl 2,3-di-*O*-benzyl-6-*O*-benzoyl-1-thio- $\alpha$ -D-mannopyranoside as a colourless oil (1.1 g, 2.0 mmol, 90%).  $R_f$  0.37 ( $EtOAc$ /hexane, 1/2);  $[\alpha]_D^{22} +48.2$  (c. 7.5,  $CHCl_3$ );  **$^1H$  NMR** (400 MHz;  $CDCl_3$ )  $\delta$  8.03 – 7.19 (20 H, m, Ar-H), 5.65 (1 H, d,  $J = 1.3$  Hz,  $H_1$ ), 4.69 (1 H, d,  $J = 12.1$  Hz,  $CH_2Ph$ -attached to  $C_2$ ), 4.65 – 4.59 (2 H, m,  $H_{6a,b}$ ), 4.61 (1 H, d,  $J = 12.7$  Hz,  $CH_2Ph$ -attached to  $C_2$ ), 4.55 (1 H, d,  $J = 10.5$  Hz,  $CH_2Ph$ -attached to  $C_3$ ), 4.52 (1 H, d,  $J = 10.1$  Hz,  $CH_2Ph$ -attached to  $C_3$ ), 4.43 (1 H, dt,  $J = 9.6, 3.9$  Hz,  $H_5$ ), 4.15 (1 H, dd,  $J = 9.6$  Hz,  $H_4$ ), 4.04 (1 H, dd,  $J = 3.0, 1.6$  Hz,  $H_2$ ), 3.73 (1 H, dd,  $J = 9.5, 3.0$  Hz,  $H_3$ ), 2.64 (1 H, br. s,  $C_4-OH$ );  **$^{13}C$  NMR** (101 MHz;  $CDCl_3$ )  $\delta$  166.7 ( $C(O)Ph$ ), 137.8 ( $C_q$ ), 137.7 ( $C_q$ ), 134.1 ( $C_q$ ), 133.0 ( $C_q$ ), 131.5, 130.1, 129.8, 129.1, 128.6, 128.4, 128.3, 128.1, 128.0, 127.8, 127.5, 85.7 ( $C_1$ ), 79.6 ( $C_3$ ), 75.7 ( $C_2$ ), 72.1 ( $CH_2Ph$ ), 71.9 ( $CH_2Ph$ ), 71.7 ( $C_5$ ), 66.9 ( $C_4$ ), 64.1 ( $C_6$ ); **HRMS** ( $ES^+$ )  $m/z$  [Found:  $(M+NH_4)^+$  574.2257  $C_{33}H_{32}O_6SNH_4$  requires  $(M+NH_4)^+$ , 574.2258]; **IR**  $\nu_{max}/cm^{-1}$  3477 (br. s,  $C_4-OH$ ), 1718 (s,  $C=O_{ester}$ ), 1273 (s,  $C-O_{ester}$ ), 1070 (s,  $C-O_{ether}$ ), 1025 (s,  $C-OH$ ).

### S2.4.2. Phenyl 2,3-di-*O*-benzyl-4-*O*-*tert*-butyldimethylsilyl-6-*O*-benzoyl-1-thio- $\alpha$ -D-mannopyranoside

In a manner similar to [1]: To a mixture of phenyl 2,3-di-*O*-benzyl-6-*O*-benzoyl-1-thio- $\alpha$ -D-mannopyranoside (900 mg, 1.62 mmol, 1.0 equiv), imidazole (330 mg, 4.85 mmol, 3.0 equiv) and DMAP (99 mg, 0.81 mmol, 0.5 equiv) in  $DMF$  (10 mL) was added  $TBDMSOTf$  (1.1 mL,  $d = 1.151$ , 4.85 mmol, 3.0 equiv) dropwise. The reaction mixture

was left stirring overnight at room temperature and was quenched with H<sub>2</sub>O (2 mL). The mixture was concentrated under reduced pressure, and the remaining crude was reconstituted in CH<sub>2</sub>Cl<sub>2</sub> (50 mL) and H<sub>2</sub>O (30 mL). The organic layer was washed, separated, dried over MgSO<sub>4</sub>, filtered and concentrated under reduced pressure to furnish a colourless oil. Purification by silica gel flash column chromatography, eluting with EtOAc/hexane (0/100, 5/95, 10/90) afforded phenyl 2,3-di-*O*-benzyl-4-*O*-*tert*-butyldimethylsilyl-6-*O*-benzoyl-1-thio- $\alpha$ -D- mannopyranoside, as a colourless oil (846 mg, 1.27 mmol, 78%). *R*<sub>f</sub> 0.75 (EtOAc/hexane, 1/2);  $[\alpha]_D^{26} +57.8$  (c. 1.37, CHCl<sub>3</sub>); **<sup>1</sup>H NMR** (400 MHz; CDCl<sub>3</sub>)  $\delta$  7.96 – 7.10 (20 H, m, Ar-H), 5.54 (1 H, d, *J* = 1.7, H<sub>1</sub>), 4.61 (1 H, dd, *J* = 11.6, 1.8 Hz, H<sub>6b</sub>), 4.57 (1 H, d, *J* = 12.0 Hz, CH<sub>2</sub>Ph), 4.57 (1 H, s, *J* = 11.9 Hz, CH<sub>2</sub>Ph), 4.52 (1 H, d, *J* = 11.8 Hz, CH<sub>2</sub>Ph), 4.50 (1 H, d, *J* = 12.0 Hz, CH<sub>2</sub>Ph), 4.39 (1 H, dd, *J* = 11.6, 5.8 Hz, H<sub>6a</sub>), 4.35 – 4.29 (1 H, m, H<sub>5</sub>), 4.19 (1 H, t, *J* = 9.1 Hz, H<sub>4</sub>), 3.91 (1 H, dd, *J* = 2.7, 2.0 Hz, H<sub>2</sub>), 3.61 (1 H, dd, *J* = 8.9, 2.9 Hz, H<sub>3</sub>), 0.82 (9 H, s, C(CH<sub>3</sub>)<sub>3</sub>), 0.00 (6 H, d, *J* = 1.5 Hz, Si(CH<sub>3</sub>)<sub>2</sub>); **<sup>13</sup>C NMR** (101 MHz; CDCl<sub>3</sub>)  $\delta$  166.4 (C(O)Ph), 138.1 (C<sub>q</sub>), 138.1 (C<sub>q</sub>), 132.8 (C<sub>q</sub>), 131.3 (C<sub>q</sub>), 130.1, 129.7, 129.0, 128.3, 128.3, 127.9, 127.6, 127.6, 127.5, 127.3, 85.7 (C1), 80.3 (C3), 76.2 (C2), 72.6 (C5), 72.1 (CH<sub>2</sub>Ph), 71.8 (CH<sub>2</sub>Ph), 68.2 (C4), 64.2 (C6), 26.0 (C(CH<sub>3</sub>)<sub>3</sub>), 18.2 (C(CH<sub>3</sub>)<sub>3</sub>), -3.8 (Si(CH<sub>3</sub>)<sub>2</sub>), -5.0 (Si(CH<sub>3</sub>)<sub>2</sub>); **HRMS** (ES<sup>+</sup>) *m/z* [Found: (M+NH<sub>4</sub>)<sup>+</sup> 688.3127 C<sub>39</sub>H<sub>50</sub>NO<sub>6</sub>SSi requires (M+NH<sub>4</sub>)<sup>+</sup>, 688.3123]; **IR**  $\nu_{\text{max}}$ /cm<sup>-1</sup> 1713 (s, C=O<sub>ester</sub>), 1276 (m, C-O<sub>ester</sub>), 1253 (m, Si-C), 1096 (s, Si-O), 1024 (m, C-O<sub>ether</sub>).

#### S2.4.3. Compound 7

In a manner similar to [1]: To a stirred solution of phenyl 2,3-di-*O*-benzyl-4-*O*-*tert*-butyldimethylsilyl-6-*O*-benzoyl-1-thio- $\alpha$ -D- mannopyranoside (800 mg, 1.19 mmol, 1.0 equiv) in anhydrous MeOH and THF (7 mL, 1/1 v/v), Na (14 mg, 0.60 mmol, 0.5 equiv) dissolved in anhydrous MeOH (2 mL) was added dropwise at room temperature. The mixture was stirred overnight, then neutralised with ion exchange Amberlite 120 (H<sup>+</sup>) resin (approximately 0.7 g, 10 min), filtered, and concentrated under reduced pressure. Purification by silica gel flash column chromatography, eluting with Et<sub>2</sub>O/hexane (0/100, 5/95, 10/90) afforded **7** as a colourless oil (596 mg, 1.07 mmol, 90%). *R*<sub>f</sub> 0.69 (EtOAc/hexane, 1/2);  $[\alpha]_D^{26} +81.3$  (c. 1.0, CHCl<sub>3</sub>); **<sup>1</sup>H NMR** (400 MHz; CDCl<sub>3</sub>)  $\delta$  7.35 – 7.13 (15 H, m, Ar-H), 5.37 (1 H, d, *J* = 1.8 Hz, H<sub>1</sub>), 4.51 (2 H, d, *J* = 12.5 Hz, CH<sub>2</sub>Ph), 4.49 (1 H, d, *J* = 11.8 Hz, CH<sub>2</sub>Ph), 4.44 (1 H, d, *J* = 11.9 Hz, CH<sub>2</sub>Ph), 4.02 – 3.96 (1 H, m, H<sub>4</sub>), 3.96 – 3.91 (1 H, m, H<sub>5</sub>), 3.82 (1 H, dd, *J* = 2.8, 2.0 Hz, H<sub>2</sub>), 3.72 (1 H, ddd, *J* 11.5, 6.6, 2.4 Hz, H<sub>6b</sub>), 3.64 (1 H, ddd, *J* = 11.6, 6.5, 5.2 Hz, H<sub>6a</sub>), 3.53 (1 H, dd, *J* = 8.4, 2.9 Hz, H<sub>3</sub>), 1.70 (1 H, t, *J* = 6.6 Hz, C6-OH), 0.78 (9 H, s, C(CH<sub>3</sub>)<sub>3</sub>), 0.00 (3 H, s, Si(CH<sub>3</sub>)<sub>2</sub>), -0.05 (3 H, s, Si(CH<sub>3</sub>)<sub>2</sub>); **<sup>13</sup>C NMR** (101 MHz; CDCl<sub>3</sub>)  $\delta$  138.1 (C<sub>q</sub>), 138.0 (C<sub>q</sub>), 134.0 (C<sub>q</sub>), 132.0, 129.1, 128.4, 128.3, 127.9, 127.7, 127.7, 127.6, 86.2 (C1), 80.4 (C3), 76.4 (C2), 74.8 (C5), 72.5 (CH<sub>2</sub>Ph), 72.0 (CH<sub>2</sub>Ph), 67.9 (C4), 62.2 (C6), 26.0 (C(CH<sub>3</sub>)<sub>3</sub>), 18.2 (C(CH<sub>3</sub>)<sub>3</sub>), -3.8 (Si(CH<sub>3</sub>)<sub>2</sub>), -4.9 (Si(CH<sub>3</sub>)<sub>2</sub>); **HRMS** (ES<sup>+</sup>) *m/z* [Found: (M+NH<sub>4</sub>)<sup>+</sup> 584.2875



C<sub>32</sub>H<sub>46</sub>NO<sub>5</sub>SSi requires (M+NH<sub>4</sub>)<sup>+</sup>, 584.2850]; IR  $\nu_{\text{max}}/\text{cm}^{-1}$  1454 (w, C=C<sub>aromatic</sub>), 1248 (m, C-Si), 1084 (s, Si-O).

## S2.5. C-6 oxime thioglycoside 8

### S2.5.1. C6-aldehyde thioglycoside intermediate

To a stirred solution of **7** (60 mg, 0.11 mmol, 1.0 equiv) in DMSO (1 mL) was added Et<sub>3</sub>N (44  $\mu$ L, d = 0.726, 0.32 mmol, 3.0 equiv) and sulfur trioxide pyridine complex (51 mg, 0.32 mmol, 3.0 equiv) at room temperature. The reaction mixture was left stirring for 1 h before it was diluted with EtOAc (30 mL) and H<sub>2</sub>O (20 mL). The whole was extracted with EtOAc (3  $\times$  15 mL) and the extracts were washed with H<sub>2</sub>O (6  $\times$  20 mL) and brine (20 mL). The organic layer was dried over Na<sub>2</sub>SO<sub>4</sub>, filtered and concentrated under reduced pressure. The crude aldehyde was obtained as a colourless oil (60 mg, 0.11 mmol, 98%) and was used immediately in the next step, without further purification. R<sub>f</sub> 0.684 (EtOAc/hexane, 1/2);  $[\alpha]_D^{22}$  -14.4 (c. 0.33, CHCl<sub>3</sub>); **<sup>1</sup>H NMR** (400 MHz; CDCl<sub>3</sub>)  $\delta$  9.77 (1 H, s, CHO), 7.56 – 7.25 (15 H, m, Ar-H), 5.56 (1 H, d, *J* = 6.4 Hz, H<sub>1</sub>), 4.57 (1 H, d, *J* = 11.9 Hz, CH<sub>2</sub>Ph), 4.52 (2 H, s, CH<sub>2</sub>Ph), 4.43 (1 H, d, *J* = 11.9 Hz, CH<sub>2</sub>Ph), 4.26 – 4.20 (2 H, m, H<sub>4</sub>, H<sub>5</sub>), 3.83 (1 H, dd, *J* = 6.2, 2.3 Hz, H<sub>2</sub>), 3.60 (1 H, dd, *J* = 5.8, 2.5 Hz, H<sub>3</sub>), 0.82 (9 H, s, C(CH<sub>3</sub>)<sub>3</sub>), 0.00 (3 H, s, Si(CH<sub>3</sub>)<sub>2</sub>), -0.07 (3 H, s, Si(CH<sub>3</sub>)<sub>2</sub>); **<sup>13</sup>C NMR** (101 MHz; CDCl<sub>3</sub>)  $\delta$  198.0 (CHO), 137.8 (C<sub>q</sub>), 137.6 (C<sub>q</sub>), 133.5 (C<sub>q</sub>), 132.4, 131.8, 129.0, 128.5, 128.4, 128.0, 127.9, 127.8, 127.5, 83.8 (C1), 81.15 (C5), 77.2 (C3), 73.8 (C2), 72.5 (CH<sub>2</sub>Ph), 72.3 (CH<sub>2</sub>Ph), 68.9 (C4), 25.7 (C(CH<sub>3</sub>)<sub>3</sub>), 18.0 (C(CH<sub>3</sub>)<sub>3</sub>), -4.6 (Si(CH<sub>3</sub>)<sub>2</sub>), -5.0 (Si(CH<sub>3</sub>)<sub>2</sub>); **HRMS** (ES<sup>+</sup>) *m/z* [Found: (M+NH<sub>4</sub>)<sup>+</sup> 582.2723 C<sub>32</sub>H<sub>44</sub>NO<sub>5</sub>SSi requires (M+NH<sub>4</sub>)<sup>+</sup>, 582.2704].

### S2.5.2. C-6 oxime thioglycoside 8

The crude C-6 aldehyde (4.5 g, 7.97 mmol, 1.0 equiv) was dissolved in THF (790 mL) and a solution of H<sub>2</sub>NOH·HCl (554 mg, 7.97 mmol, 1.0 equiv) dissolved in H<sub>2</sub>O (15 mL) was added dropwise. The mixture was cooled to 0 °C and a solution of Na<sub>2</sub>CO<sub>3</sub> (1.0 g, 9.56 mmol, 1.2 equiv) dissolved in H<sub>2</sub>O (9.5 mL) was added dropwise. The solution was slowly warmed to room temperature and stirred for 24 h. The mixture was diluted with H<sub>2</sub>O (30 mL) and then extracted with EtOAc (4  $\times$  300 mL). The organic layers were combined, dried over Na<sub>2</sub>SO<sub>4</sub>, filtered and concentrated under reduced pressure. The obtained crude oil was purified using silica gel flash column chromatography, eluting with Et<sub>2</sub>O/petroleum ether (0/100, 5/95, 10/90, 20/80) to furnish **8** as a colourless oil. *Cis* and *trans* (1/6.7) were isolated separately (major isomer: 2.82 g, 4.86 mmol, 71%, minor isomer: 416 mg, 0.72 mmol, 9%) and both were used in the next step; Major isomer R<sub>f</sub> 0.78; minor isomer R<sub>f</sub> 0.68; (EtOAc/petroleum ether, 1/2); major:  $[\alpha]_D^{22}$  +57.7 (c. 0.46, CHCl<sub>3</sub>); minor:  $[\alpha]_D^{22}$  +41.3 (c. 1.0, CHCl<sub>3</sub>); **<sup>1</sup>H NMR** (400 MHz; CDCl<sub>3</sub>) Major isomer  $\delta$  7.46 – 7.17 (16 H, m, Ar-H, HC=N), 5.40 (1 H, d, *J* = 1.8 Hz, H<sub>1</sub>), 4.58 (1 H, d, *J* = 10.5 Hz, CH<sub>2</sub>Ph), 4.57 (1 H, m, H<sub>5</sub>), 4.55 (1 H, d, *J* = 10.1 Hz, CH<sub>2</sub>Ph), 4.54 (1 H, d, *J* = 12.4



Hz, CH<sub>2</sub>Ph), 4.50 (1 H, d, *J* = 11.9 Hz, CH<sub>2</sub>Ph), 4.06 (1 H, app. t, *J* = 9.0 Hz, H<sub>4</sub>), 3.89 – 3.86 (1 H, m, H<sub>2</sub>), 3.59 (1 H, dd, *J* = 8.9, 2.9 Hz, H<sub>3</sub>), 0.81 (9 H, s, C(CH<sub>3</sub>)<sub>3</sub>), 0.00 (3 H, s, Si(CH<sub>3</sub>)<sub>2</sub>), -0.01 (3 H, s, Si(CH<sub>3</sub>)<sub>2</sub>); **<sup>13</sup>C NMR** (101 MHz; CDCl<sub>3</sub>) δ 149.3 (HC=N), 138.1 (C<sub>q</sub>), 137.9 (C<sub>q</sub>), 134.0 (C<sub>q</sub>), 131.9, 129.1, 128.4, 128.4, 127.9, 127.85, 127.8, 127.7, 127.6, 86.3 (C1), 79.8 (C3), 76.3 (C2), 72.5 (C5), 72.5 (CH<sub>2</sub>Ph), 72.2 (CH<sub>2</sub>Ph), 69.8 (C4), 25.8 (C(CH<sub>3</sub>)<sub>3</sub>), 18.1 (C(CH<sub>3</sub>)<sub>3</sub>), -4.0 (Si(CH<sub>3</sub>)<sub>2</sub>), -4.6 (Si(CH<sub>3</sub>)<sub>2</sub>); **HRMS** (ES<sup>+</sup>) *m/z* [Found: (M+NH<sub>4</sub>)<sup>+</sup> 597.2815 C<sub>32</sub>H<sub>45</sub>N<sub>2</sub>O<sub>5</sub>SSi requires (M+NH<sub>4</sub>)<sup>+</sup>, 597.2813].

## S2.6. C-6 nitrile thioglycoside 9

Oxime **8** (120 mg, 0.21 mmol, 1.0 equiv) was dissolved in dry acetonitrile (21 mL) and POCl<sub>3</sub> (19 μL, d = 1.645, 0.21 mmol, 1.0 equiv) was added at room temperature. The solution was stirred for 5 min. at room temperature, heated up to 65 °C and then stirred for 3 h. The reaction was quenched with sat. aq. NaHCO<sub>3</sub> solution (20 mL) and extracted with EtOAc (3 × 60 mL). The organic layers were combined, dried over Na<sub>2</sub>SO<sub>4</sub>, filtered and concentrated under reduced pressure. The crude product was purified using silica gel flash column chromatography, eluting with Et<sub>2</sub>O/petroleum ether (0/100, 5/95, 10/90, 20/80) to furnish **9** as a yellow oil (47 mg, 84 μmol, 40%). R<sub>f</sub> 0.90 (EtOAc/hexane, 1/2); [α]<sub>D</sub><sup>22</sup> +39.4 (c. 0.53, CHCl<sub>3</sub>); **<sup>1</sup>H NMR** (400 MHz; CDCl<sub>3</sub>) δ 7.44 – 7.21 (15 H, m, Ar-H), 5.45 (1 H, d, *J* = 3.0 Hz, H<sub>1</sub>), 4.76 (1 H, d, *J* = 8.3 Hz, H<sub>5</sub>), 4.60 (1 H, d, *J* = 11.9 Hz, CH<sub>2</sub>Ph), 4.58 (1 H, d, *J* = 12.1 Hz, CH<sub>2</sub>Ph), 4.55 (1 H, d, *J* = 12.1 Hz, CH<sub>2</sub>Ph), 4.53 (1 H, d, *J* = 12.0 Hz, CH<sub>2</sub>Ph), 4.21 (1 H, app. t, *J* = 8.2 Hz, H<sub>4</sub>), 3.84 (1 H, app. t, *J* = 2.9 Hz, H<sub>2</sub>), 3.49 (1 H, dd, *J* = 8.2, 2.9 Hz, H<sub>3</sub>), 0.89 (9 H, s, C(CH<sub>3</sub>)<sub>3</sub>), 0.18 (3 H, s, Si(CH<sub>3</sub>)<sub>2</sub>), 0.05 (3 H, s, Si(CH<sub>3</sub>)<sub>2</sub>); **<sup>13</sup>C NMR** (101 MHz; CDCl<sub>3</sub>) δ 137.5 (C<sub>q</sub>), 137.1 (C<sub>q</sub>), 132.9 (C<sub>q</sub>), 131.5, 129.4, 129.3, 129.1, 128.5, 128.5, 128.4, 128.2, 128.1, 128.0, 127.9, 127.9, 127.6, 127.2, 124.4, 117.0 (C≡N), 85.9 (C1), 78.8 (C3), 75.3 (C2), 72.6 (CH<sub>2</sub>Ph), 72.5 (CH<sub>2</sub>Ph), 69.4 (C4), 64.7 (C5), 25.8 (C(CH<sub>3</sub>)<sub>3</sub>), 18.0 (C(CH<sub>3</sub>)<sub>3</sub>), -4.1 (Si(CH<sub>3</sub>)<sub>2</sub>), -4.8 (Si(CH<sub>3</sub>)<sub>2</sub>); **HRMS** (ES<sup>+</sup>) *m/z* [Found: (M+NH<sub>4</sub>)<sup>+</sup> 579.2732 C<sub>32</sub>H<sub>43</sub>N<sub>2</sub>O<sub>4</sub>SSi requires (M+NH<sub>4</sub>)<sup>+</sup>, 579.2707].

### S2.6.1. 4-postion deprotected byproduct 10

Alcohol **10** was also isolated as a yellow oil (24 mg, 54 μmol, 26%) from the crude mixture containing **9**. R<sub>f</sub> 0.82 (EtOAc/hexane, 1/2); [α]<sub>D</sub><sup>22</sup> +15.4 (c. 0.95, CHCl<sub>3</sub>); **<sup>1</sup>H NMR** (400 MHz; CDCl<sub>3</sub>) δ 7.41 – 7.28 (15 H, m, Ar-H), 5.51 (1 H, d, *J* = 1.7 Hz, H<sub>1</sub>), 4.87 (1 H, d, *J* = 9.8 Hz, H<sub>5</sub>), 4.66 (1 H, d, *J* = 12.0 Hz, CH<sub>2</sub>Ph), 4.60 (1 H, d, *J* = 12.0 Hz, CH<sub>2</sub>Ph), 4.57 (1 H, d, *J* = 12.2 Hz, CH<sub>2</sub>Ph), 4.55 (1 H, d, *J* = 11.8 Hz, CH<sub>2</sub>Ph), 4.32 (1 H, app. t, *J* = 9.6 Hz, H<sub>4</sub>), 3.96 (1 H, dd, *J* = 2.7, 2.0 Hz, H<sub>2</sub>), 3.57 (1 H, dd, *J* = 9.3, 2.9 Hz, H<sub>3</sub>), 2.92 (1 H, br. s, C4-OH); **<sup>13</sup>C NMR** (101 MHz; CDCl<sub>3</sub>) δ 137.3 (C<sub>q</sub>), 137.2 (C<sub>q</sub>), 132.7 (C<sub>q</sub>), 131.5, 129.4, 128.7, 128.6, 128.3, 128.3, 128.1, 128.0, 128.0, 116.6 (C≡N), 86.6 (C1), 78.4 (C3), 75.4 (C2), 72.5 (CH<sub>2</sub>Ph), 72.4 (CH<sub>2</sub>Ph), 68.3 (C4), 63.1 (C3); **HRMS** (ES<sup>+</sup>) *m/z* [Found: (M+NH<sub>4</sub>)<sup>+</sup> 465.1857 C<sub>26</sub>H<sub>29</sub>N<sub>2</sub>O<sub>4</sub>S requires (M+NH<sub>4</sub>)<sup>+</sup>, 465.1843].

## S2.7. PMB-protected C-6 tetrazole thioglycosides **11** and **12**

To a stirred solution of **5** (130 mg, 0.21 mmol, 1.0 equiv) in DMF (2 mL) was added successively, KI (53 mg, 0.32 mmol, 1.5 equiv), K<sub>2</sub>CO<sub>3</sub> (44 mg, 0.32 mmol, 1.5 equiv) and PMBCl (58  $\mu$ L, d = 1.155, 0.43 mmol, 2.0 equiv). The reaction was left stirring for 4 h and was diluted with CH<sub>2</sub>Cl<sub>2</sub> (10 mL). The organic layer was washed with 10% aq. Na<sub>2</sub>S<sub>2</sub>O<sub>3</sub> solution (10 mL) and brine (10 mL), dried over MgSO<sub>4</sub>, filtered and concentrated under reduced pressure. The crude product was purified using silica gel flash column chromatography, eluting with acetone/toluene (1/250, 1/150, 1/100) to furnish isomers **11** and **12** (80 mg, 0.11 mmol, 53%) as oils.

### S2.7.1. Compound **11**

N1-regioisomer **11** was isolated as a yellow oil (42 mg, 58  $\mu$ mol, 28%). R<sub>f</sub> 0.42 (acetone/toluene, 1/50);  $[\alpha]_D^{22} +25.4$  (c. 0.53, CHCl<sub>3</sub>); **<sup>1</sup>H NMR** (400 MHz; CDCl<sub>3</sub>)  $\delta$  7.56 – 7.39 (16 H, m, Ar-H), 7.36 (2 H, d, *J* = 8.7 Hz, Ar-H PMB), 6.82 (2 H, d, *J* = 8.8 Hz, Ar-H PMB), 5.76 (1 H, d, *J* = 1.8 Hz, H<sub>1</sub>), 5.68 (1 H, d, *J* = 9.4 Hz, H<sub>5</sub>), 5.66 (1 H, d, *J* = 15.0 Hz, CH<sub>2</sub>Ph-PMB), 5.63 (1 H, d, *J* = 15.0 Hz, CH<sub>2</sub>Ph-PMB), 4.83 (1 H, d, *J* = 11.6 Hz, CH<sub>2</sub>Ph-attached to C2), 4.81 (1 H, d, *J* = 12.0 Hz, CH<sub>2</sub>Ph-attached to C3), 4.78 (1 H, d, *J* = 11.1 Hz, CH<sub>2</sub>Ph-attached to C2), 4.75 (1 H, d, *J* = 11.7 Hz, CH<sub>2</sub>Ph-attached to C3), 4.59 (1 H, app. t, *J* = 9.4 Hz, H<sub>4</sub>), 4.22 – 4.19 (1 H, m, H<sub>2</sub>), 3.87 (3 H, s, OCH<sub>3</sub>), 3.86 – 3.84 (1 H, m, H<sub>3</sub>), 0.79 (9 H, s, C(CH<sub>3</sub>)<sub>3</sub>), 0.00 (3 H, s, Si(CH<sub>3</sub>)<sub>2</sub>), -0.53 (3 H, s, Si(CH<sub>3</sub>)<sub>2</sub>); **<sup>13</sup>C NMR** (101 MHz; CDCl<sub>3</sub>)  $\delta$  159.7 (C<sub>q</sub> PMB), 152.0 (C<sub>q</sub> tetrazole), 137.8 (C<sub>q</sub>), 137.5 (C<sub>q</sub>), 133.5 (C<sub>q</sub>), 131.1 (C<sub>q</sub>), 129.9, 129.2, 128.5, 128.4, 128.0, 127.9, 127.8, 127.7, 125.7, 114.1, 86.5 (C1), 80.1 (C3), 76.4 (C2), 72.9 (CH<sub>2</sub>Ph-attached to C2), 72.1 (CH<sub>2</sub>Ph-attached to C3), 70.0 (C4), 67.7 (C5), 55.2 (CH<sub>2</sub>Ph PMB), 50.8 (OCH<sub>3</sub>), 25.6 (C(CH<sub>3</sub>)<sub>3</sub>), 17.8 (C(CH<sub>3</sub>)<sub>3</sub>), -4.5 (Si(CH<sub>3</sub>)<sub>2</sub>), -6.1 (Si(CH<sub>3</sub>)<sub>2</sub>); **<sup>13</sup>C-GATED** (101 MHz; CDCl<sub>3</sub>): 86.5 (<sup>1</sup>J<sub>C1-H1</sub> = 172 Hz, C1); **HRMS** (ES<sup>+</sup>) *m/z* [Found: (M+H)<sup>+</sup> 725.3177 C<sub>40</sub>H<sub>49</sub>N<sub>4</sub>O<sub>5</sub>Si requires (M+H)<sup>+</sup>, 725.3187].

### S2.7.2. Compound **12**

N1-regioisomer **12** was isolated as a yellow oil (38 mg, 52  $\mu$ mol, 25%). R<sub>f</sub> 0.48 (acetone/toluene, 1/50);  $[\alpha]_D^{22} +40.6$  (c. 0.86, CHCl<sub>3</sub>); **<sup>1</sup>H NMR** (400 MHz; CDCl<sub>3</sub>)  $\delta$  7.43 – 7.21 (18 H, m, Ar-H), 6.87 (2 H, d, *J* = 8.7 Hz, Ar-H PMB), 5.67 (1 H, d, *J* = 14.1 Hz, CH<sub>2</sub>Ph-PMB), 5.62 (1 H, d, *J* = 14.0 Hz, CH<sub>2</sub>Ph-PMB), 5.56 (1 H, d, *J* = 1.9 Hz, H<sub>1</sub>), 5.40 (1 H, d, *J* = 9.2 Hz, H<sub>5</sub>), 4.67 (1 H, d, *J* = 12.3 Hz, CH<sub>2</sub>Ph-attached to C2), 4.60 (1 H, app. t, *J* = 9.1 Hz, H<sub>4</sub>), 4.57 (1 H, d, *J* = 12.4 Hz, CH<sub>2</sub>Ph-attached to C2), 4.56 (1 H, d, *J* = 12.9 Hz, CH<sub>2</sub>Ph-attached to C3), 4.52 (1 H, d, *J* = 12.0 Hz, CH<sub>2</sub>Ph-attached to C3), 4.01 – 3.99 (1 H, m, H<sub>2</sub>), 3.79 (3 H, s, OCH<sub>3</sub>), 3.70 (1 H, dd, *J* = 8.9, 2.9 Hz, H<sub>3</sub>), 0.50 (9H, s, C(CH<sub>3</sub>)<sub>3</sub>), -0.11 (3 H, s, Si(CH<sub>3</sub>)<sub>2</sub>), -0.55 (3 H, s, Si(CH<sub>3</sub>)<sub>2</sub>); **<sup>13</sup>C NMR** (101 MHz; CDCl<sub>3</sub>)  $\delta$  164.4 (C<sub>q</sub> tetrazole), 160.1 (C<sub>q</sub> PMB), 138.0 (C<sub>q</sub>), 133.9 (C<sub>q</sub>), 131.8 (C<sub>q</sub>), 130.6 (C<sub>q</sub>), 129.0, 128.3,

128.3, 127.8, 127.7, 127.6, 127.5, 125.0, 114.3, 86.5 (C1), 80.2 (C3), 75.7 (C2), 72.1 (CH<sub>2</sub>Ph-attached to C2), 71.6 (CH<sub>2</sub>Ph-attached to C3), 70.4 (C4), 69.1 (C5), 56.5 (CH<sub>2</sub>Ph PMB), 55.3 (OCH<sub>3</sub>), 25.5 (C(CH<sub>3</sub>)<sub>3</sub>), 17.7 (C(CH<sub>3</sub>)<sub>3</sub>), -4.1 (Si(CH<sub>3</sub>)<sub>2</sub>), -5.9 (Si(CH<sub>3</sub>)<sub>2</sub>); **<sup>13</sup>C-GATED** (101 MHz; CDCl<sub>3</sub>): 86.5 (<sup>1</sup>J<sub>C1-H1</sub> = 168 Hz, C1); **HRMS** (ES<sup>+</sup>) *m/z* [Found: (M+H)<sup>+</sup> 725.3192 C<sub>40</sub>H<sub>50</sub>N<sub>4</sub>O<sub>5</sub>SSi requires (M+H)<sup>+</sup>, 725.3187].

## S2.8. Compound 11 triethylammonium salt

To a stirred solution of **5** (75 mg, 0.12 mmol, 1.0 equiv) in CH<sub>2</sub>Cl<sub>2</sub> (1 mL) was added Et<sub>3</sub>N (17 μL, d = 0.726, 0.12 mmol, 1.0 equiv). The reaction was left stirring for 1 h and then was dried *in vacuo*, giving the title compound as a yellow oil (80 mg, 0.11 mmol, 94%). [ $\alpha$ ]<sub>D</sub><sup>22</sup> -42.4 (c. 0.46, CHCl<sub>3</sub>); **<sup>1</sup>H NMR** (400 MHz; CDCl<sub>3</sub>) δ 7.51 – 7.26 (15 H, m, Ar-H), 5.62 (1 H, d, *J* = 9.3 Hz, H<sub>5</sub>), 5.56 (1 H, d, *J* = 1.5 Hz, H<sub>1</sub>), 4.77 (1 H, d, *J* = 11.9 Hz, CH<sub>2</sub>Ph), 4.74 (1 H, d, *J* = 11.8 Hz, CH<sub>2</sub>Ph), 4.71 (1 H, d, *J* = 12.0 Hz, CH<sub>2</sub>Ph), 4.67 (1 H, d, *J* = 11.3 Hz, CH<sub>2</sub>Ph), 4.53 (1 H, app. t, *J* = 9.1 Hz, H<sub>4</sub>), 4.13 (1 H, app. t, *J* = 2.2 Hz), 3.86 (1 H, dd, *J* = 8.9, 2.9 Hz, H<sub>3</sub>), 3.05 (6 H, q, *J* = 7.3 Hz, N(CH<sub>2</sub>CH<sub>3</sub>)<sub>3</sub>), 1.23 (9 H, t, *J* = 7.3 Hz, N(CH<sub>2</sub>CH<sub>3</sub>)<sub>3</sub>), 0.75 (9 H, s, C(CH<sub>3</sub>)<sub>3</sub>), 0.00 (3 H, s, Si(CH<sub>3</sub>)<sub>2</sub>), -0.43 (3 H, s, Si(CH<sub>3</sub>)<sub>2</sub>); **<sup>13</sup>C NMR** (101 MHz; CDCl<sub>3</sub>) δ 159.6 (C<sub>q</sub> tetrazole), 138.2 (C<sub>q</sub>), 138.1 (C<sub>q</sub>), 134.3 (C<sub>q</sub>), 131.9, 128.9, 128.4, 128.3, 128.1, 127.9, 127.8, 127.6, 127.4, 86.9 (C1), 81.0 (C3), 77.2 (C2), 73.1 (CH<sub>2</sub>Ph), 72.3 (CH<sub>2</sub>Ph), 71.7 (C4), 69.8 (C5), 45.2 (N(CH<sub>2</sub>CH<sub>3</sub>)<sub>3</sub>), 25.7 (C(CH<sub>3</sub>)<sub>3</sub>), 17.9 (C(CH<sub>3</sub>)<sub>3</sub>), 8.5 (N(CH<sub>2</sub>CH<sub>3</sub>)<sub>3</sub>), -4.4 (Si(CH<sub>3</sub>)<sub>2</sub>), -5.9 (Si(CH<sub>3</sub>)<sub>2</sub>).

## S2.9. Benzyl-protected C-6 tetrazole thioglycosides 13 and 14

To a stirred solution of compound **11** triethylammonium salt (80 mg, 0.11 mmol, 1.0 equiv) in DMF (1.1 mL) was added BnBr (20 μL, d = 1.438, 0.17 mmol, 1.5 equiv). The reaction was left stirring for 3 h and was diluted with CH<sub>2</sub>Cl<sub>2</sub> (10 mL). The organic layer was washed with brine (10 mL), dried over MgSO<sub>4</sub>, filtered and concentrated under reduced pressure. The crude product was purified using silica gel flash column chromatography, eluting with acetone/toluene (1/250, 1/150, 1/100) to furnish the inseparable isomers **13** and **14** as colourless oil in 1/1.2 ratio (24 mg, 34 μmol, 31%). R<sub>f</sub> 0.80 (EtOAc/petroleum ether, 1/50); **<sup>1</sup>H NMR** (400 MHz; CDCl<sub>3</sub>) δ 7.41 – 7.18 (40 H, m, Ar-H), 5.73 (1 H, d, *J* = 14.3 Hz, CH<sub>2</sub>Ph benzyl tetrazole, N<sub>2</sub>-isomer), 5.68 (1 H, d, *J* = 14.2 Hz, CH<sub>2</sub>Ph benzyl tetrazole, N<sub>2</sub>-isomer), 5.57 (1 H, d, *J* = 2.7 Hz, H<sub>1</sub> N<sub>1</sub>-isomer), 5.56 (1 H, d, *J* = 2.4 Hz, H<sub>1</sub> N<sub>2</sub>-isomer), 5.54 (2 H, d, *J* = 1.9 Hz, CH<sub>2</sub>Ph benzyl tetrazole, N<sub>1</sub>-isomer), 5.50 (1 H, d, *J* = 9.5 Hz, H<sub>5</sub> N<sub>1</sub>-isomer), 5.40 (1 H, d, *J* = 9.2 Hz, H<sub>5</sub> N<sub>2</sub>-isomer), 4.67 (1 H, d, *J* = 12.2 Hz, CH<sub>2</sub>Ph), 4.65 (1 H, d, *J* = 11.6 Hz, CH<sub>2</sub>Ph), 4.63 (1 H, d, *J* = 12.2 Hz, CH<sub>2</sub>Ph), 4.61 (1 H, d, *J* = 11.9 Hz, CH<sub>2</sub>Ph), 4.60 (1 H, m, H<sub>4</sub> N<sub>2</sub>-isomer) 4.59 (1 H, d, *J* = 11.7 Hz, CH<sub>2</sub>Ph), 4.57 (1 H, d, *J* = 12.3 Hz, CH<sub>2</sub>Ph), 4.54 (2 H, s, CH<sub>2</sub>Ph), 4.43 (1 H, app. t, *J* = 9.1 Hz, H<sub>4</sub> N<sub>1</sub>-isomer), 4.04 (1 H, app. t, *J* = 2.8 Hz, H<sub>2</sub> N<sub>1</sub>-isomer), 4.00 (1 H, app. t, *J* = 2.6 Hz, H<sub>2</sub> N<sub>2</sub>-isomer), 3.70 (1 H, dd, *J* = 8.9, 2.9 Hz, H<sub>3</sub> N<sub>1</sub> and N<sub>2</sub>-isomers), 0.63 (9 H, s, C(CH<sub>3</sub>)<sub>3</sub>), 0.51 (9 H, s, C(CH<sub>3</sub>)<sub>3</sub>), -0.11 (3 H, s, Si(CH<sub>3</sub>)<sub>2</sub>), -0.17

(3 H, s, Si(CH<sub>3</sub>)<sub>2</sub>), -0.54 (3 H, s, Si(CH<sub>3</sub>)<sub>2</sub>), -0.68 (3 H, s, Si(CH<sub>3</sub>)<sub>2</sub>); **<sup>13</sup>C NMR** (101 MHz; CDCl<sub>3</sub>) 164.5 (C<sub>q</sub> tetrazole, N<sub>2</sub>-isomer), 152.3 (C<sub>q</sub> tetrazole, N<sub>1</sub>-isomer), 138.0 (C<sub>q</sub>), 137.9 (C<sub>q</sub>), 137.8 (C<sub>q</sub>), 137.5 (C<sub>q</sub>), 134.5 (C<sub>q</sub>), 133.9 (C<sub>q</sub>), 133.6 (C<sub>q</sub>), 133.5 (C<sub>q</sub>), 132.8, 131.8, 131.0, 129.2, 129.1, 129.0, 128.9, 128.8, 128.6, 128.5, 128.4, 128.3, 128.3, 128.3, 128.0, 127.9, 127.8, 127.7, 127.7, 127.6, 127.5, 86.5 (C1, N<sub>1</sub> or N<sub>2</sub>-isomer), 86.4 (C1, N<sub>1</sub> or N<sub>2</sub>-isomer), 80.2 (C3, N<sub>1</sub> or N<sub>2</sub>-isomer), 80.1 (C3, N<sub>1</sub> or N<sub>2</sub>-isomer), 76.3 (C2, N<sub>1</sub>-isomer), 75.7 (C2, N<sub>2</sub>-isomer), 72.9 (CH<sub>2</sub>Ph), 72.1 (2C, CH<sub>2</sub>Ph), 71.6 (CH<sub>2</sub>Ph), 70.4 (C4, N<sub>2</sub>-isomer), 69.9 (C4, N<sub>1</sub>-isomer), 69.1 (C5, N<sub>2</sub>-isomer), 67.8 (C5, N<sub>1</sub>-isomer), 56.9 (CH<sub>2</sub>Ph tetrazole, N<sub>2</sub>-isomer), 51.2 (CH<sub>2</sub>Ph tetrazole, N<sub>1</sub>-isomer), 25.6 (C(CH<sub>3</sub>)<sub>3</sub>), 25.5 (C(CH<sub>3</sub>)<sub>3</sub>), 17.8 (C(CH<sub>3</sub>)<sub>3</sub>), 17.7 (C(CH<sub>3</sub>)<sub>3</sub>), -4.2 (Si(CH<sub>3</sub>)<sub>2</sub>), -4.5 (Si(CH<sub>3</sub>)<sub>2</sub>), -5.9 (Si(CH<sub>3</sub>)<sub>2</sub>), -6.0 (Si(CH<sub>3</sub>)<sub>2</sub>); **<sup>13</sup>C-GATED** (101 MHz; CDCl<sub>3</sub>): 86.5 and 86.4 (<sup>1</sup>J<sub>C1-H1</sub> = 168 Hz, C1); **HRMS** (ES<sup>+</sup>) *m/z* [Found: (M+H)<sup>+</sup> 695.3084 C<sub>39</sub>H<sub>47</sub>N<sub>4</sub>O<sub>4</sub>SSi requires (M+H)<sup>+</sup>, 695.3082].

## S2.10. C-6 nitrile thioglycoside 16

### S2.10.1. C-6 aldehyde thioglycoside intermediate

To a stirred solution of **15**<sup>2</sup> (420 mg, 0.77 mmol, 1.0 equiv) in dimethyl sulfoxide (7.7 mL) was added Et<sub>3</sub>N (323 μL, d = 0.726, 2.32 mmol, 3.0 equiv) and sulfur trioxide pyridine complex (369 mg, 2.32 mmol, 3.0 equiv) at room temperature. The reaction mixture was left stirring for 1 h before it was diluted with EtOAc (25 mL) and H<sub>2</sub>O (20 mL). The whole was extracted with EtOAc (3 × 20 mL) and the extracts were washed with H<sub>2</sub>O (5 × 30 mL) and brine (2 × 30 mL). The organic layer was dried over Na<sub>2</sub>SO<sub>4</sub>, filtered and concentrated under reduced pressure. The crude aldehyde was obtained as a yellow oil (400 mg, 0.74 mmol, 96%) and was carried on the next step without further purification. R<sub>f</sub> 0.83 (EtOAc/hexane, 1/2); [ $\alpha$ ]<sub>D</sub><sup>22</sup> +40.5 (c. 1.0, CHCl<sub>3</sub>); **<sup>1</sup>H NMR** (400 MHz; CDCl<sub>3</sub>)  $\delta$  9.73 (1 H, s, CHO), 7.49 – 7.27 (20 H, m, Ar-H), 5.59 (1 H, t, *J* = 6.3 Hz, H<sub>1</sub>), 4.69 (1 H, d, *J* = 12.9 Hz, CH<sub>2</sub>Ph), 4.63 (1 H, d, *J* = 12.8 Hz, CH<sub>2</sub>Ph), 4.59 (2 H, d, *J* = 12.0 Hz, CH<sub>2</sub>Ph), 4.55 (1 H, d, *J* = 11.9 Hz, CH<sub>2</sub>Ph), 4.54 (1 H, d, *J* = 12.5 Hz, CH<sub>2</sub>Ph), 4.49 (1 H, d, *J* = 7.7 Hz, H<sub>5</sub>), 4.08 (1 H, app. t, *J* = 7.7 Hz, H<sub>4</sub>), 3.94 – 3.91 (1 H, m, H<sub>2</sub>), 3.87 (1 H, dd, *J* = 7.6, 2.8 Hz, H<sub>3</sub>); **<sup>13</sup>C NMR** (101 MHz; CDCl<sub>3</sub>)  $\delta$  197.6 (CHO), 137.6 (C<sub>q</sub>), 137.6 (C<sub>q</sub>), 137.6 (C<sub>q</sub>), 133.5 (C<sub>q</sub>), 131.6, 129.1, 128.5, 128.4, 128.0, 128.0, 128.0, 127.9, 127.9, 127.9, 127.6, 84.9 (C1), 77.4 (C3), 77.2 (C5), 75.0 (C2), 74.7 (C4), 74.3 (CH<sub>2</sub>Ph), 72.3 (CH<sub>2</sub>Ph), 72.2 (CH<sub>2</sub>Ph). These data were consistent with literature values.<sup>2</sup>

### S2.10.2. C-6 oxime thioglycoside intermediate

The crude aldehyde from the previous step (4.72 g, 8.73 mmol, 1.0 equiv) was dissolved in THF (873 mL) and a solution of H<sub>2</sub>NOH.HCl (606 mg, 8.73 mmol, 1.0 equiv) dissolved in H<sub>2</sub>O (17.5 mL) was added dropwise. The mixture was cooled to 0 °C and a solution of Na<sub>2</sub>CO<sub>3</sub> (1.1 g, 10.5 mmol, 1.2 equiv) dissolved in H<sub>2</sub>O (10.5 mL) was added dropwise. The solution was slowly warmed to room temperature and stirred for 24 h. The mixture was diluted with H<sub>2</sub>O (200 mL) and then extracted with EtOAc (4 × 400 mL). The

organic layers were combined, dried over Na<sub>2</sub>SO<sub>4</sub>, filtered and concentrated under reduced pressure. The obtained crude oil was purified using silica gel flash column chromatography, eluting with Et<sub>2</sub>O/petroleum ether (0/100, 5/95, 10/90, 20/80) to furnish the title compound as a colourless oil. *Cis* and *trans* (1/7) isomers were isolated separately (major isomer: 3.8 g, 6.54 mmol, 78%, minor isomer: 550 mg, 0.99 mmol, 11%) and both were used for the next step. Major isomer R<sub>f</sub> 0.70; minor isomer R<sub>f</sub> 0.62 (EtOAc/petroleum ether, 1/2); major:  $[\alpha]_D^{22} +87.7$  (c. 3.1, CHCl<sub>3</sub>); **<sup>1</sup>H NMR** (400 MHz; CDCl<sub>3</sub>) major isomer  $\delta$  7.46 (1 H, d, *J* = 6.5 Hz, HC=N), 7.47 – 7.25 (20 H, m, Ar-H), 5.49 (1 H, d, *J* = 1.5 Hz, H<sub>1</sub>), 4.86 (1 H, d, *J* = 10.9 Hz, CH<sub>2</sub>Ph), 4.73 (1 H, dd, *J* = 10.5, 5.6 Hz, H<sub>5</sub>), 4.68 (1 H, d, *J* = 12.4 Hz, CH<sub>2</sub>Ph), 4.66 (1 H, d, *J* = 11.7 Hz, CH<sub>2</sub>Ph), 4.65 (1 H, d, *J* = 10.7 Hz, CH<sub>2</sub>Ph), 4.64 (1 H, d, *J* = 12.3 Hz, CH<sub>2</sub>Ph), 4.61 (1 H, d, *J* = 11.7 Hz, CH<sub>2</sub>Ph), 4.01 (1 H, app. t, *J* = 9.4 Hz, H<sub>4</sub>), 4.01– 3.98 (1 H, m, H<sub>2</sub>), 3.87 (1 H, dd, *J* = 9.2, 2.9 Hz, H<sub>3</sub>); **<sup>13</sup>C NMR** (101 MHz; CDCl<sub>3</sub>)  $\delta$  148.7 (HC=N), 138.1 (C<sub>q</sub>), 137.7 (C<sub>q</sub>), 133.9 (C<sub>q</sub>), 131.7 (C<sub>q</sub>), 129.1, 128.4, 128.4, 128.3, 128.5, 128.0, 127.8, 127.8, 127.8, 127.6, 86.1 (C1), 79.5 (C3), 76.4 (1 C, C2 or C4), 76.3 (1 C, C2 or C4), 75.1 (CH<sub>2</sub>Ph), 72.4 (CH<sub>2</sub>Ph), 72.3 (CH<sub>2</sub>Ph), 70.6 (C5); **HRMS** (ES<sup>+</sup>) *m/z* [Found: (M+Na)<sup>+</sup> 578.1993 C<sub>33</sub>H<sub>33</sub>NO<sub>5</sub>Na requires (M+Na)<sup>+</sup>, 578.1977].

### S2.10.3 C-6 nitrile thioglycoside 16

The previously synthesised oxime (4.35 g, 7.83 mmol, 1.0 equiv) was dissolved in dry MeCN (783 mL) and POCl<sub>3</sub> (729  $\mu$ L, d = 1.645, 7.83 mmol, 1.0 equiv) was added at room temperature. The solution was stirred for 5 min. at room temperature, heated up to 65 °C and then stirred for 3 h. The reaction was quenched with sat. aq. NaHCO<sub>3</sub> solution (20 mL) and extracted with EtOAc (3  $\times$  300 mL). The organic layers were combined, dried over Na<sub>2</sub>SO<sub>4</sub>, filtered and concentrated under reduced pressure. The crude product was purified using silica gel flash column chromatography, eluting with EtOAc/petroleum ether (0/100, 5/95, 10/90, 20/80) to furnish **16** as a yellow oil (2.5 g, 4.65 mmol, 59%). R<sub>f</sub> 0.76 (EtOAc/hexane, 1/2);  $[\alpha]_D^{22} +71.0$  (c. 0.93, CHCl<sub>3</sub>); **<sup>1</sup>H NMR** (400 MHz; CDCl<sub>3</sub>)  $\delta$  7.38 – 7.28 (20 H, m, Ar-H), 5.48 (1 H, d, *J* = 2.2 Hz, H<sub>1</sub>), 4.88 (1 H, d, *J* = 12.9 Hz, CH<sub>2</sub>Ph), 4.88 (1H, d, *J* = 9.7 Hz, H<sub>5</sub>), 4.68 (1 H, d, *J* = 12.1 Hz, CH<sub>2</sub>Ph), 4.66 (2 H, d, *J* = 11.6 Hz, CH<sub>2</sub>Ph), 4.63 (1 H, d, *J* = 11.9 Hz, CH<sub>2</sub>Ph), 4.60 (1 H, d, *J* = 11.7 Hz, CH<sub>2</sub>Ph), 4.19 (1 H, app.t, *J* = 9.2 Hz, H<sub>4</sub>), 3.93 (1 H, app. t, *J* = 2.6 Hz, H<sub>2</sub>), 3.71 (1 H, dd, *J* = 8.9, 2.9 Hz, H<sub>3</sub>); **<sup>13</sup>C NMR** (101 MHz; CDCl<sub>3</sub>)  $\delta$  137.5 (C<sub>q</sub>), 137.3 (C<sub>q</sub>), 137.2 (C<sub>q</sub>), 132.7 (C<sub>q</sub>), 131.5 (C<sub>q</sub>), 129.3, 128.5, 128.5, 128.5, 128.4, 128.2, 128.1, 128.0, 128.0, 127.9, 117.1 (C $\equiv$ N), 86.2 (C1), 78.4 (C3), 76.1 (C4), 75.8 (C2 or CH<sub>2</sub>Ph), 75.7 (C2 or CH<sub>2</sub>Ph), 72.7 (CH<sub>2</sub>Ph), 72.6 (CH<sub>2</sub>Ph), 62.2 (C5); **HRMS** (ES<sup>+</sup>) *m/z* [Found: (M+H)<sup>+</sup> 538.2068 C<sub>33</sub>H<sub>33</sub>NO<sub>4</sub>S requires (M+H)<sup>+</sup>, 358.2052].



### S2.11. Compound 17

C6-nitrile thioglycoside **16** (2.5 g, 4.65 mmol, 1.0 equiv) was dissolved in toluene (465 mL) and TMSN<sub>3</sub> (3.7 mL, d = 0.872, 27.9 mmol, 6.0 equiv) and Bu<sub>2</sub>SnO (463 mg, 1.86 mmol, 0.4 equiv) were added. The mixture was heated to 120 °C and stirred for 16 h. Upon completion, the mixture was cooled down to room temperature, diluted with EtOAc (400 mL) and washed with 0.1 M aq. HCl (250 mL). The organic layer was dried over Na<sub>2</sub>SO<sub>4</sub>, filtered and concentrated under reduced pressure to afford the crude product. Purification of the crude material by silica gel flash column chromatography, eluting with MeOH/CH<sub>2</sub>Cl<sub>2</sub> (0/100, 2/98, 5/95) afforded **17** as a brown oil (1.5 g, 2.58 mmol, 55%). R<sub>f</sub> 0.65 (MeOH/CH<sub>2</sub>Cl<sub>2</sub>, 1/9); [ $\alpha$ ]<sub>D</sub><sup>22</sup> +95.0 (c. 1.96, CHCl<sub>3</sub>); **<sup>1</sup>H NMR** (400 MHz; CDCl<sub>3</sub>)  $\delta$  7.37 – 7.08 (20 H, m, Ar-H), 5.61 (1 H, d, *J* = 9.7 Hz, H<sub>5</sub>), 5.54 (1 H, d, *J* = 1.7 Hz, H<sub>1</sub>), 4.71 (2 H, d, *J* = 11.9 Hz, CH<sub>2</sub>Ph), 4.70 (1 H, d, *J* = 10.5 Hz, CH<sub>2</sub>Ph), 4.65 (2 H, d, *J* = 11.8 Hz, CH<sub>2</sub>Ph), 4.38 (1 H, d, *J* = 10.7 Hz, CH<sub>2</sub>Ph), 4.19 (1 H, app. t, *J* = 9.4 Hz, H<sub>4</sub>), 4.08 (1 H, dd, *J* = 2.7, 2.1 Hz, H<sub>2</sub>), 3.99 (1 H, dd, *J* = 9.2, 2.9 Hz, H<sub>3</sub>); **<sup>13</sup>C NMR** (101 MHz; CDCl<sub>3</sub>)  $\delta$  155.0 (C<sub>q</sub> tetrazole), 137.6 (C<sub>q</sub>), 137.1 (C<sub>q</sub>), 137.0 (C<sub>q</sub>), 132.8 (C<sub>q</sub>), 132.0, 129.3, 128.7, 128.6, 128.6, 128.4, 128.4, 128.4, 128.1, 128.1, 128.0, 127.9, 86.8 (C1), 79.4 (C3), 76.6 (C2 and C4), 75.0 (CH<sub>2</sub>Ph), 73.3 (CH<sub>2</sub>Ph), 72.8 (CH<sub>2</sub>Ph), 66.5 (C5); **HRMS** (ES<sup>+</sup>) *m/z* [Found: (M+H)<sup>+</sup> 581.2251 C<sub>33</sub>H<sub>34</sub>N<sub>4</sub>O<sub>4</sub>S requires (M+H)<sup>+</sup>, 581.2223].

### S2.12. PMB-protected C-6 tetrazole thioglycosides 18 and 19

To a stirred solution of **17** (920 mg, 1.37 mmol, 1.0 equiv) in DMF (10 mL) was added successively, KI (341 mg, 2.06 mmol, 1.5 equiv), K<sub>2</sub>CO<sub>3</sub> (227 mg, 1.65 mmol, 1.2 equiv) and PMBCl (279  $\mu$ L, d = 1.155, 2.06 mmol, 1.5 equiv). The reaction was left stirring for 16 h and was diluted with CH<sub>2</sub>Cl<sub>2</sub> (30 mL). The organic layer was washed with 10% aq. Na<sub>2</sub>S<sub>2</sub>O<sub>3</sub> solution (30 mL) and brine (30 mL), dried over MgSO<sub>4</sub>, filtered and concentrated under reduced pressure. The crude product was purified using silica gel flash column chromatography, eluting with EtOAc/petroleum ether (5/95, 10/90, 15/85) to furnish isomers **18** and **19** (732 mg, 1.04 mmol, 76%) as colourless oils.

#### S2.12.1. Compound 18

N<sub>1</sub>-regioisomer **18** was isolated as a yellow oil (374 mg, 0.53 mmol, 39%). R<sub>f</sub> 0.72 (EtOAc/petroleum ether, 1/2); [ $\alpha$ ]<sub>D</sub><sup>22</sup> +48.5 (c. 2.75, CHCl<sub>3</sub>); **<sup>1</sup>H NMR** (400 MHz; CDCl<sub>3</sub>)  $\delta$  7.39 – 6.95 (21 H, m, Ar-H), 7.00 (2 H, d, *J* = 8.8 Hz, Ar-H PMB), 6.65 (2 H, d, *J* = 8.8 Hz, Ar-H PMB), 5.61 (1 H, d, *J* = 1.6 Hz, H<sub>1</sub>), 5.45 (1 H, d, *J* = 9.9 Hz, H<sub>5</sub>), 5.28 (1 H, d, *J* = 15.0 Hz, CH<sub>2</sub>Ph-PMB), 5.19 (1 H, d, *J* = 15.0 Hz, CH<sub>2</sub>Ph-PMB), 4.72 (2 H, d, *J* = 12.5 Hz, CH<sub>2</sub>Ph), 4.70 (1 H, d, *J* = 11.7 Hz, CH<sub>2</sub>Ph), 4.67 (1 H, d, *J* = 11.0 Hz, CH<sub>2</sub>Ph), 4.65 (1 H, d, *J* = 12.3 Hz, CH<sub>2</sub>Ph), 4.45 (1 H, app. t, *J* = 9.6 Hz, H<sub>4</sub>), 4.33 (1 H, d, *J* = 10.6 Hz, CH<sub>2</sub>Ph), 4.08 (1 H, dd, *J* = 2.7, 2.0 Hz, H<sub>2</sub>), 3.93 (1 H, dd, *J* = 9.2, 2.8 Hz, H<sub>3</sub>), 3.70 (3 H, s, OCH<sub>3</sub>); **<sup>13</sup>C NMR** (101 MHz; CDCl<sub>3</sub>)  $\delta$  159.6 (C<sub>q</sub> PMB), 152.2 (C<sub>q</sub> tetrazole), 137.8 (C<sub>q</sub>),

137.5 (C<sub>q</sub>), 137.5 (C<sub>q</sub>), 133.3 (C<sub>q</sub>), 130.7 (C<sub>q</sub>), 129.3, 129.3, 128.5, 128.3, 128.2, 128.1, 128.0, 127.9, 127.8, 127.8, 127.7, 125.6, 114.1, 86.3 (C1), 79.7 (C3), 76.4 (C2), 76.0 (C4), 75.1 (CH<sub>2</sub>Ph), 72.8 (CH<sub>2</sub>Ph), 72.5 (CH<sub>2</sub>Ph), 65.6 (C5), 55.2 (OCH<sub>3</sub>), 50.5 (CH<sub>2</sub>Ph PMB); **<sup>13</sup>C-GATED** (101 MHz; CDCl<sub>3</sub>): 86.3 (<sup>1</sup>J<sub>C1-H1</sub> = 172 Hz, C1); **HRMS** (ES<sup>+</sup>) *m/z* [Found: (M+H)<sup>+</sup> 701.2829 C<sub>41</sub>H<sub>42</sub>N<sub>4</sub>O<sub>4</sub>S requires (M+H)<sup>+</sup>, 701.2798].

### S2.12.2. Compound 19

N<sub>2</sub>-regioisomer **19** was isolated as a yellow oil (355 mg, 0.51 mmol, 37%). R<sub>f</sub> 0.73 (EtOAc/petroleum ether, 1/2); **<sup>1</sup>H NMR** (400 MHz; CDCl<sub>3</sub>) δ 7.38 – 7.13 (21 H, m, Ar-H), 6.84 (2 H, d, *J* = 8.0 Hz, Ar-H PMB), 6.76 (2 H, d, *J* = 8.7 Hz, Ar-H PMB), 5.57 (1 H, d, *J* = 1.3 Hz, H<sub>1</sub>), 5.52 (1 H, d, *J* = 9.9 Hz, H<sub>5</sub>), 5.27 (1 H, d, *J* = 15.0 Hz, CH<sub>2</sub>Ph-PMB), 5.18 (1 H, d, *J* = 15.0 Hz, CH<sub>2</sub>Ph-PMB), 4.63 (1 H, d, *J* = 11.5 Hz, CH<sub>2</sub>Ph), 4.63 (1 H, d, *J* = 11.6 Hz, CH<sub>2</sub>Ph), 4.59 (1 H, d, *J* = 11.9 Hz, CH<sub>2</sub>Ph), 4.58 (1 H, app. t, *J* = 9.9 Hz, H<sub>4</sub>), 4.56 (1 H, d, *J* = 11.5 Hz, CH<sub>2</sub>Ph), 4.08 – 4.06 (1 H, m, H<sub>2</sub>), 3.94 (1 H, dd, *J* = 9.3, 1.2 Hz, H<sub>3</sub>), 4.33 (1 H, d, *J* = 10.7 Hz, CH<sub>2</sub>Ph), 4.23 (1 H, d, *J* = 10.8 Hz, CH<sub>2</sub>Ph), 3.67 (1 H, s, OCH<sub>3</sub>); **<sup>13</sup>C NMR** (101 MHz; CDCl<sub>3</sub>) δ 164.3 (C<sub>q</sub> tetrazole), 160.0 (C<sub>q</sub> PMB), 138.1 (C<sub>q</sub>), 138.1 (C<sub>q</sub>), 137.8 (C<sub>q</sub>), 133.8 (C<sub>q</sub>), 132.0 (C<sub>q</sub>), 129.4, 129.3, 128.6, 128.5, 128.3, 128.1, 128.1, 127.9, 127.8, 127.7, 125.3, 114.3, 86.6 (C1), 79.8 (C3), 76.3 (C2), 76.0 (C4), 75.1 (CH<sub>2</sub>Ph), 72.4 (CH<sub>2</sub>Ph), 72.2 (CH<sub>2</sub>Ph), 67.1 (C5), 56.5 (CH<sub>2</sub>Ph PMB), 55.3 (OCH<sub>3</sub>); **<sup>13</sup>C-GATED** (101 MHz; CDCl<sub>3</sub>): 86.6 (<sup>1</sup>J<sub>C1-H1</sub> = 168 Hz, C1); **HRMS** (ES<sup>+</sup>) *m/z* [Found: (M+H)<sup>+</sup> 701.2829 C<sub>41</sub>H<sub>42</sub>N<sub>4</sub>O<sub>4</sub>S requires (M+H)<sup>+</sup>, 701.2798].

### S2.13. Compound 20

#### S2.13.1. Protected aminopropyl derivative

A solution of **18** and **19** (290 mg, 0.41 mmol, 1.0 equiv) and 3-(benzyloxycarbonylamino)-1-propanol (259 mg, 1.24 mmol, 3.0 equiv) in CH<sub>2</sub>Cl<sub>2</sub> (4.1 mL) was stirred over activated MS 4Å for 1 h before NIS (139 mg, 0.62 mmol, 1.5 equiv) was added. The mixture was cooled to –40 °C before AgOTf (53 mg, 0.21 mmol, 0.5 equiv) was added. The reaction was warmed up to 0 °C and stirred for 3 h. Upon completion, Et<sub>3</sub>N was added until pH = 7, and subsequently diluted with CH<sub>2</sub>Cl<sub>2</sub> (20 mL). The organic layer was washed with 10% aq. Na<sub>2</sub>S<sub>2</sub>O<sub>3</sub> solution (20 mL), brine (20 mL), dried over MgSO<sub>4</sub>, filtered and concentrated under reduced pressure. Flash column chromatography, eluting with EtOAc/petroleum (30/70, 40/60 and 50/50) afforded the title compound as a colourless oil in an anomeric mixture of α/β = 3/1 ratio (110 mg, 0.14 mmol, 34%). R<sub>f</sub> 0.66 (EtOAc/toluene, 3/7); **<sup>1</sup>H NMR** (400 MHz; CDCl<sub>3</sub>) 7.40 – 7.22 (23 H, m, Ar-H), 7.19 – 7.09 (6 H, m, Ar-H PMB), 6.83 – 6.73 (4 H, m, Ar-H PMB), 5.65 (1 H, d, *J* = 14.4 Hz, CH<sub>2</sub>Ph PMB), 5.60 (1 H, d, *J* = 14.6 Hz, CH<sub>2</sub>Ph PMB), 5.60 (1 H, d, *J* = 14.6 Hz, CH<sub>2</sub>Ph PMB), 5.55 (1 H, d, *J* = 14.4 Hz, CH<sub>2</sub>Ph PMB), 5.09 (1 H, d, *J* = 12.0 Hz, CH<sub>2</sub>Ph), 5.03 (1 H, d, *J* = 12.4 Hz, CH<sub>2</sub>Ph), 4.96 (1 H, d, *J* = 12.6 Hz, CH<sub>2</sub>Ph), 4.92 (1 H, d, *J* = 9.9 Hz, H<sub>5</sub> α-anomer), 4.85 (1 H, d, *J* = 2.2 Hz, H<sub>1</sub> α-anomer), 4.83 (1 H, d, *J* = 12.6



Hz, CH<sub>2</sub>Ph), 4.78 (1 H, d, *J* = 12.5 Hz, CH<sub>2</sub>Ph), 4.73 (1 H, d, *J* = 11.2 Hz, CH<sub>2</sub>Ph), 4.69 (2 H, d, *J* = 10.7 Hz, CH<sub>2</sub>Ph), 4.63 (2 H, d, *J* = 11.8 Hz, CH<sub>2</sub>Ph), 4.62 (1 H, d, *J* = 9.6 Hz, H<sub>5</sub> β-anomer), 4.59 (1 H, d, *J* = 11.7 Hz, CH<sub>2</sub>Ph), 4.55 (1 H, d, *J* = 3.0 Hz, H<sub>1</sub> β-anomer), 4.53 (1 H, d, *J* = 12.8 Hz, CH<sub>2</sub>Ph), 4.49 (2 H, app. t, *J* = 9.7 Hz, H<sub>4</sub> α and β-anomer), 4.47 (1 H, d, *J* = 12.8 Hz, CH<sub>2</sub>Ph), 4.28 (1 H, d, *J* = 10.7 Hz, CH<sub>2</sub>Ph), 4.24 (1 H, d, *J* = 10.7 Hz, CH<sub>2</sub>Ph), 3.96 (1 H, d, *J* = 2.7 Hz, H<sub>2</sub> β-anomer), 3.95 (1 H, dd, *J* = 9.4, 2.9 Hz, H<sub>3</sub> α-anomer), 3.93 – 3.88 (1 H, m, OCH<sub>2</sub>CH<sub>2</sub>CH<sub>2</sub>NHCbz α-anomer), 3.90 – 3.79 (2 H, m, H<sub>2</sub> α-anomer, OCH<sub>2</sub>CH<sub>2</sub>CH<sub>2</sub>NHCbz β-anomer), 3.72 (3 H, s, OCH<sub>3</sub> α-anomer), 3.70 (3 H, s, OCH<sub>3</sub> β-anomer), 3.59 (1 H, dd, *J* = 9.4, 2.7 Hz, H<sub>3</sub> β-anomer), 3.56 – 3.50 (1 H, m, OCH<sub>2</sub>CH<sub>2</sub>CH<sub>2</sub>NHCbz α-anomer), 3.47 – 3.40 (1 H, m, OCH<sub>2</sub>CH<sub>2</sub>CH<sub>2</sub>NHCbz β-anomer), 3.28 (4 H, m, OCH<sub>2</sub>CH<sub>2</sub>CH<sub>2</sub>NHCbz α and β-anomer), 1.78 (4 H, dt, *J* = 12.9, 6.9 Hz, OCH<sub>2</sub>CH<sub>2</sub>CH<sub>2</sub>NHCbz α and β-anomer); **<sup>13</sup>C NMR** (101 MHz; CDCl<sub>3</sub>) δ 164.5 (C<sub>q</sub> tetrazole α-anomer), 164.0 (C<sub>q</sub> tetrazole β-anomer), 160.0 (C<sub>q</sub> PMB), 156.4 (C=O CBz), 138.6 (C<sub>q</sub>), 138.4 (2 C, C<sub>q</sub>), 138.2 (2 C, C<sub>q</sub>), 138.1 (C<sub>q</sub>), 138.1 (C<sub>q</sub>), 136.6 (C<sub>q</sub>), 130.0 (C<sub>q</sub>), 130.0 (C<sub>q</sub>), 129.1, 128.5, 128.5, 128.4, 128.4, 128.1, 128.1, 128.0, 127.7, 127.7, 127.7, 127.6, 127.6, 127.4, 114.3, 102.2 (C1 β-anomer), 98.9 (C1 α-anomer), 81.8 (C3 β-anomer), 79.9 (C3 α-anomer), 77.2 (2 C, C<sub>4</sub>, α and β-anomer), 75.0 (C2 α-anomer), 74.8 (CH<sub>2</sub>Ph), 74.2 (CH<sub>2</sub>Ph), 74.2 (C2 β-anomer), 74.1 (CH<sub>2</sub>Ph), 72.9 (CH<sub>2</sub>Ph), 72.5 (2 C, CH<sub>2</sub>Ph), 71.7 (CH<sub>2</sub>Ph), 69.8 (C5 β-anomer), 67.6 (OCH<sub>2</sub>CH<sub>2</sub>CH<sub>2</sub>NHCbz α-anomer), 66.6 (CH<sub>2</sub>Ph), 66.4 (C5 α-anomer), 65.8 (OCH<sub>2</sub>CH<sub>2</sub>CH<sub>2</sub>NHCbz β-anomer), 56.4 (2 C, CH<sub>2</sub>Ph PMB), 55.2 (2 C, OCH<sub>3</sub>), 38.4 (OCH<sub>2</sub>CH<sub>2</sub>CH<sub>2</sub>NHCbz α-anomer), 38.2 (OCH<sub>2</sub>CH<sub>2</sub>CH<sub>2</sub>NHCbz β-anomer), 29.7 (OCH<sub>2</sub>CH<sub>2</sub>CH<sub>2</sub>NHCbz β-anomer), 29.5 (OCH<sub>2</sub>CH<sub>2</sub>CH<sub>2</sub>NHCbz α-anomer); **<sup>13</sup>C-GATED** (101 MHz; CDCl<sub>3</sub>): 102.2 (<sup>1</sup>*J*<sub>C1-H1</sub> = 156 Hz, C1 β-anomer); **HRMS** (ES<sup>+</sup>) *m/z* [Found: (M+H)<sup>+</sup> 800.3693 C<sub>46</sub>H<sub>51</sub>N<sub>5</sub>O<sub>8</sub> requires (M+H)<sup>+</sup>, 800.3659].

### S2.13.2. Compound 20

Protected aminopropyl derivative (30 mg, 38 μmol, 1.0 equiv) was dissolved in a mixture of EtOH/THF (0.6 mL, 1.5/1 v/v), after which Pd/C (10%) (20 mg, 19 μmol, 0.5 equiv), Pd(OH)<sub>2</sub>/C (20%) (13 mg, 19 μmol, 0.5 equiv) and 0.1 M aq. HCl (380 μL, 38 μmol, 1.0 equiv) were added. The mixture was stirred for 56 h under an atmosphere of hydrogen (1 atm, balloon) at room temperature. TLC analysis (hexane/EtOAc, 1/2) showed complete conversion of starting material to a lower R<sub>f</sub> spot. The reaction mixture was filtered through Celite®, followed by solvent removal *in vacuo* to give white powder **20** in an anomeric mixture of α/β = 3/1 (11 mg, 36 μmol, 96%). R<sub>f</sub> 0.27 (H<sub>2</sub>O/MeCN, 1/2); **<sup>1</sup>H NMR** (400 MHz; D<sub>2</sub>O) δ 4.86 (1 H, s, H<sub>1</sub> α-anomer), 4.82 (1 H, d, *J* = 9.8 Hz, H<sub>5</sub>), 4.74 (1 H, s, H<sub>1</sub> β-anomer), 4.61 (1 H, d, *J* = 9.9 Hz, H<sub>5</sub> β-anomer), 4.15 (1 H, app. t, *J* = 9.9 Hz, H<sub>4</sub> α-anomer), 4.08 (app. t, *J* = 9.9 Hz, H<sub>4</sub> β-anomer), 4.03 (1 H, d, *J* = 3.2 Hz, H<sub>2</sub> β-anomer), 4.01 – 3.98 (1 H, m, H<sub>2</sub> α-anomer), 3.87 (1 H, dd, *J* = 9.8, 3.4 Hz, H<sub>3</sub> α-anomer), 3.84 – 3.76 (2 H, m, OCH<sub>2</sub>CH<sub>2</sub>CH<sub>2</sub>NH<sub>3</sub>.Cl α and β-anomer), 3.73 (1 H, dd, *J* = 9.8, 3.2 Hz, H<sub>3</sub> β-anomer), 3.56 (2 H, ddd, *J* = 17.3, 9.7, 4.5 Hz, OCH<sub>2</sub>CH<sub>2</sub>CH<sub>2</sub>NH<sub>3</sub>.Cl

$\alpha$  and  $\beta$ -anomer), 3.17 – 3.07 (2 H, m,  $\text{OCH}_2\text{CH}_2\text{CH}_2\text{NH}_3\cdot\text{Cl}$   $\alpha$ -anomer), 3.02 (2 H, td,  $J = 12.6, 7.2$  Hz,  $\text{OCH}_2\text{CH}_2\text{CH}_2\text{NH}_3\cdot\text{Cl}$   $\beta$ -anomer), 1.99 (2 H, dq,  $J = 13.6, 6.7$  Hz,  $\text{OCH}_2\text{CH}_2\text{CH}_2\text{NH}_3\cdot\text{Cl}$   $\alpha$ -anomer), 1.91 – 1.82 (2 H, m,  $\text{OCH}_2\text{CH}_2\text{CH}_2\text{NH}_3\cdot\text{Cl}$   $\beta$ -anomer);  **$^{13}\text{C}$  NMR** (101 MHz;  $\text{D}_2\text{O}$ )  $\delta$  160.1 (2 C,  $\text{C}_q$  tetrazole), 100.6 (C1  $\beta$ -anomer), 100.5 (C1  $\alpha$ -anomer), 72.7 (C3  $\beta$ -anomer), 70.5 (C3  $\alpha$ -anomer), 70.5 (C2  $\beta$ -anomer), 70.2 (C5  $\beta$ -anomer), 70.0 (C2  $\alpha$ -anomer), 69.6 (C4  $\beta$ -anomer), 69.5 (C4  $\alpha$ -anomer), 67.6 ( $\text{OCH}_2\text{CH}_2\text{CH}_2\text{NH}_3\cdot\text{Cl}$   $\beta$ -anomer), 66.6 (C5  $\alpha$ -anomer), 65.3 ( $\text{OCH}_2\text{CH}_2\text{CH}_2\text{NH}_3\cdot\text{Cl}$   $\alpha$ -anomer), 37.6 ( $\text{OCH}_2\text{CH}_2\text{CH}_2\text{NH}_3\cdot\text{Cl}$   $\beta$ -anomer), 37.4 ( $\text{OCH}_2\text{CH}_2\text{CH}_2\text{NH}_3\cdot\text{Cl}$   $\alpha$ -anomer), 26.7 ( $\text{OCH}_2\text{CH}_2\text{CH}_2\text{NH}_3\cdot\text{Cl}$   $\alpha$ -anomer), 26.6 ( $\text{OCH}_2\text{CH}_2\text{CH}_2\text{NH}_3\cdot\text{Cl}$   $\beta$ -anomer);  **$^{13}\text{C}$ -GATED** (101 MHz;  $\text{D}_2\text{O}$ ): 100.5 ( $^1J_{\text{C1-H1}} = 172$  Hz, C1  $\alpha$ -anomer); **HRMS** ( $\text{ES}^+$ )  $m/z$  [Found:  $(\text{M}+\text{H})^+$  276.1309  $\text{C}_9\text{H}_{19}\text{N}_5\text{O}_5$  requires  $(\text{M}+\text{H})^+$ , 276.1308].

## S2.14. Compound 21

### S2.14.1. Fully protected C-6 tetrazole 1-phosphates

A mixture of **18** and **19** (730 mg, 1.04 mmol, 1.0 equiv) was stirred with activated MS4Å for 1 h in  $\text{CH}_2\text{Cl}_2$  (10 mL). Dibenzyl phosphate (580 mg, 2.08 mmol, 2.0 equiv) was added, and the solution was stirred for further 30 min. before being cooled down to  $-30$  °C. NIS (350 mg, 1.56 mmol, 1.5 equiv) and  $\text{AgOTf}$  (133 mg, 0.52 mmol, 0.5 equiv) were added successively and the reaction mixture was stirred for further 3.5 h, allowing the temperature to reach  $0$  °C. When TLC analysis indicated conversion to a lower  $R_f$  value, the reaction was quenched by the addition of  $\text{Et}_3\text{N}$  (1.4 mL,  $d = 0.726$ , 10.4 mmol, 10.0 equiv) and diluted with  $\text{CH}_2\text{Cl}_2$  (50 mL). The organic layer was washed with 10% aq.  $\text{Na}_2\text{S}_2\text{O}_3$  solution (30 mL), brine (30 mL), dried over  $\text{MgSO}_4$ , filtered and concentrated under reduced pressure. Flash column chromatography, eluting with  $\text{EtOAc}$ /toluene (5/95, 10/90 and 30/70) afforded the protected 1-phosphate regioisomeric mixture as a colourless oil in a 50/50 ratio (650 mg, 0.75 mmol, 72%).  $R_f$  0.66 ( $\text{EtOAc}$ /toluene, 3/7);  **$^1\text{H}$  NMR** (400 MHz;  $\text{CDCl}_3$ )  $\delta$  7.38 – 7.27 (35 H, m, Ar-H), 7.14 (2 H, d,  $J = 7.2$  Hz, Ar-H PMB), 7.07 (2 H, d,  $J = 8.7$  Hz, Ar-H PMB), 6.93 (2 H, d,  $J = 6.7$  Hz, Ar-H), 6.82 (2 H, d,  $J = 6.5$  Hz, Ar-H), 6.75 (2 H, d,  $J = 8.8$  Hz, Ar-H PMB), 6.65 (2 H, d,  $J = 8.8$  Hz, Ar-H PMB), 5.76 (1 H, dd,  $J = 6.3, 1.8$  Hz,  $\text{H}_1$   $\text{N}_2$ -isomer), 5.69 (1 H, dd,  $J = 6.3, 2.1$  Hz,  $\text{H}_1$   $\text{N}_1$ -isomer), 5.65 (1 H, d,  $J = 14.0$  Hz,  $\text{CH}_2\text{Ph}$  PMB), 5.61 (1 H, d,  $J = 14.2$  Hz,  $\text{CH}_2\text{Ph}$  PMB), 5.33 (1 H, d,  $J = 15.0$  Hz,  $\text{CH}_2\text{Ph}$  PMB), 5.16 (1 H, d,  $J = 13.4$  Hz,  $\text{CH}_2\text{Ph}$  PMB), 5.15 (1 H, d,  $J = 10.0$  Hz,  $\text{H}_5$   $\text{N}_1$ -isomer or  $\text{N}_2$ -isomer), 5.12 (1 H, d,  $J = 9.7$  Hz,  $\text{H}_5$   $\text{N}_1$ -isomer or  $\text{N}_2$ -isomer), 5.04 (2 H, d,  $J = 8.6$  Hz,  $\text{OP}(\text{O})\text{OCH}_2\text{Ph}$ ), 4.96 (2 H, d,  $J = 8.3$  Hz,  $\text{OP}(\text{O})\text{OCH}_2\text{Ph}$ ), 4.95 (2 H, d,  $J = 8.3$  Hz,  $\text{OP}(\text{O})\text{OCH}_2\text{Ph}$ ), 4.94 (2 H, d,  $J = 8.3$  Hz,  $\text{OP}(\text{O})\text{OCH}_2\text{Ph}$ ), 4.72 (1 H, d,  $J = 11.9$  Hz,  $\text{CH}_2\text{Ph}$ ), 4.71 (1 H, d,  $J = 11.0$  Hz,  $\text{CH}_2\text{Ph}$ ), 4.69 (1 H, d,  $J = 11.2$  Hz,  $\text{CH}_2\text{Ph}$ ), 4.64 (1 H, d,  $J = 11.8$  Hz,  $\text{CH}_2\text{Ph}$ ), 4.64 (1 H, d,  $J = 10.1$  Hz,  $\text{CH}_2\text{Ph}$ ), 4.60 (1 H, d,  $J = 11.8$  Hz,  $\text{CH}_2\text{Ph}$ ), 4.57 (1 H, d,  $J = 10.6$  Hz,  $\text{CH}_2\text{Ph}$ ), 4.54 (2 H, d,  $J = 11.7$  Hz,  $\text{CH}_2\text{Ph}$ ), 4.53 (1 H, app. t,  $J = 9.6$  Hz,  $\text{H}_4$   $\text{N}_2$ -isomer), 4.49 (1 H, d,  $J = 11.6$  Hz,  $\text{CH}_2\text{Ph}$ ), 4.39 (1 H, app. t,  $J = 9.8$  Hz,  $\text{H}_4$   $\text{N}_1$ -isomer), 4.29 (1 H, d,  $J = 10.6$

Hz, CH<sub>2</sub>Ph), 4.21 (1 H, d, *J* = 10.7 Hz, CH<sub>2</sub>Ph), 3.89 (1 H, dd, *J* = 9.6, 3.2 Hz, H<sub>3</sub> N<sub>2</sub>-isomer), 3.86 (1 H, dd, *J* = 9.6, 3.0 Hz, H<sub>3</sub> N<sub>1</sub>-isomer), 3.78 (1 H, dd, *J* = 4.8, 2.2 Hz, H<sub>2</sub> N<sub>2</sub>-isomer), 3.74 – 3.72 (1 H, m, H<sub>2</sub> N<sub>1</sub>-isomer), 3.71 (3 H, s, OCH<sub>3</sub>), 3.70 (3 H, s, OCH<sub>3</sub>); **<sup>13</sup>C NMR** (101 MHz; CDCl<sub>3</sub>) δ 163.8 (C<sub>q</sub> tetrazole N<sub>2</sub>-isomer), 160.0 (C<sub>q</sub> PMB), 159.7 (C<sub>q</sub> PMB), 151.5 (C<sub>q</sub> tetrazole N<sub>1</sub>-isomer), 138.1 (C<sub>q</sub>), 138.0 (C<sub>q</sub>), 137.9 (C<sub>q</sub>), 137.7 (C<sub>q</sub>), 137.4 (C<sub>q</sub>), 137.4 (C<sub>q</sub>), 135.6 (d, *J* = 6.7 Hz, C<sub>q</sub> OP(O)OBn), 135.5 (d, *J* = 6.7 Hz, C<sub>q</sub> OP(O)OBn), 135.2 (d, *J* = 6.2 Hz, C<sub>q</sub> OP(O)OBn), 135.1 (d, *J* = 6.4 Hz, C<sub>q</sub> OP(O)OBn), 130.0 (C<sub>q</sub>), 129.6 (C<sub>q</sub>), 128.9, 128.7, 128.7, 128.6, 128.6, 128.6, 128.5, 128.4, 128.4, 128.3, 128.2, 128.2, 128.2, 128.1, 128.1, 128.0, 128.0, 128.0, 127.9, 127.9, 127.8, 127.7, 127.7, 127.6, 127.6, 127.4, 125.8, 125.2, 114.3, 114.2, 96.2 (d, *J* = 6.1 Hz, C1 N<sub>2</sub>-isomer), 96.1 (d, *J* = 6.1 Hz, C1 N<sub>1</sub>-isomer), 78.6 (C3 N<sub>1</sub>-isomer or N<sub>2</sub>-isomer), 78.4 (C3 N<sub>1</sub>-isomer or N<sub>2</sub>-isomer), 76.4 (C4 N<sub>2</sub>-isomer), 75.1 (2 C, CH<sub>2</sub>Ph), 76.0 (C4 N<sub>1</sub>-isomer), 74.5 (d, *J* = 9.6 Hz, C2 N<sub>1</sub>-isomer), 74.3 (d, *J* = 9.3 Hz, C2 N<sub>2</sub>-isomer), 73.5 (CH<sub>2</sub>Ph), 72.9 (CH<sub>2</sub>Ph), 72.6 (CH<sub>2</sub>Ph), 72.5 (CH<sub>2</sub>Ph), 70.1 (d, *J* = 5.6 Hz, OP(O)OCH<sub>2</sub>Ph), 70.0 (d, *J* = 5.7 Hz, OP(O)OCH<sub>2</sub>Ph), 69.7 (d, *J* = 5.4 Hz, OP(O)OCH<sub>2</sub>Ph), 69.6 (d, *J* = 5.5 Hz, OP(O)OCH<sub>2</sub>Ph), 67.9 (C5 N<sub>2</sub>-isomer), 66.5 (C5 N<sub>1</sub>-isomer), 56.5 (CH<sub>2</sub>Ph PMB), 55.2 (2 C, OCH<sub>3</sub>), 50.4 (CH<sub>2</sub>Ph PMB); **<sup>31</sup>P NMR** δ<sub>P</sub> (162 MHz, CDCl<sub>3</sub>) -2.88 (s), -2.79 (s); **HRMS** (ES<sup>+</sup>) *m/z* [Found: (M+H)<sup>+</sup> 869.3370 C<sub>49</sub>H<sub>51</sub>N<sub>4</sub>O<sub>9</sub>P requires (M+H)<sup>+</sup>, 869.3315].

#### S2.14.2. Compound 21

A suspension of the protected 1-phosphate regioisomeric mixture (190 mg, 0.22 mmol, 1.0 equiv), 10% Pd/C (140 mg, 0.13 mmol, 0.6 equiv), 20% Pd(OH)<sub>2</sub>/C (92 mg, 0.13 mmol, 0.6 equiv) and 5% aq. NaHCO<sub>3</sub> (739 μL, 0.44 mmol, 2.0 equiv) in a mixture of EtOH/THF (4.4 mL, 1.5/1 v/v) was stirred under an atmosphere of hydrogen (1 atm, balloon) at room temperature for 24 h. TLC analysis (hexane/EtOAc, 1/2) showed complete conversion of starting material to a lower R<sub>f</sub> spot. The reaction mixture was filtered through Celite®, followed by solvent removal *in vacuo*. Purification *via* strong anion exchange chromatography was conducted manually using a Bio-Scale™ Mini UNOsphere™ Q (strong anion exchange) cartridge) and lyophilisation afforded **21** as a white powder (53 mg, 0.16 mmol, 72%). R<sub>f</sub> 0.42 (H<sub>2</sub>O/MeCN, 1/2); [α]<sub>D</sub><sup>22</sup> -3.0 (c. 1.0, H<sub>2</sub>O); **<sup>1</sup>H NMR** (400 MHz; D<sub>2</sub>O) δ 5.41 (1 H, dd, *J* = 7.9, 1.7 Hz, H<sub>1</sub>), 5.08 (1 H, d, *J* = 9.7 Hz, H<sub>5</sub>), 4.05 (1 H, app. t, *J* = 9.6 Hz, H<sub>4</sub>), 4.02 – 3.97 (2 H, m, H<sub>2</sub> and H<sub>3</sub>); **<sup>13</sup>C NMR** (101 MHz; D<sub>2</sub>O) δ 160.8 (C<sub>q</sub> tetrazole), 96.1 (C1), 70.5 (C2), 69.7 (C3), 69.4 (C4), 67.1 (C5); **<sup>31</sup>P NMR** δ<sub>P</sub> (162 MHz, D<sub>2</sub>O) -2.15 (s); **HRMS** (ES<sup>-</sup>) *m/z* [Found: (M-H)<sup>-</sup> 297.0236 C<sub>6</sub>H<sub>10</sub>N<sub>4</sub>O<sub>8</sub>P requires (M-H)<sup>-</sup>, 297.0233].

### S3. HMBC spectrum for N<sub>1</sub>-protected tetrazole 11

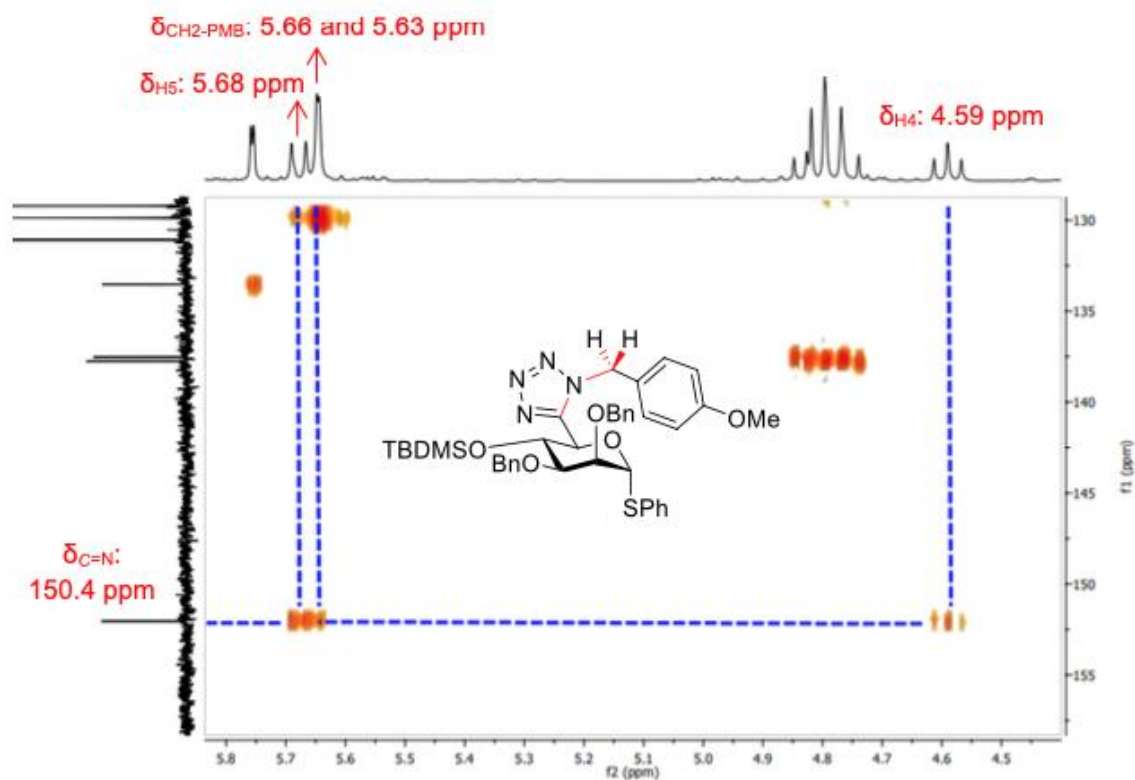

### S4. References

- (1) Dimitriou, E.; Miller, G. J. *Org. Biomol. Chem.* **2019**, *17*, 9321–9335.
- (2) Ahmadipour, S.; Pergolizzi, G.; Rejzek, M.; Field, R. A.; Miller, G. J. *Org. Lett.* **2019**, *21*, 4415–4419.

S5. Spectral Data:  $^1\text{H}$ ,  $^{13}\text{C}$ ,  $^{31}\text{P}$  and HSQC NMR for compounds 2-5, 7-14, 16-18 and 20-21

## Compound 2

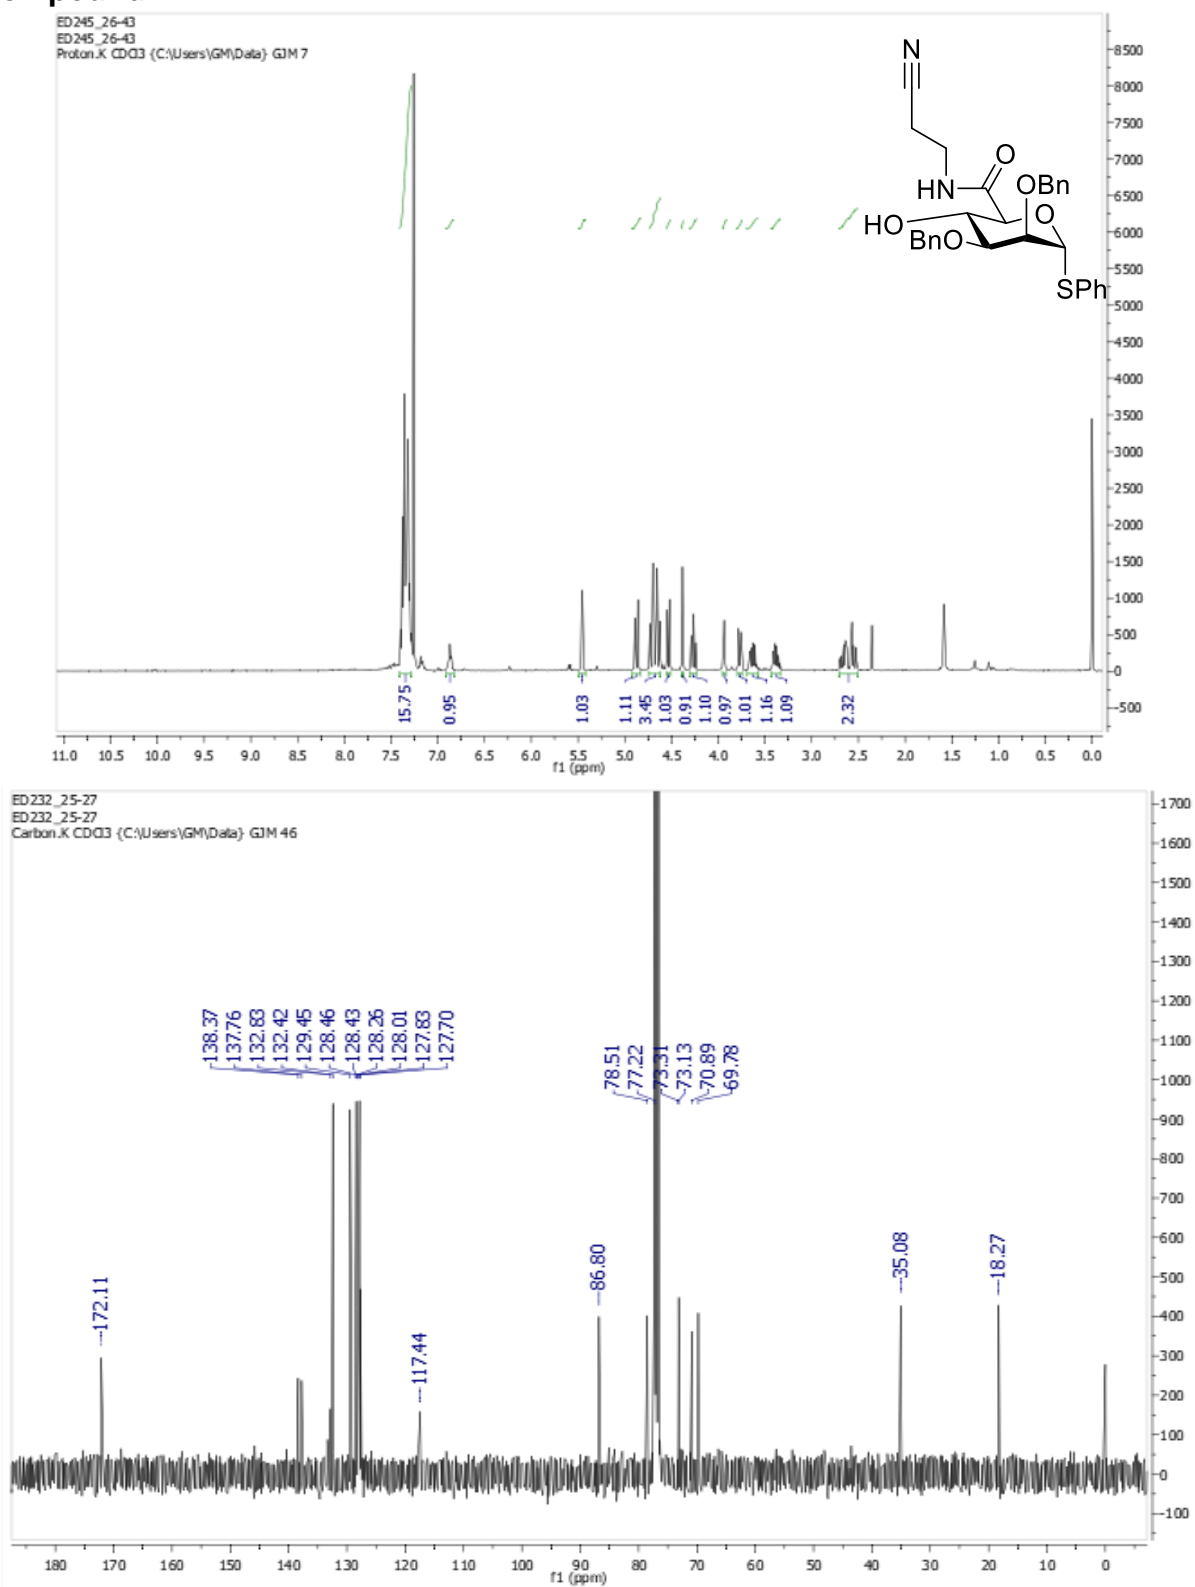

### Compound 3

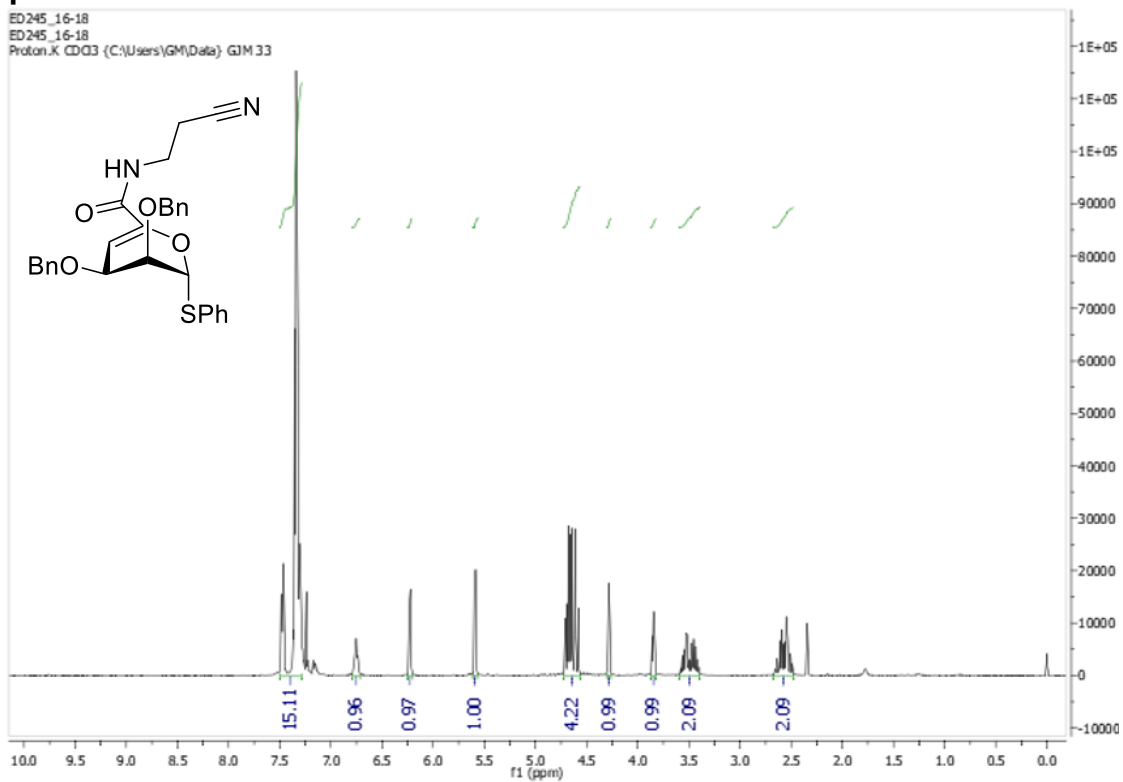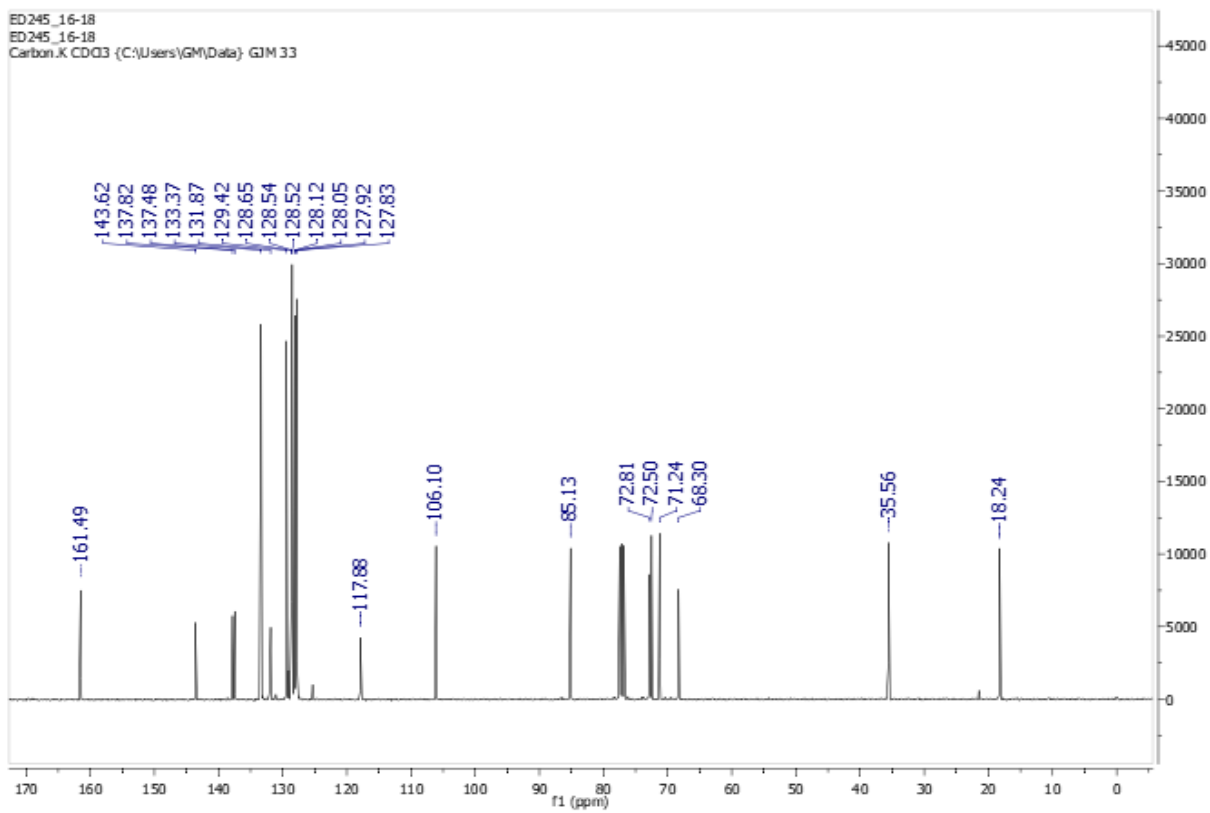



# Compound 4

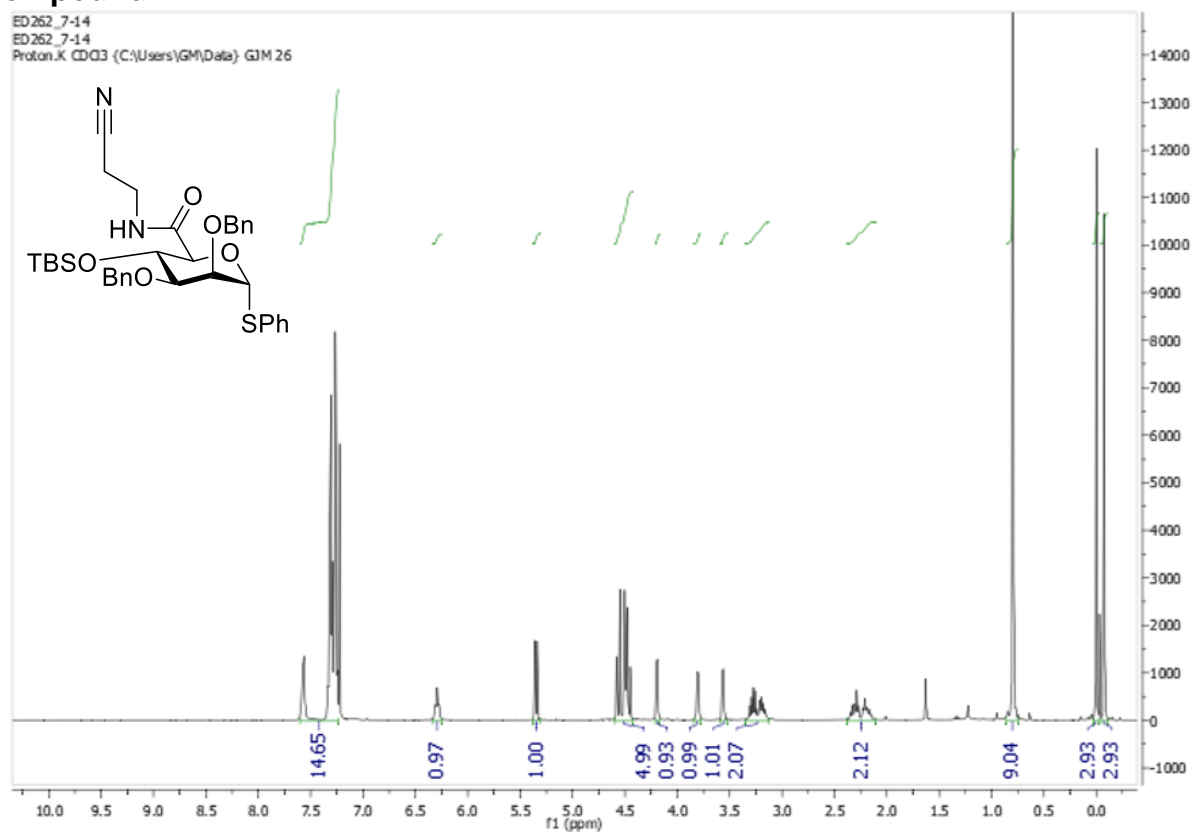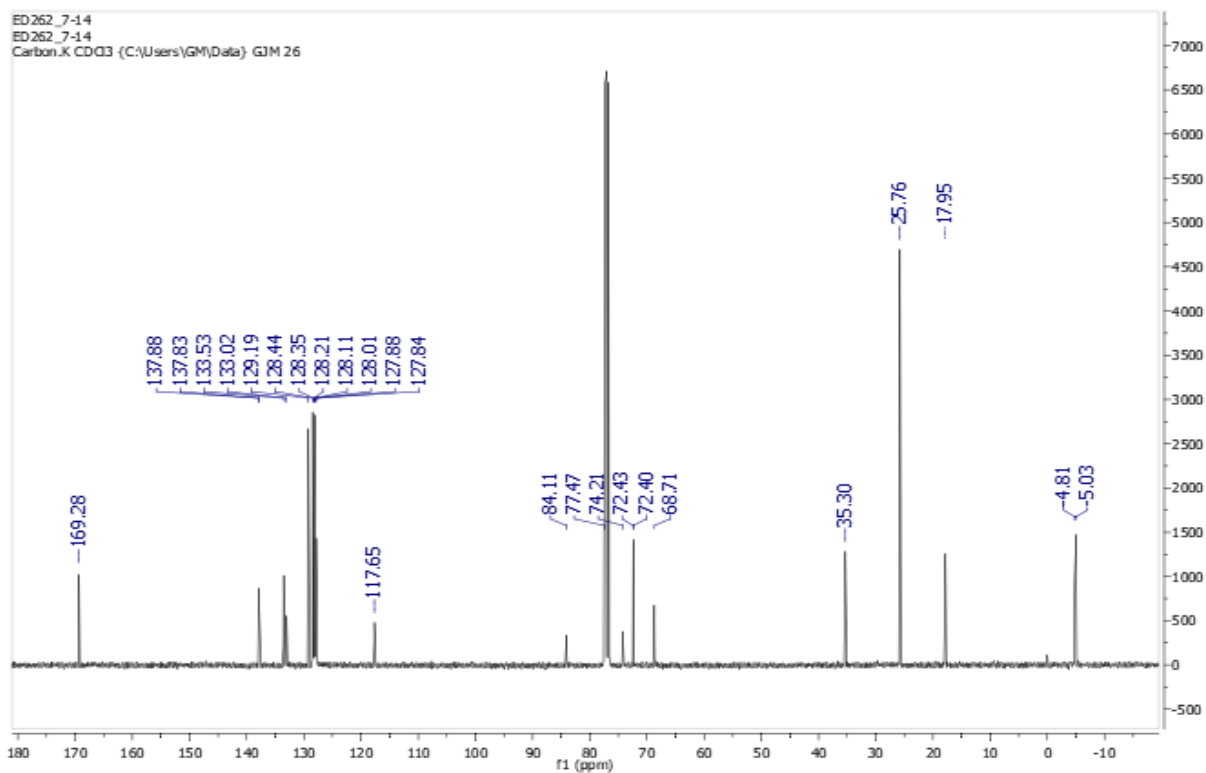

# Compound 5

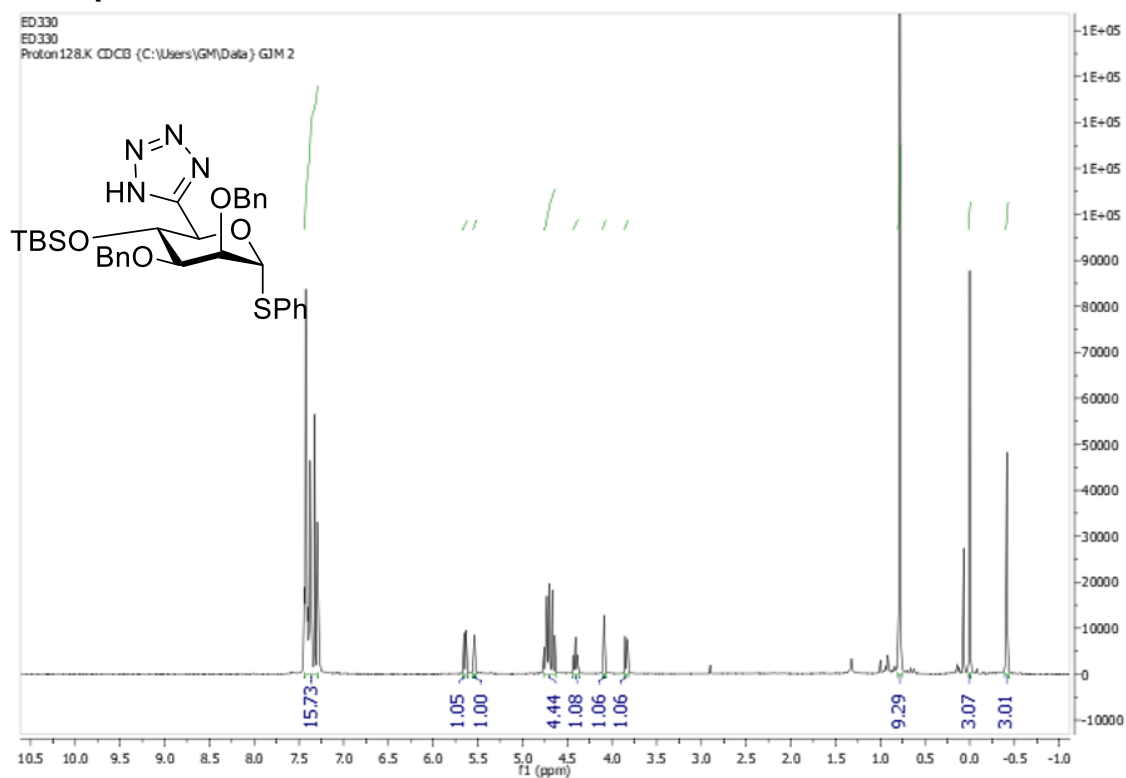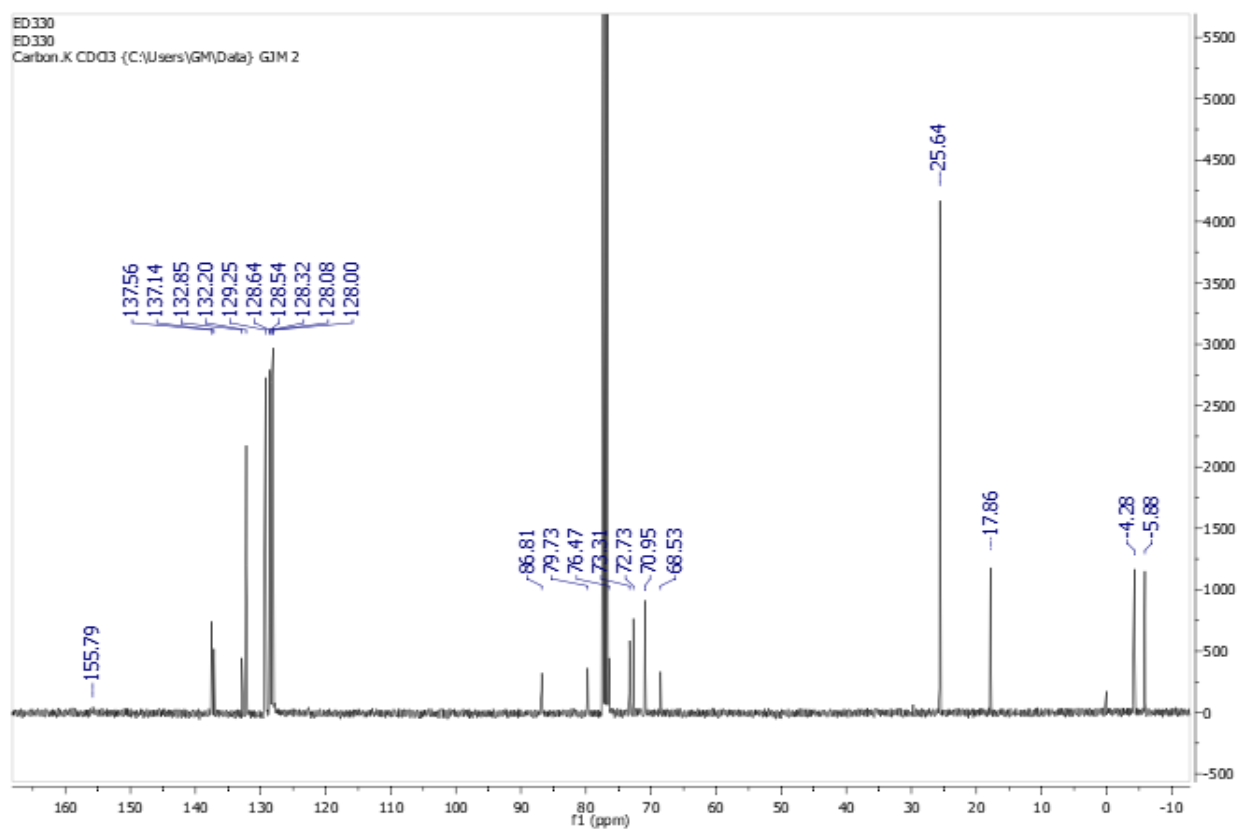

# Phenyl 2,3-di-O-benzyl-6-O-benzoyl-1-thio- $\alpha$ -D-mannopyranoside

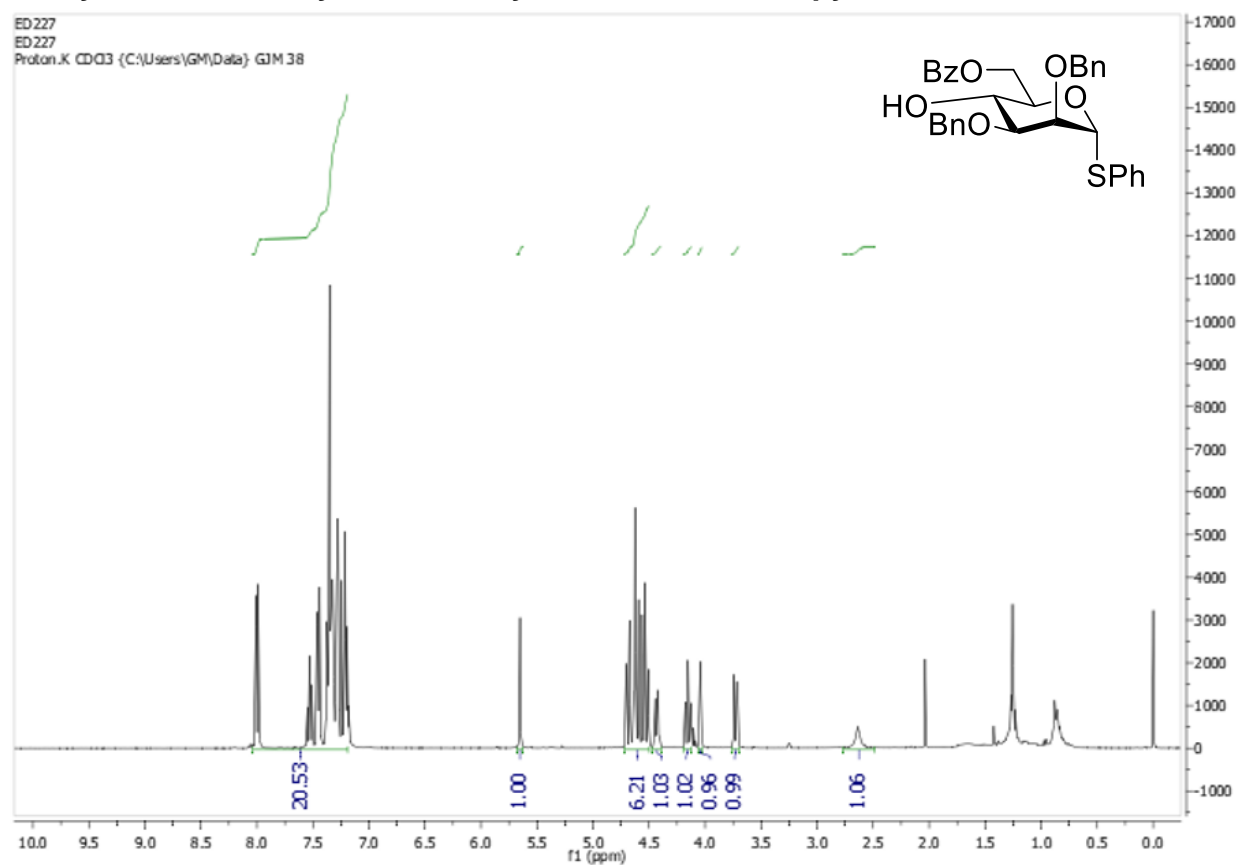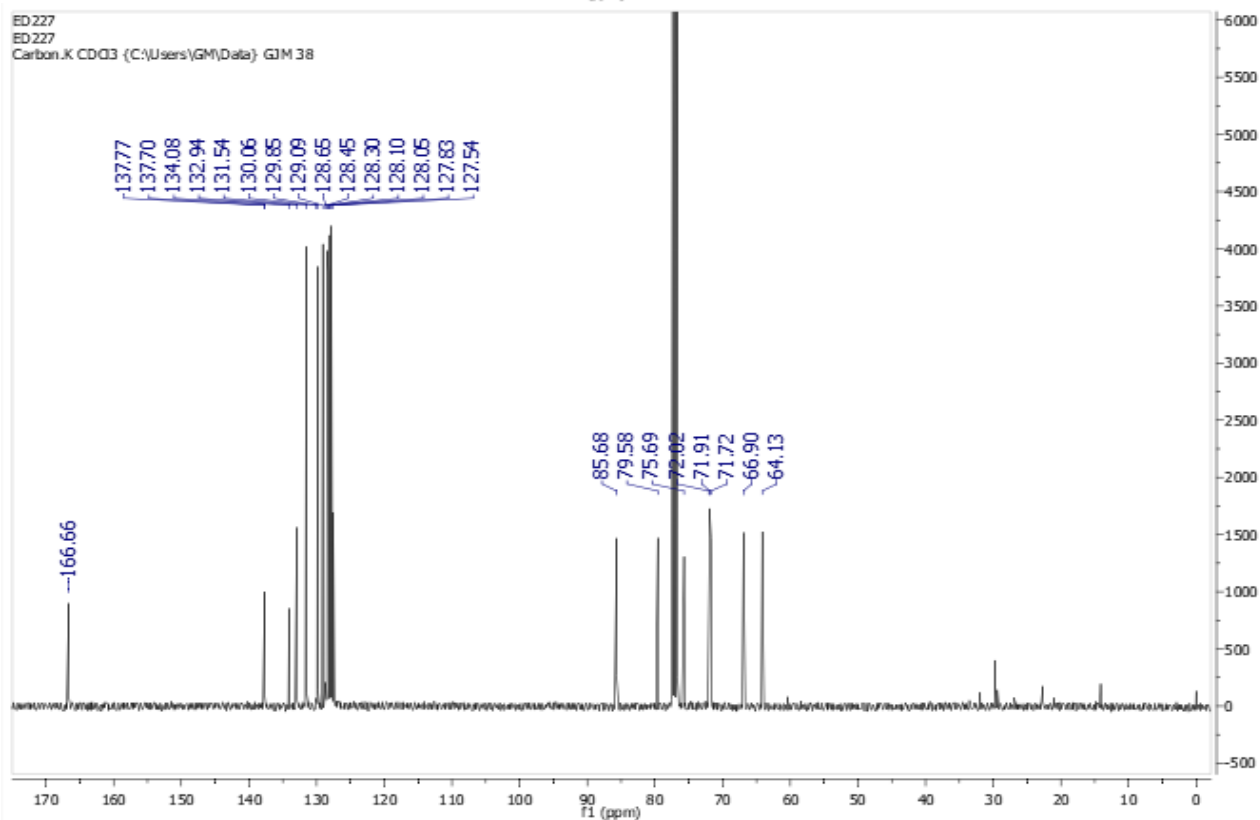

**Phenyl 2,3-di-O-benzyl-4-O-*tert*-butyldimethylsilyl-6-O-benzoyl-1-thio- $\alpha$ -D-mannopyranoside**

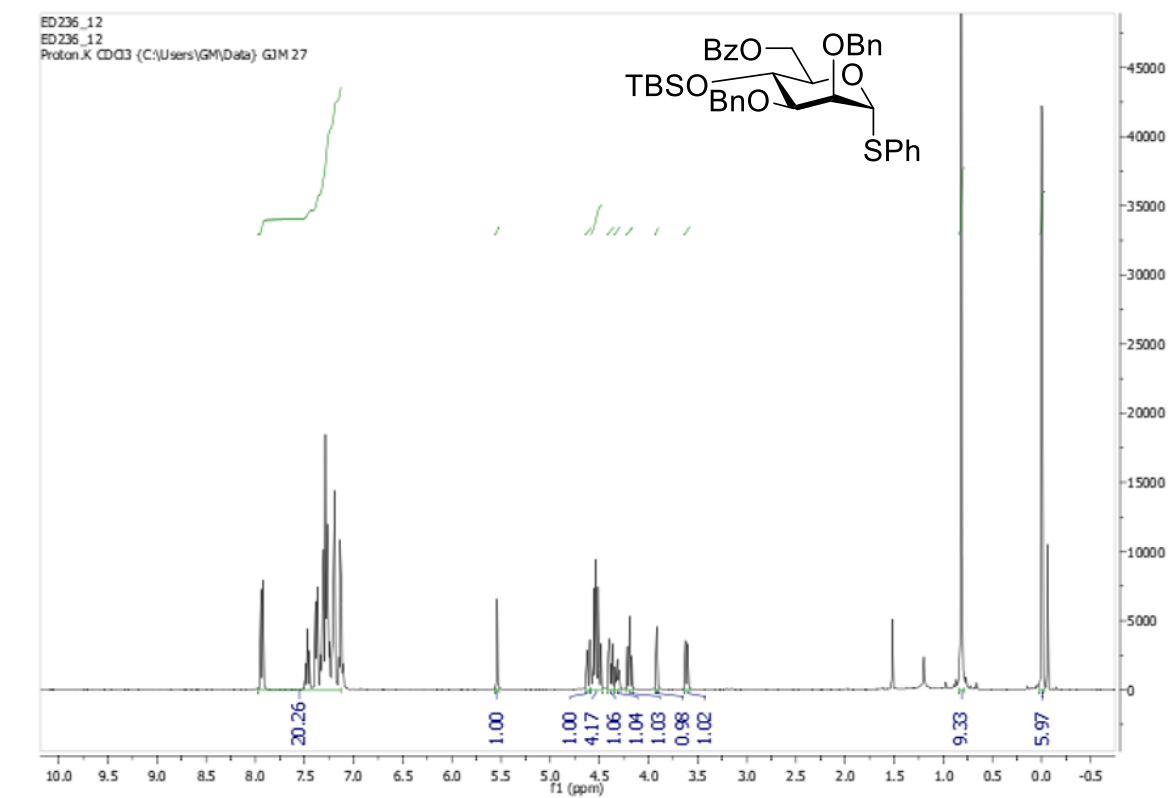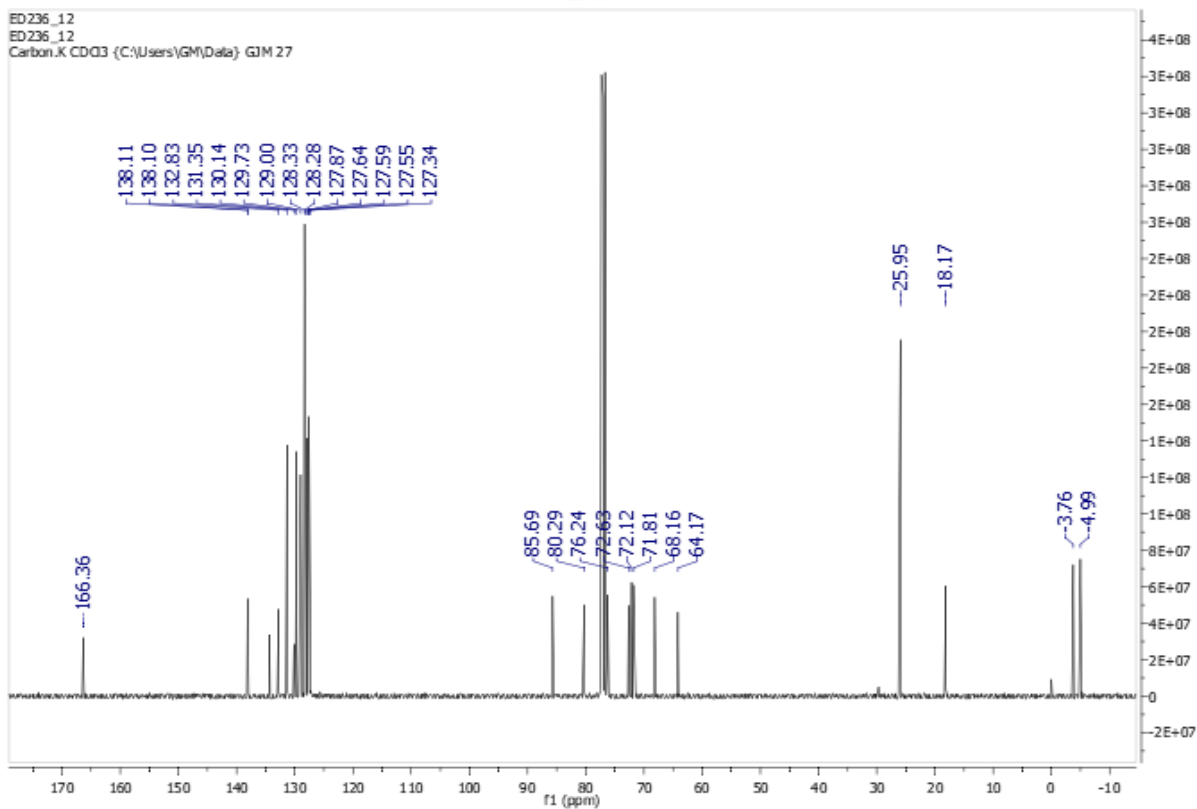

# Compound 7

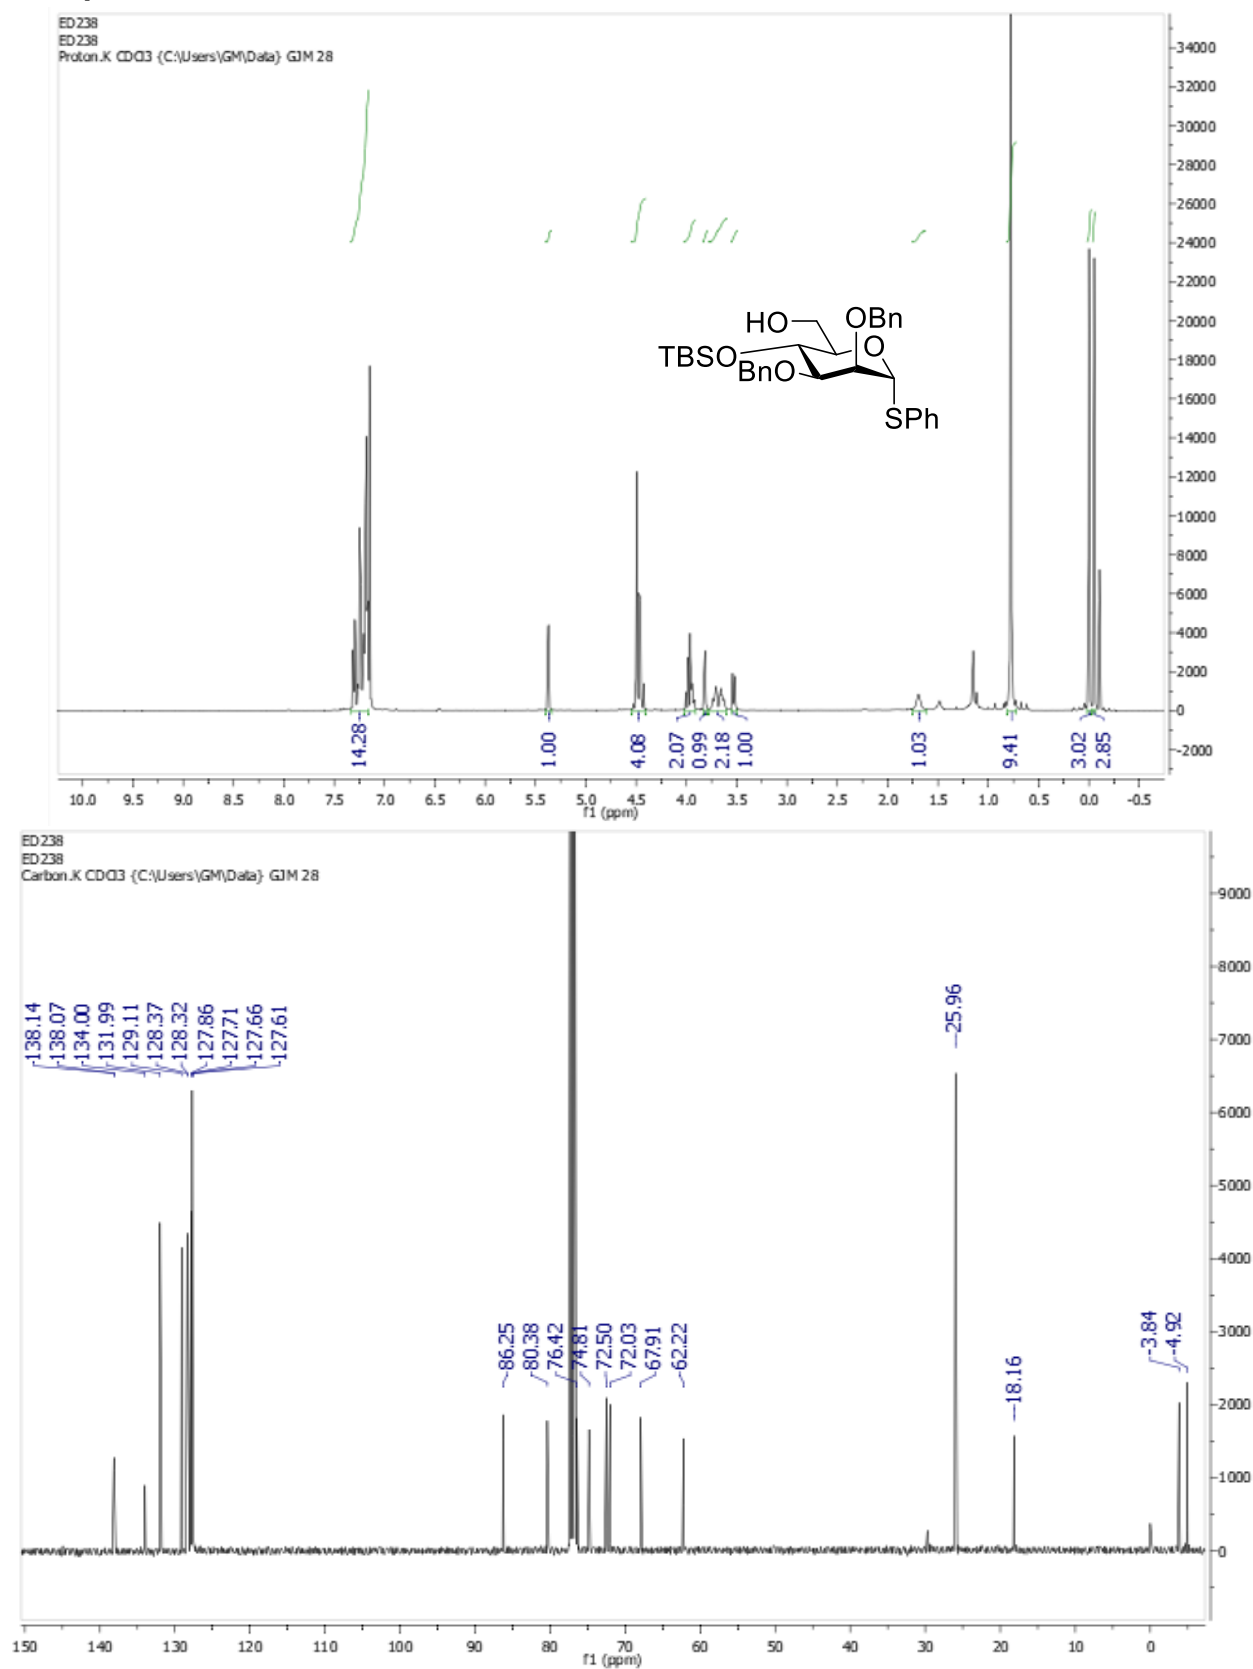

## C6 aldehyde thioglycoside intermediate

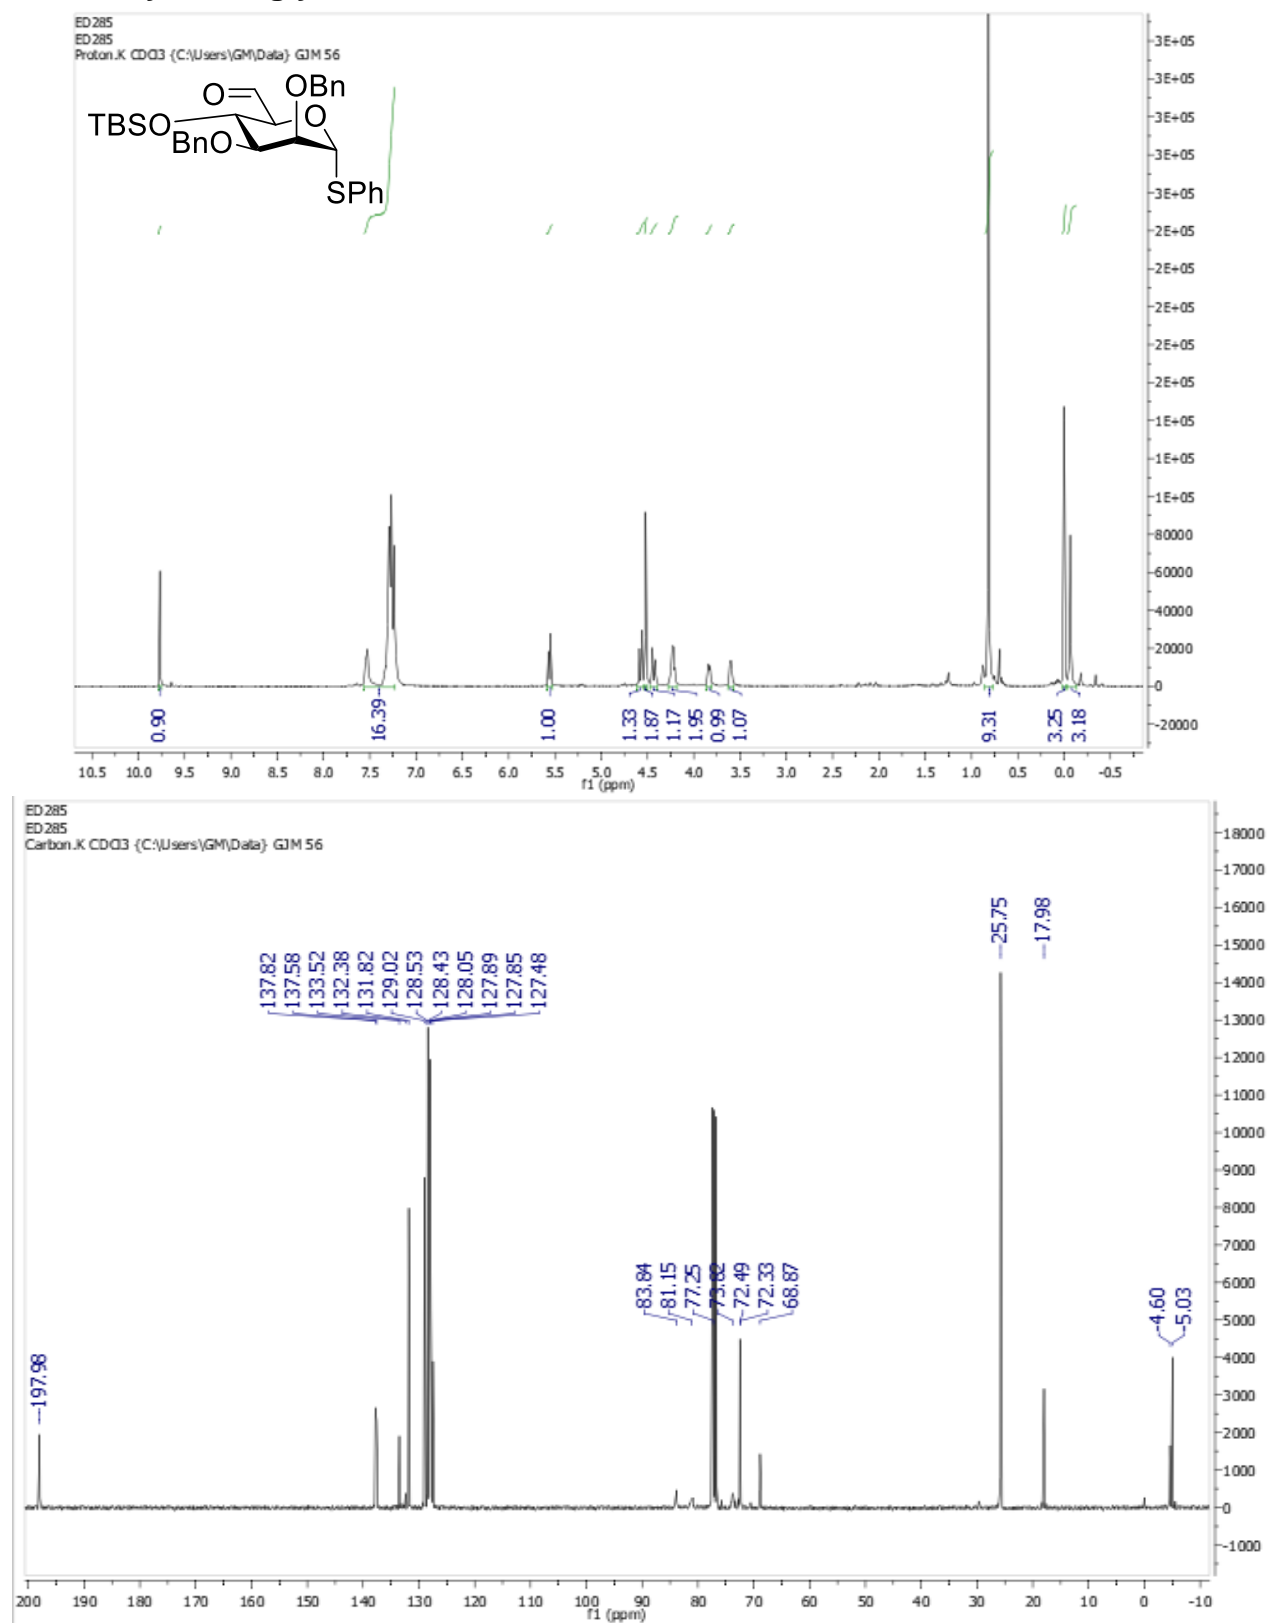

# Compound 8

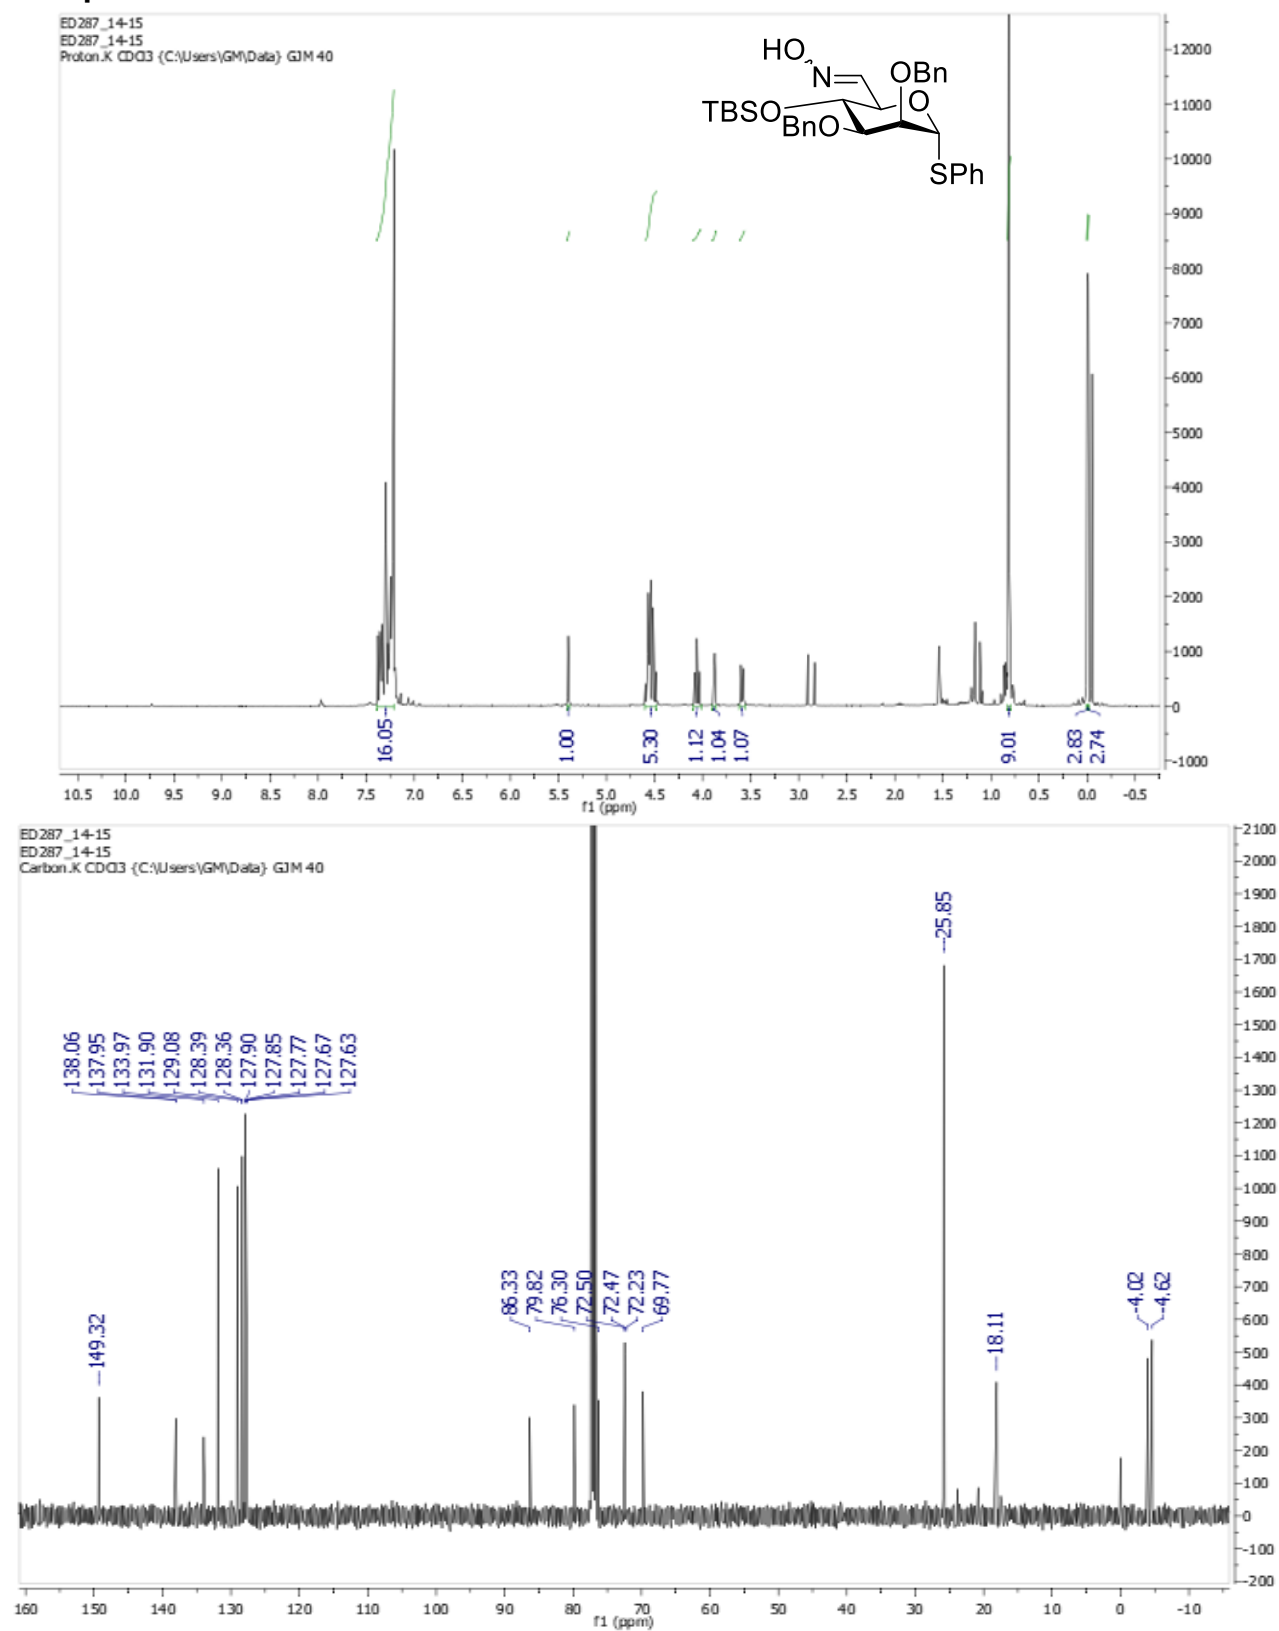



# Compound 9

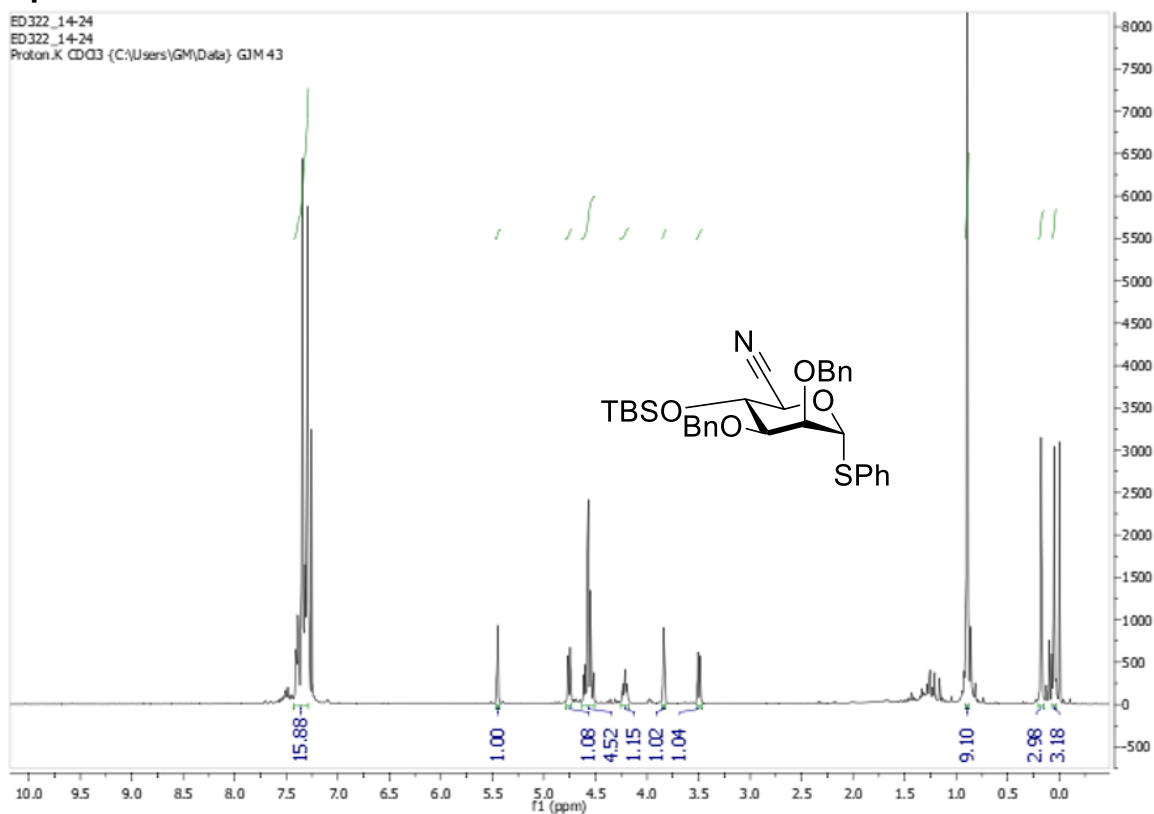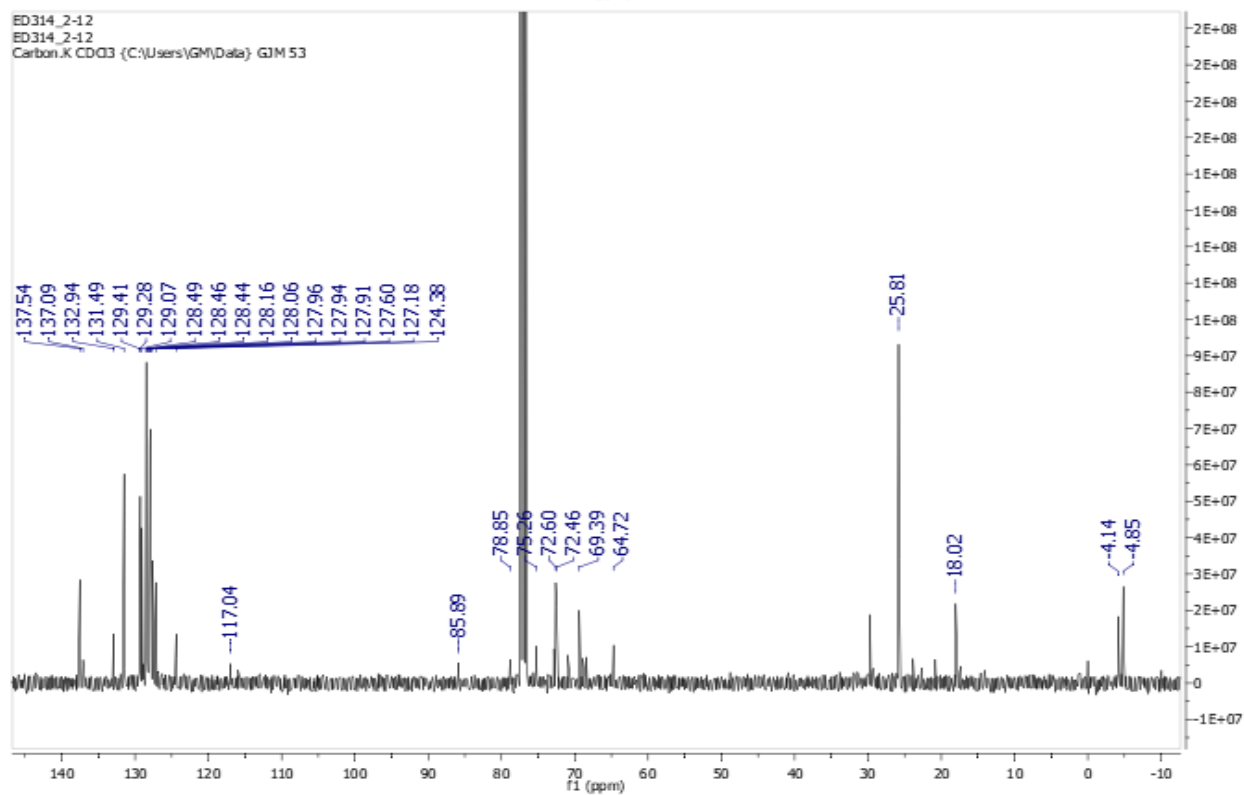

# Compound 10

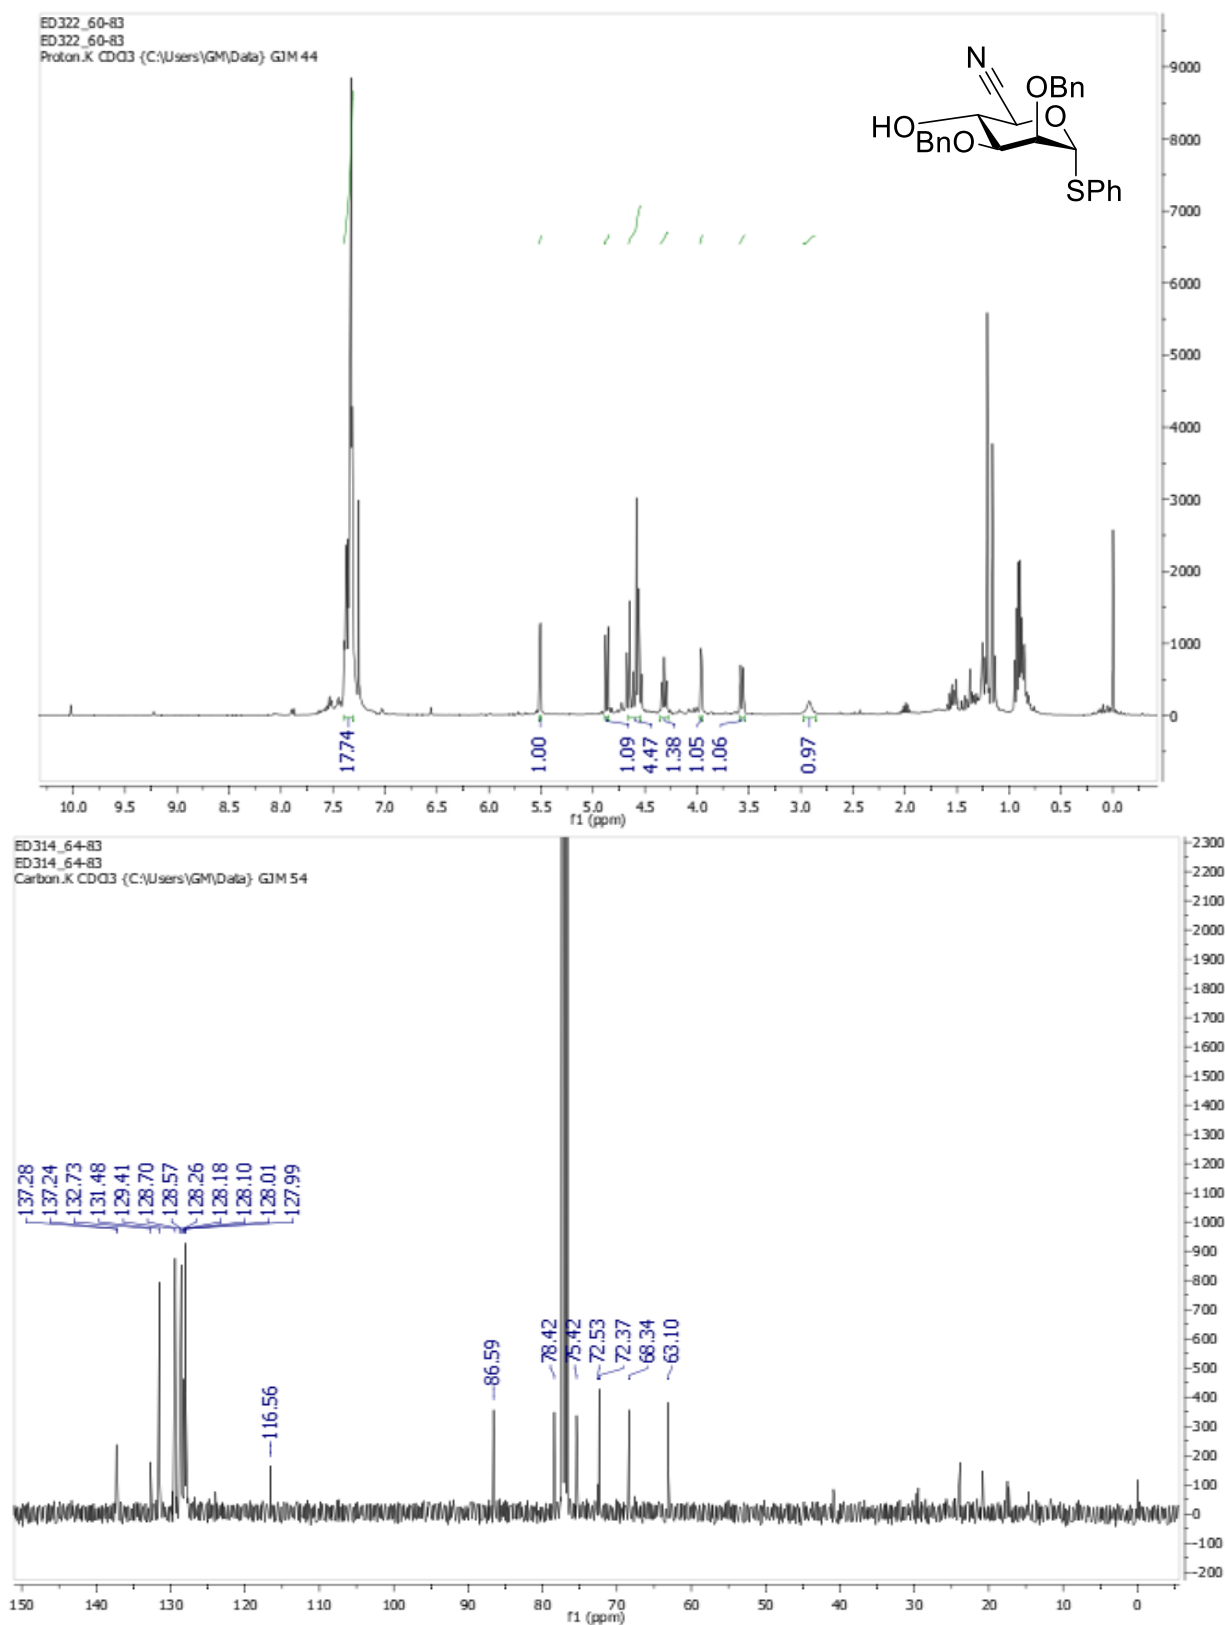

## Compound 11

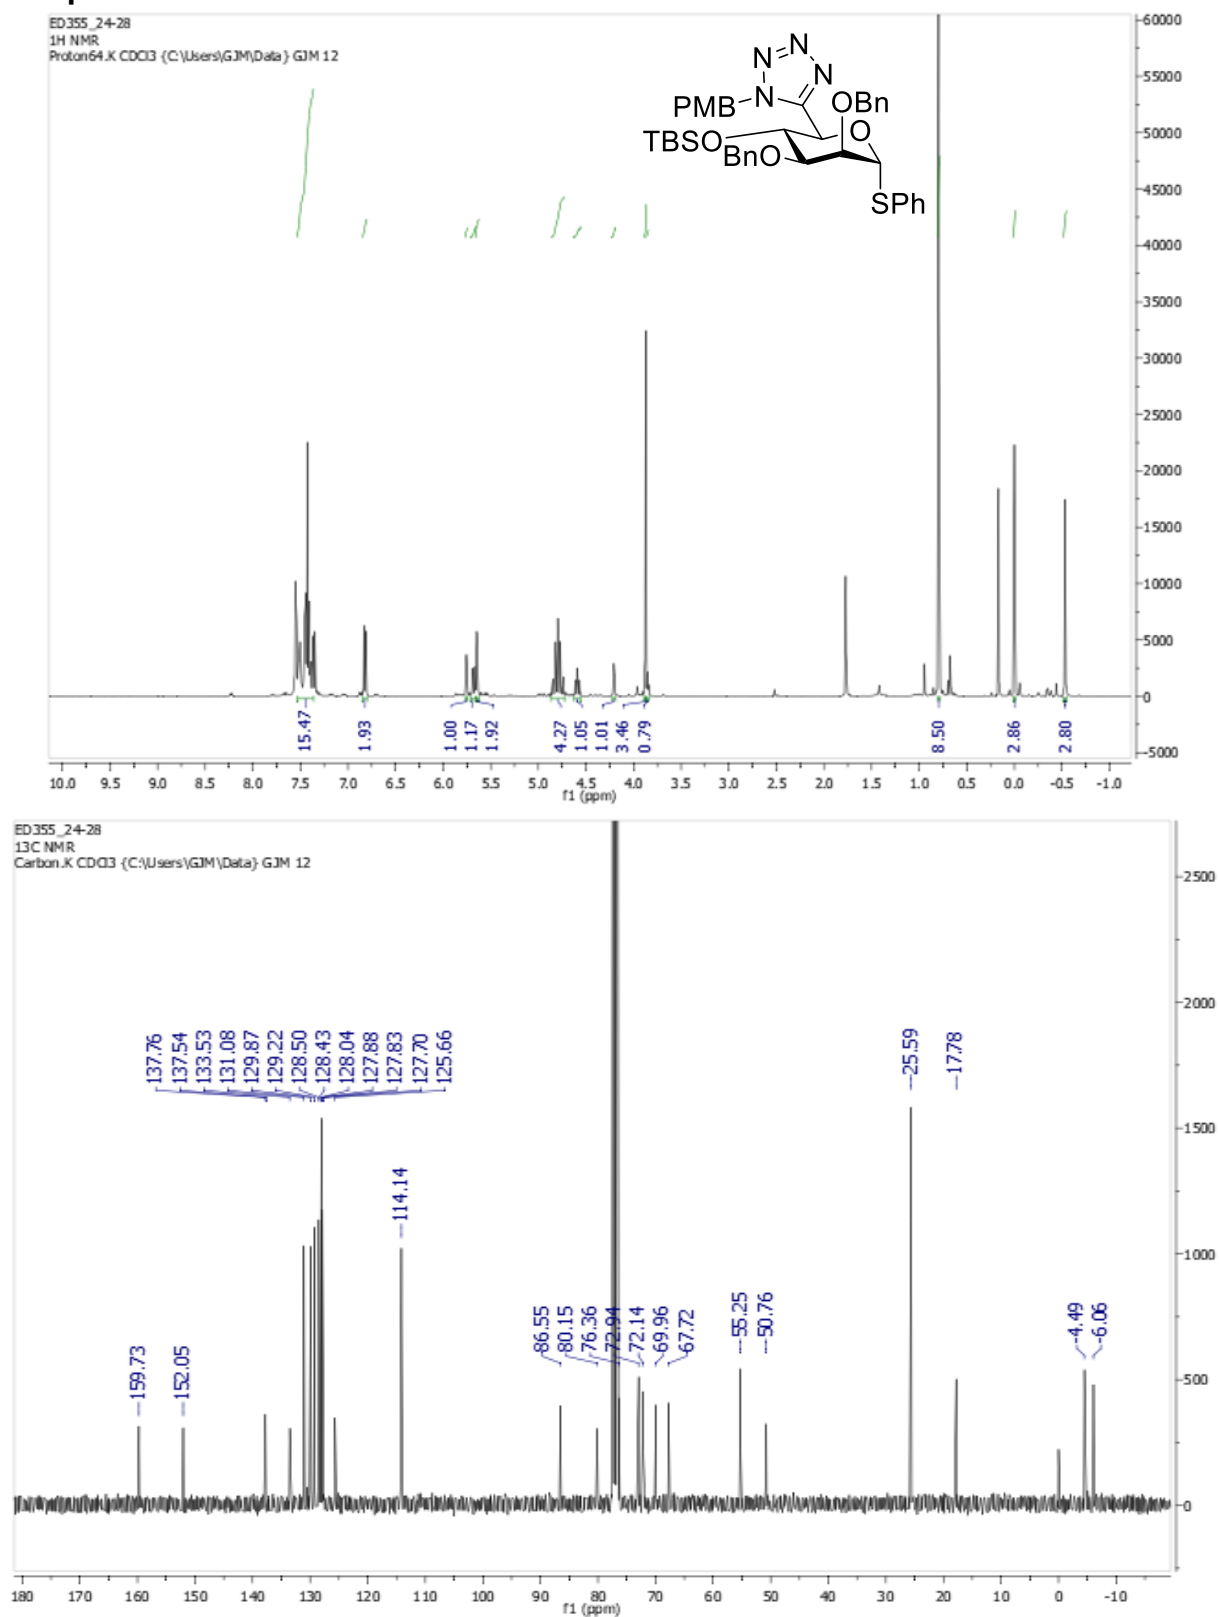

## Coupled HSQC

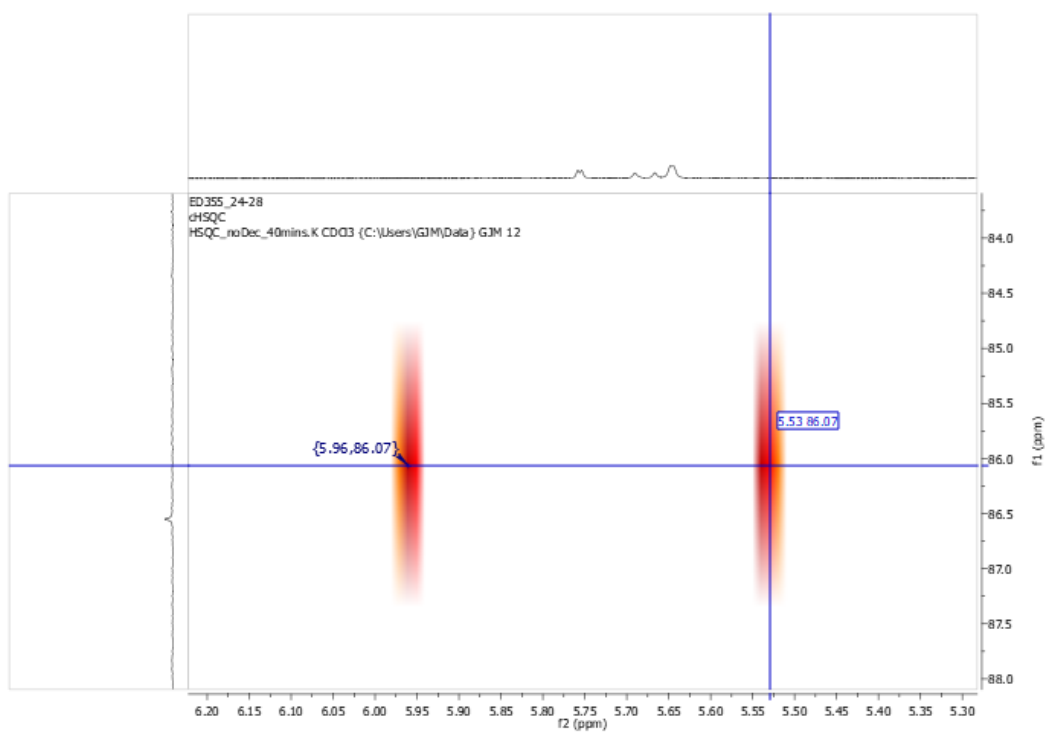

## HMBC

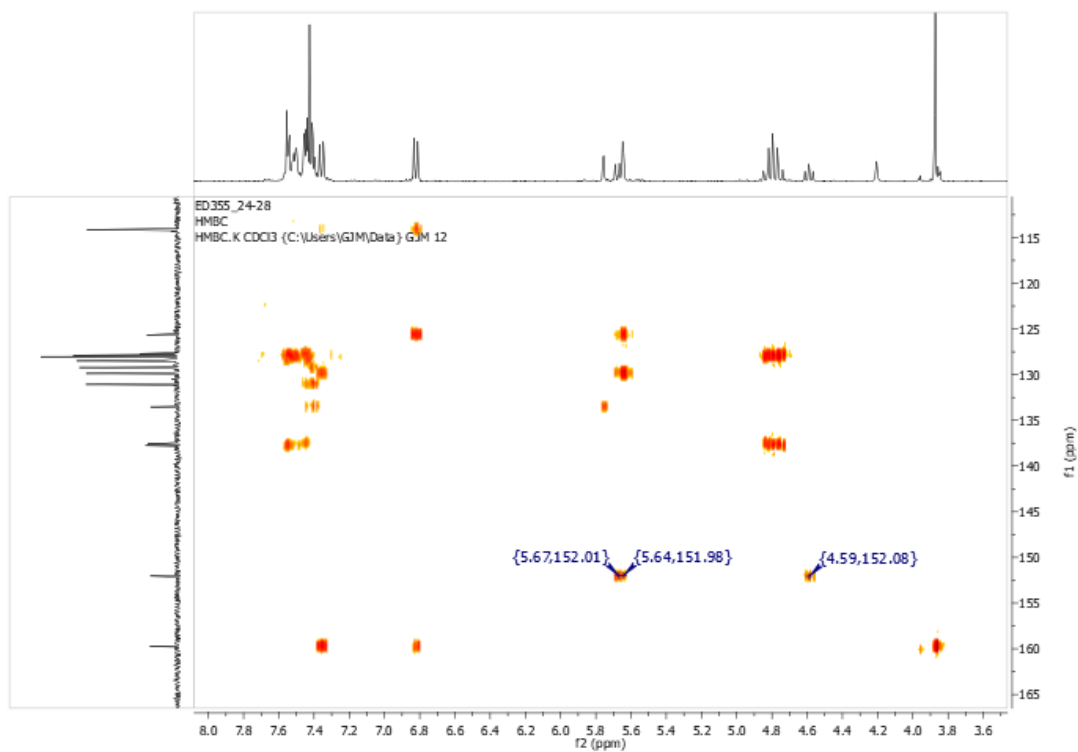

## Compound 12

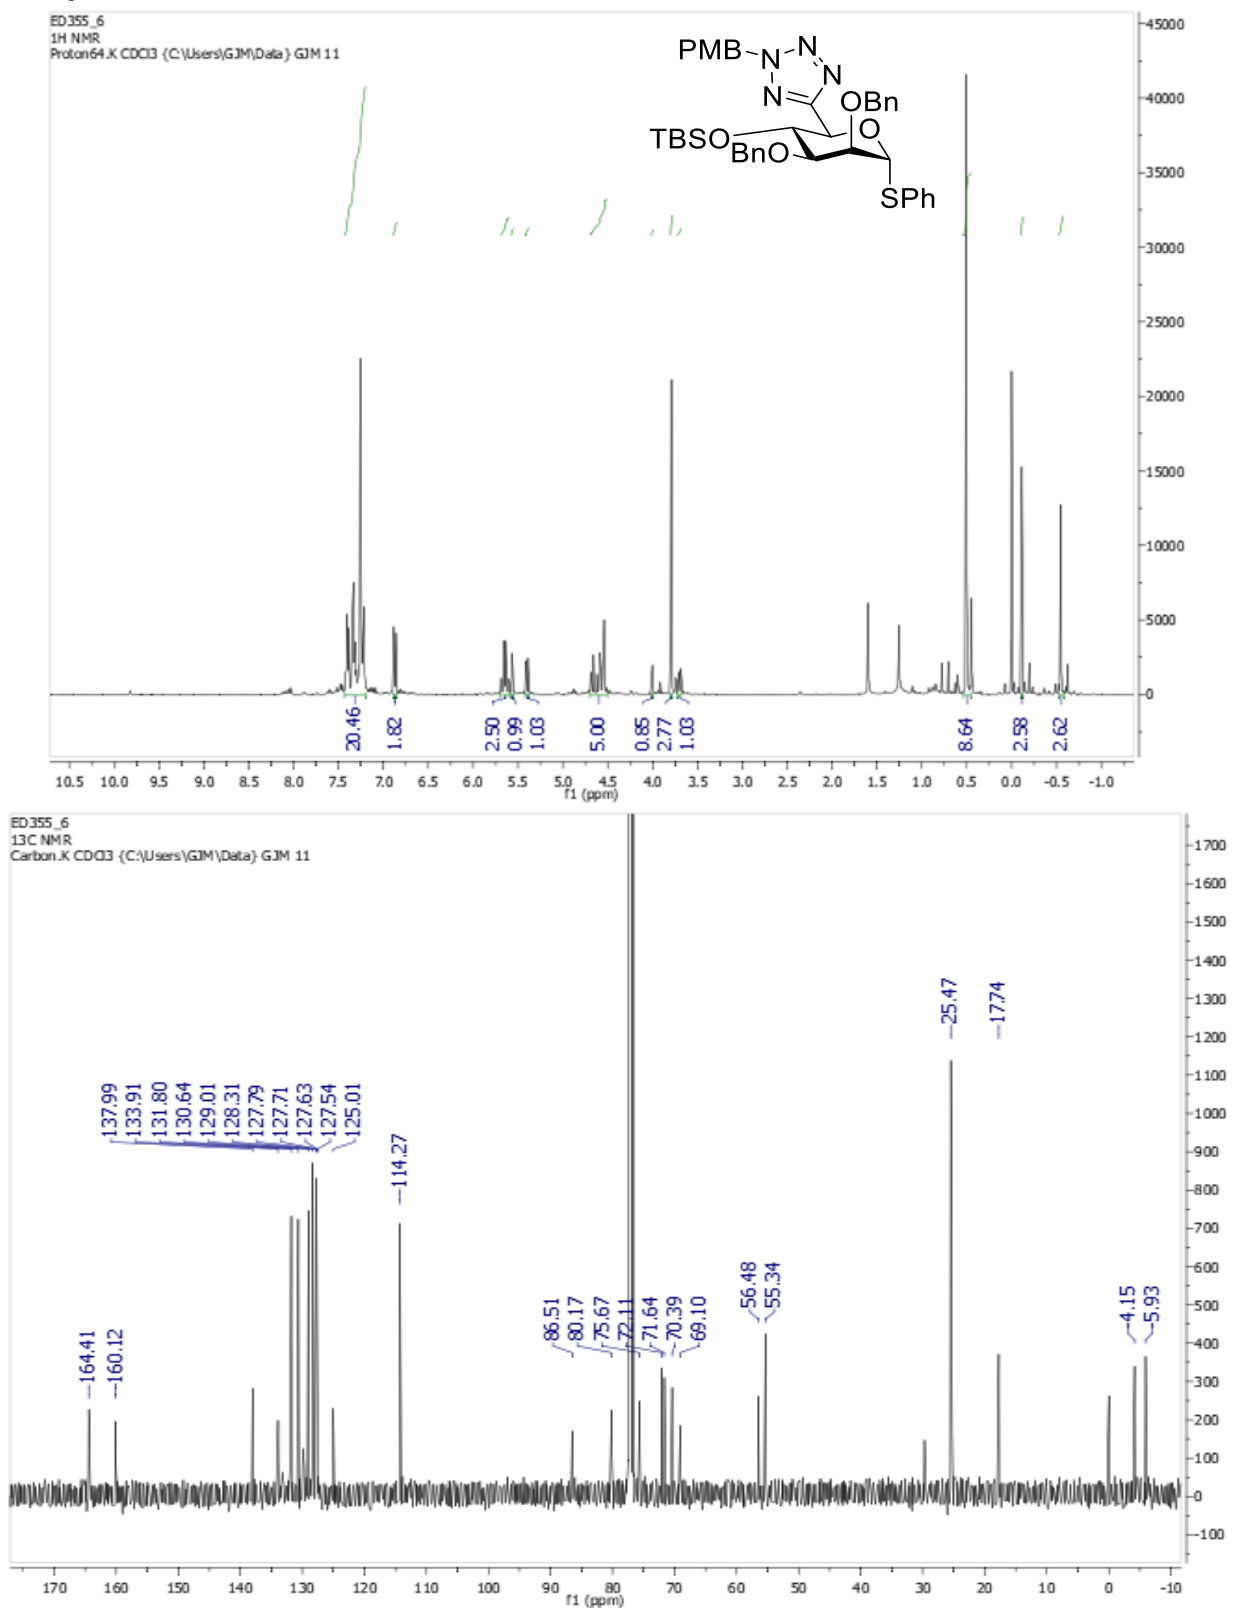

## Coupled HSQC

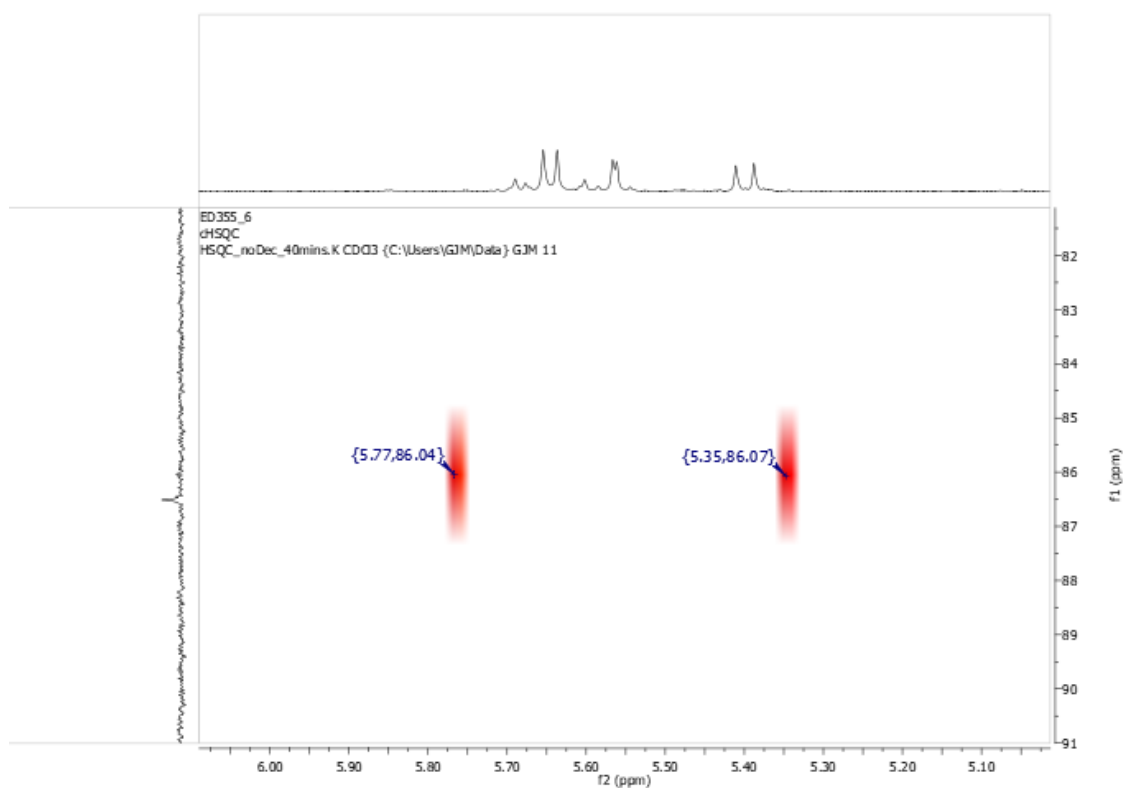

## HMBC

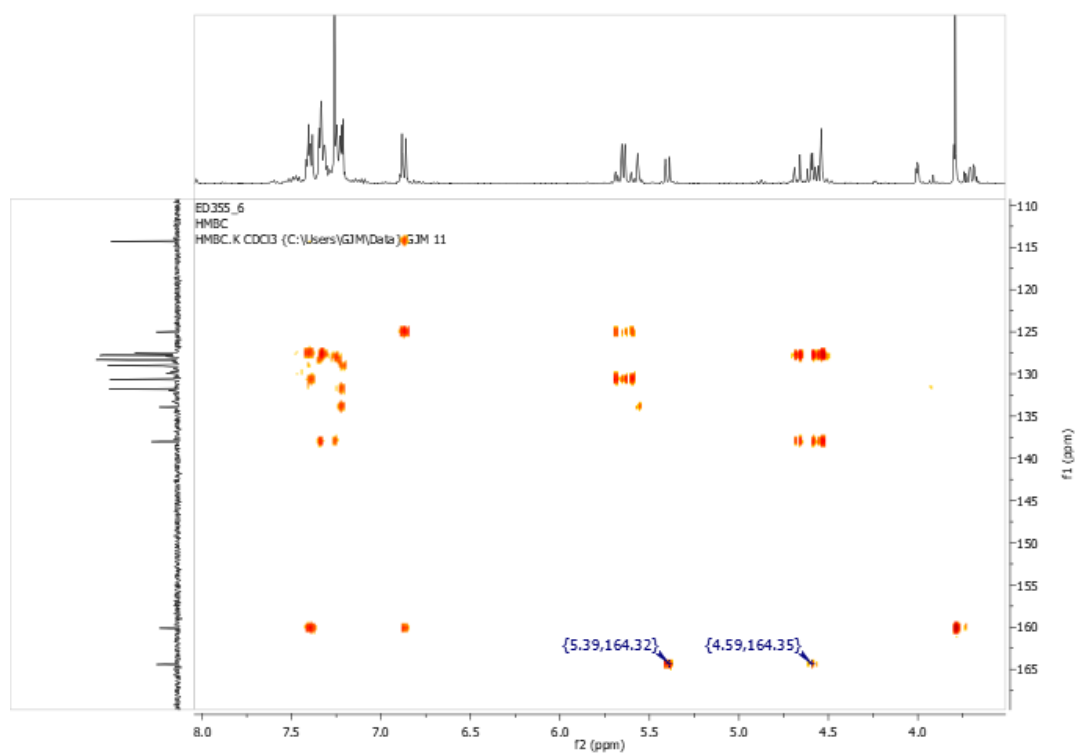

**Phenyl 2,3-di-O-benzyl-4-O-*tert*-butyldimethylsilyl-6-C-(1*H*-tetrazolyl)-1-thio- $\alpha$ -D-mannopyranoside triethylammonium salt**

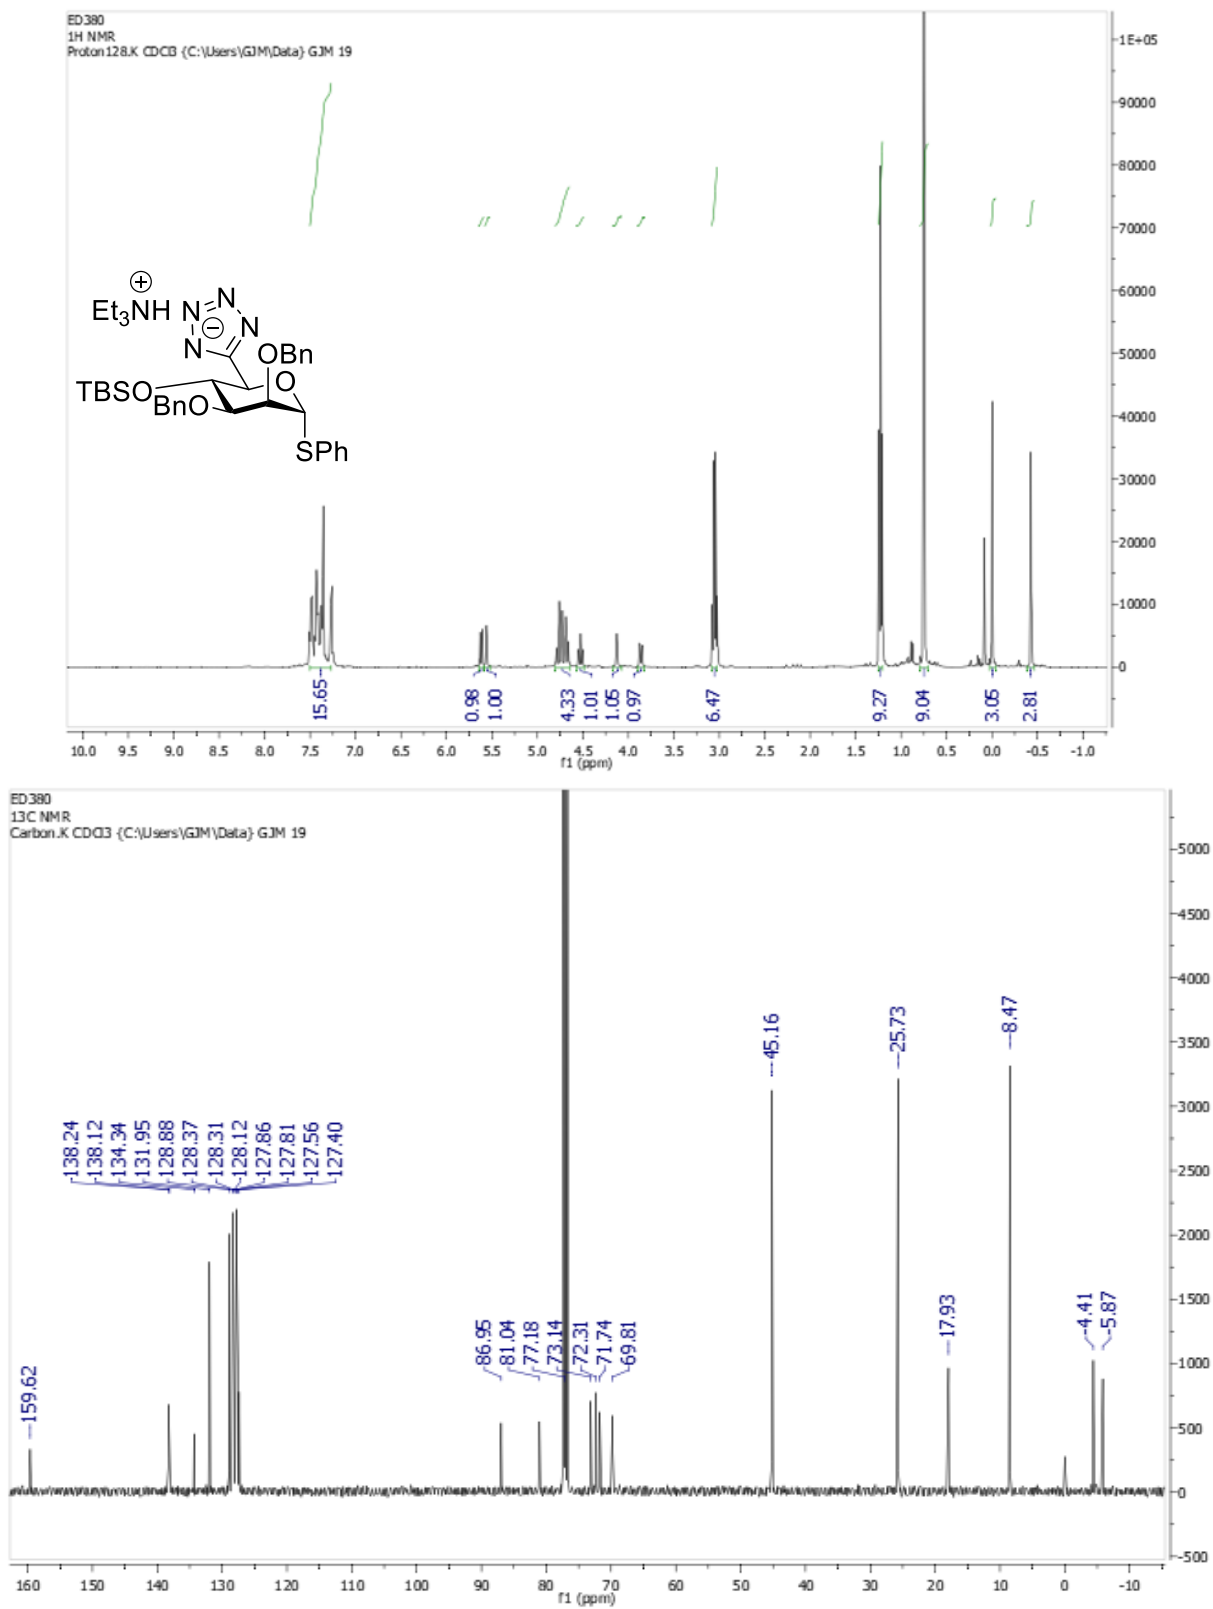



## Compounds 13 and 14

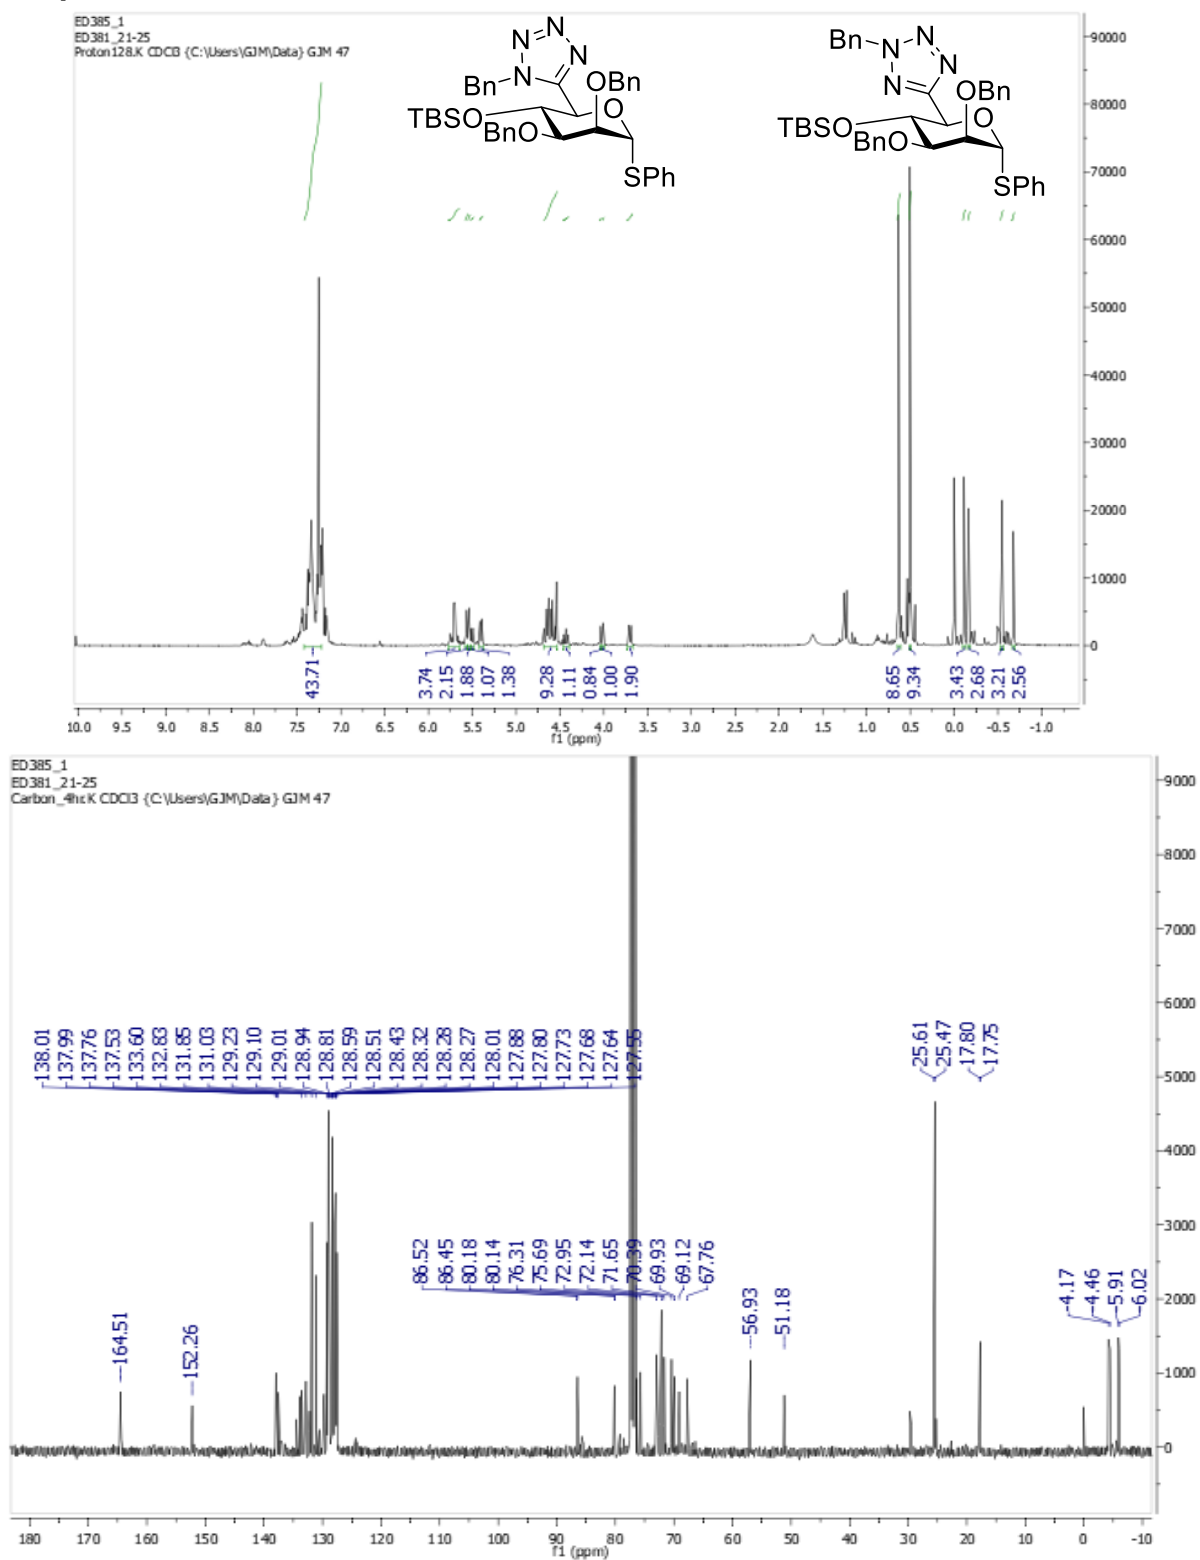

## Coupled HSQC

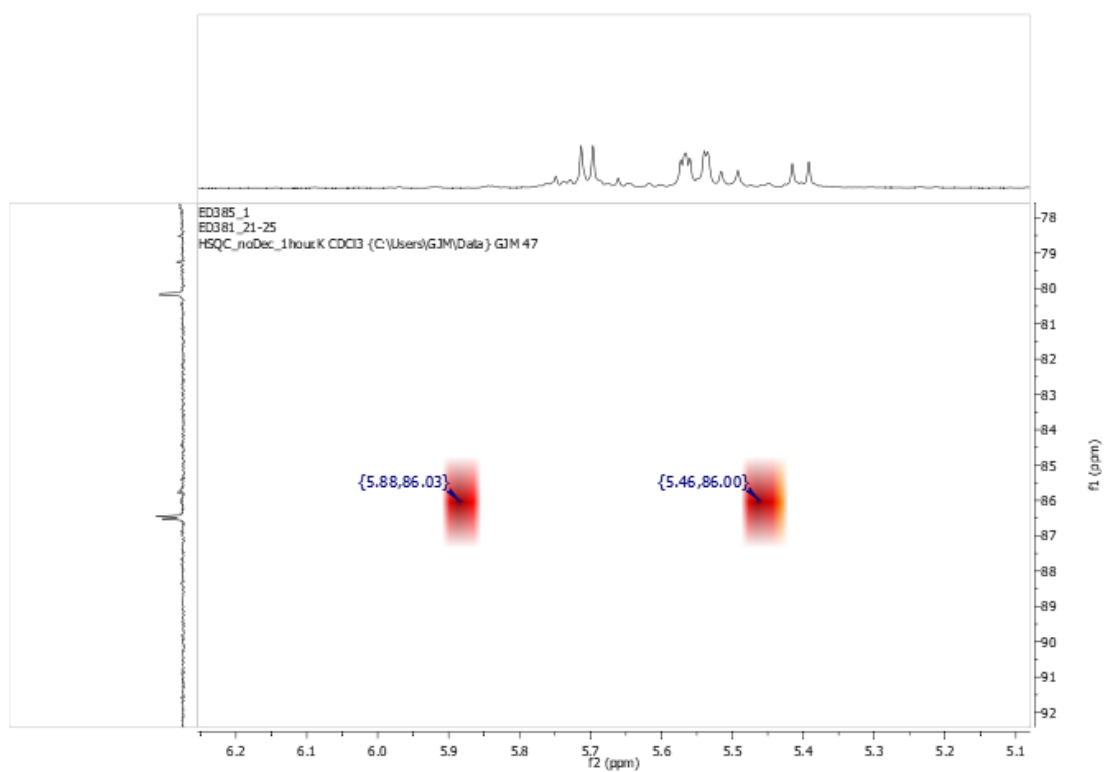

## HMBC

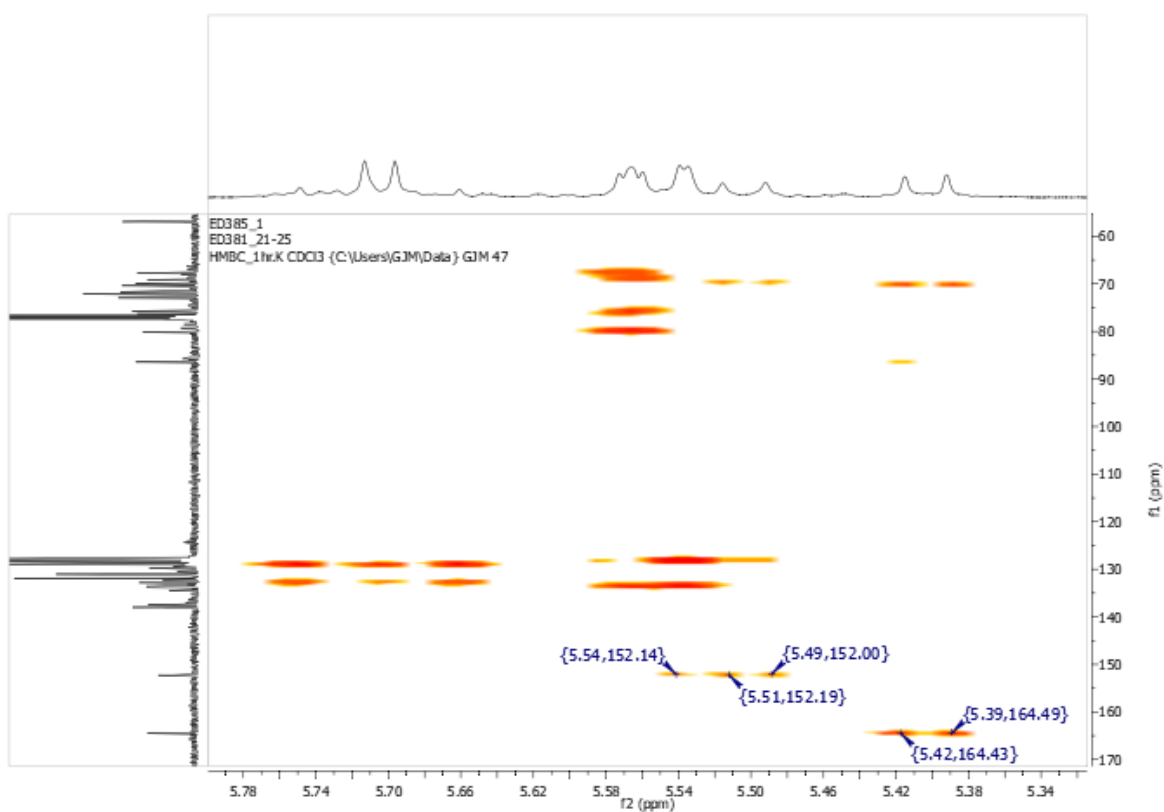

## C-6 Aldehyde thioglycoside intermediate

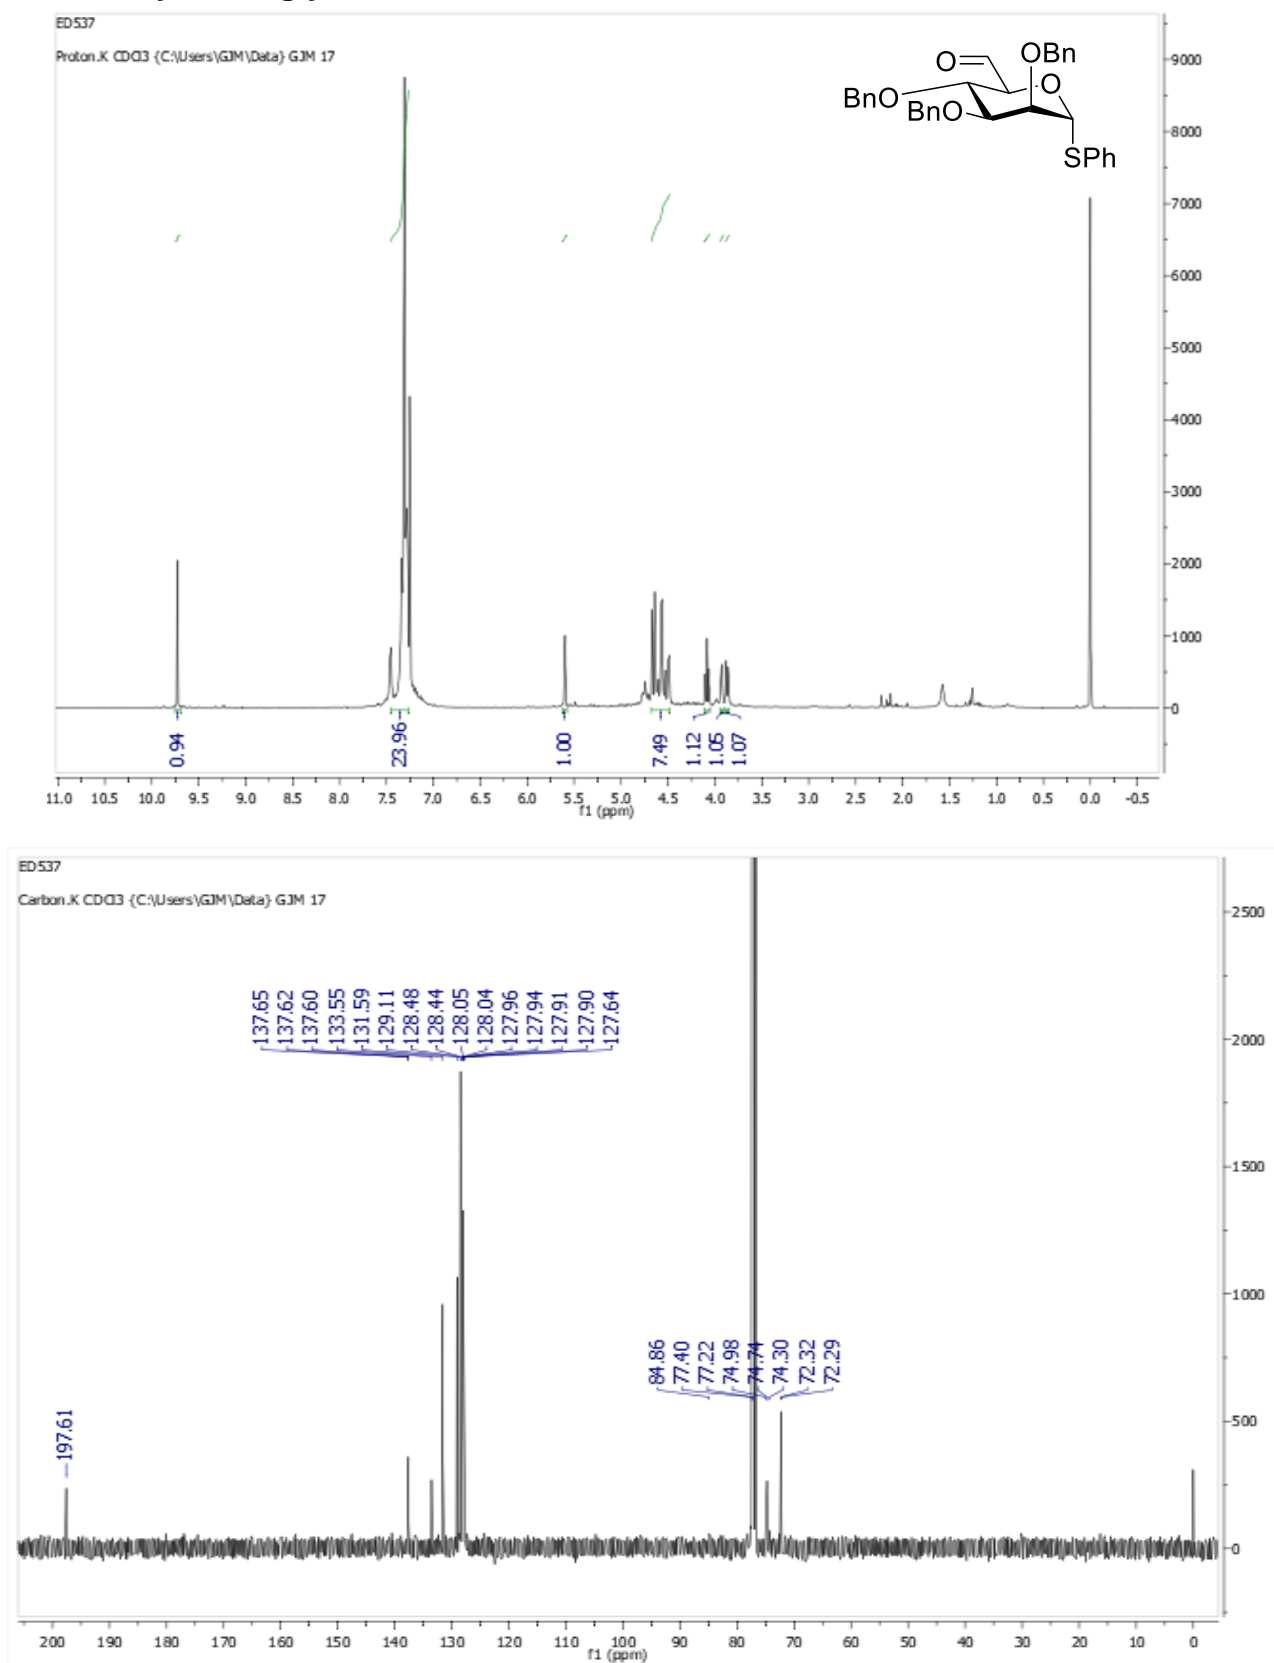

## C-6 Oxime thioglycoside intermediate

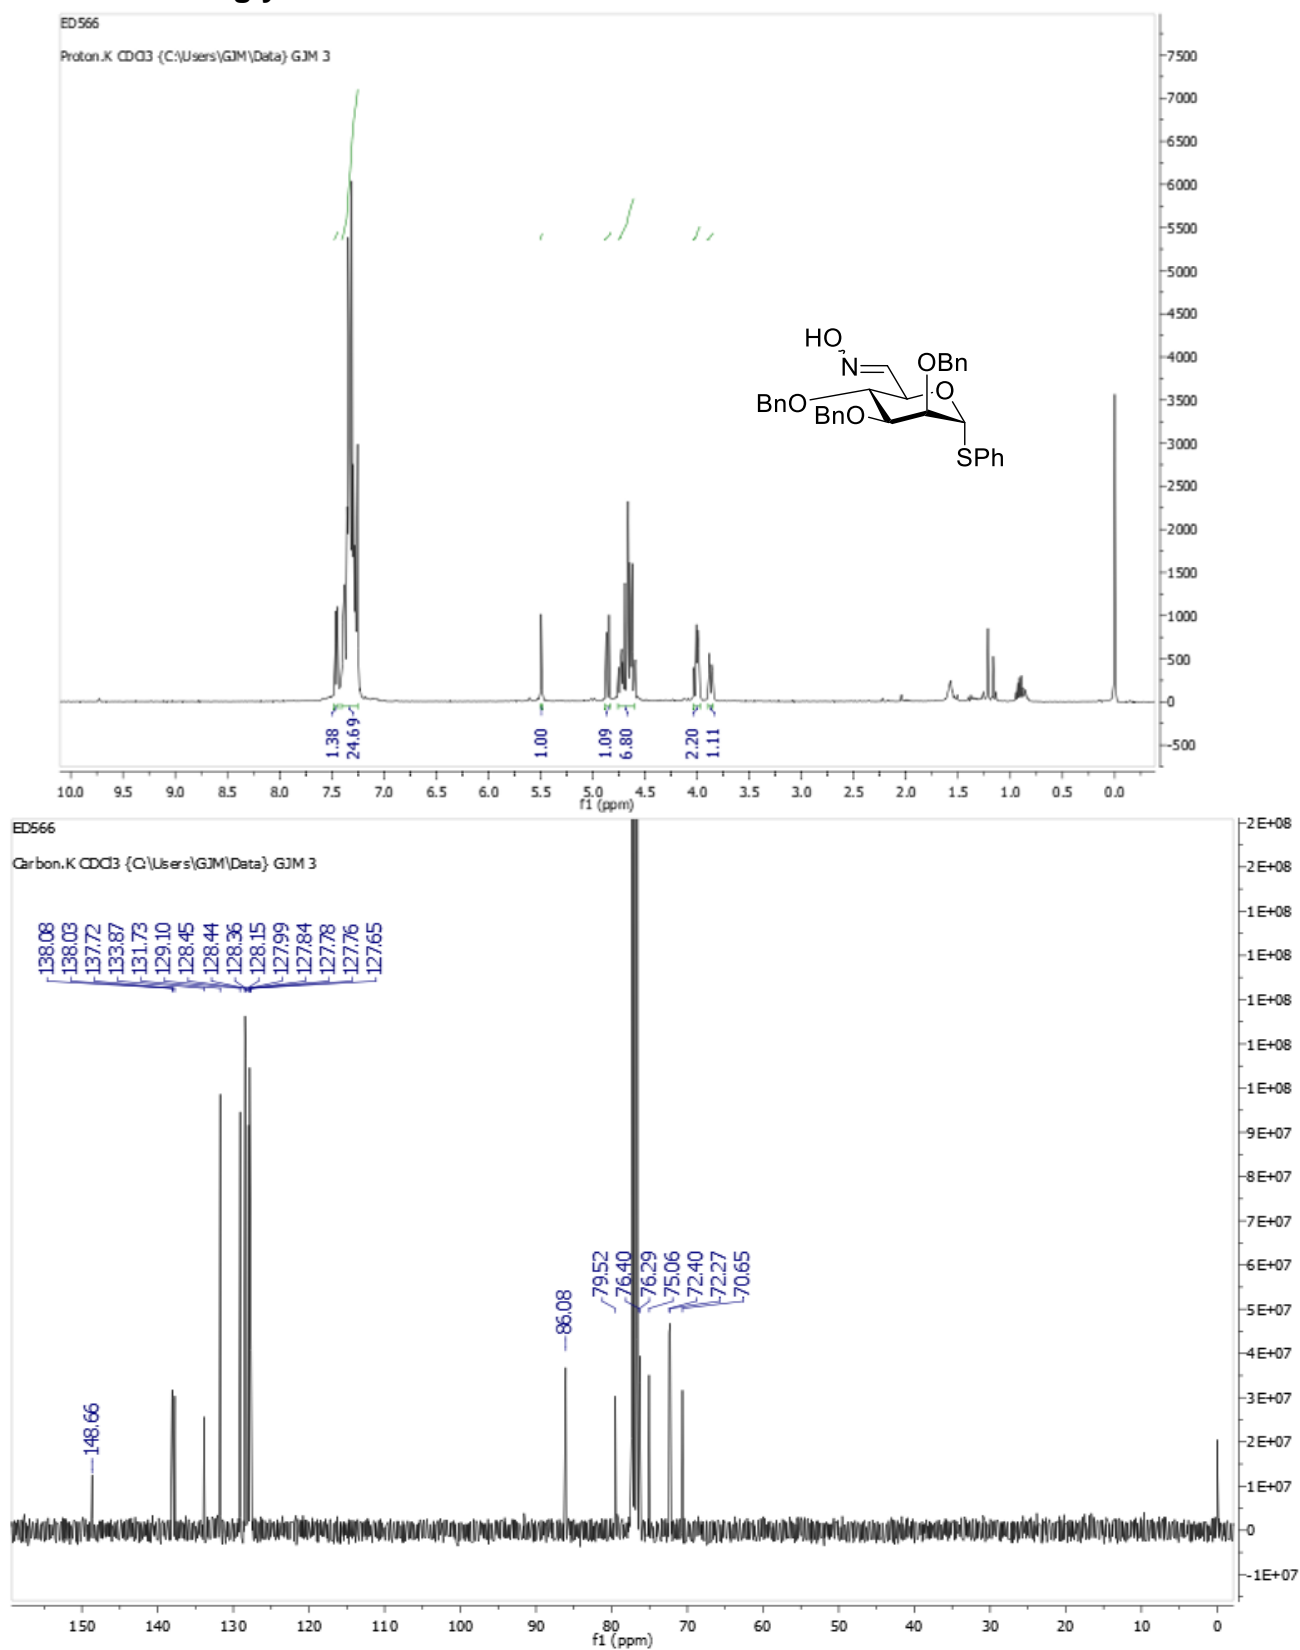

# C-6 nitrile thioglycoside 16

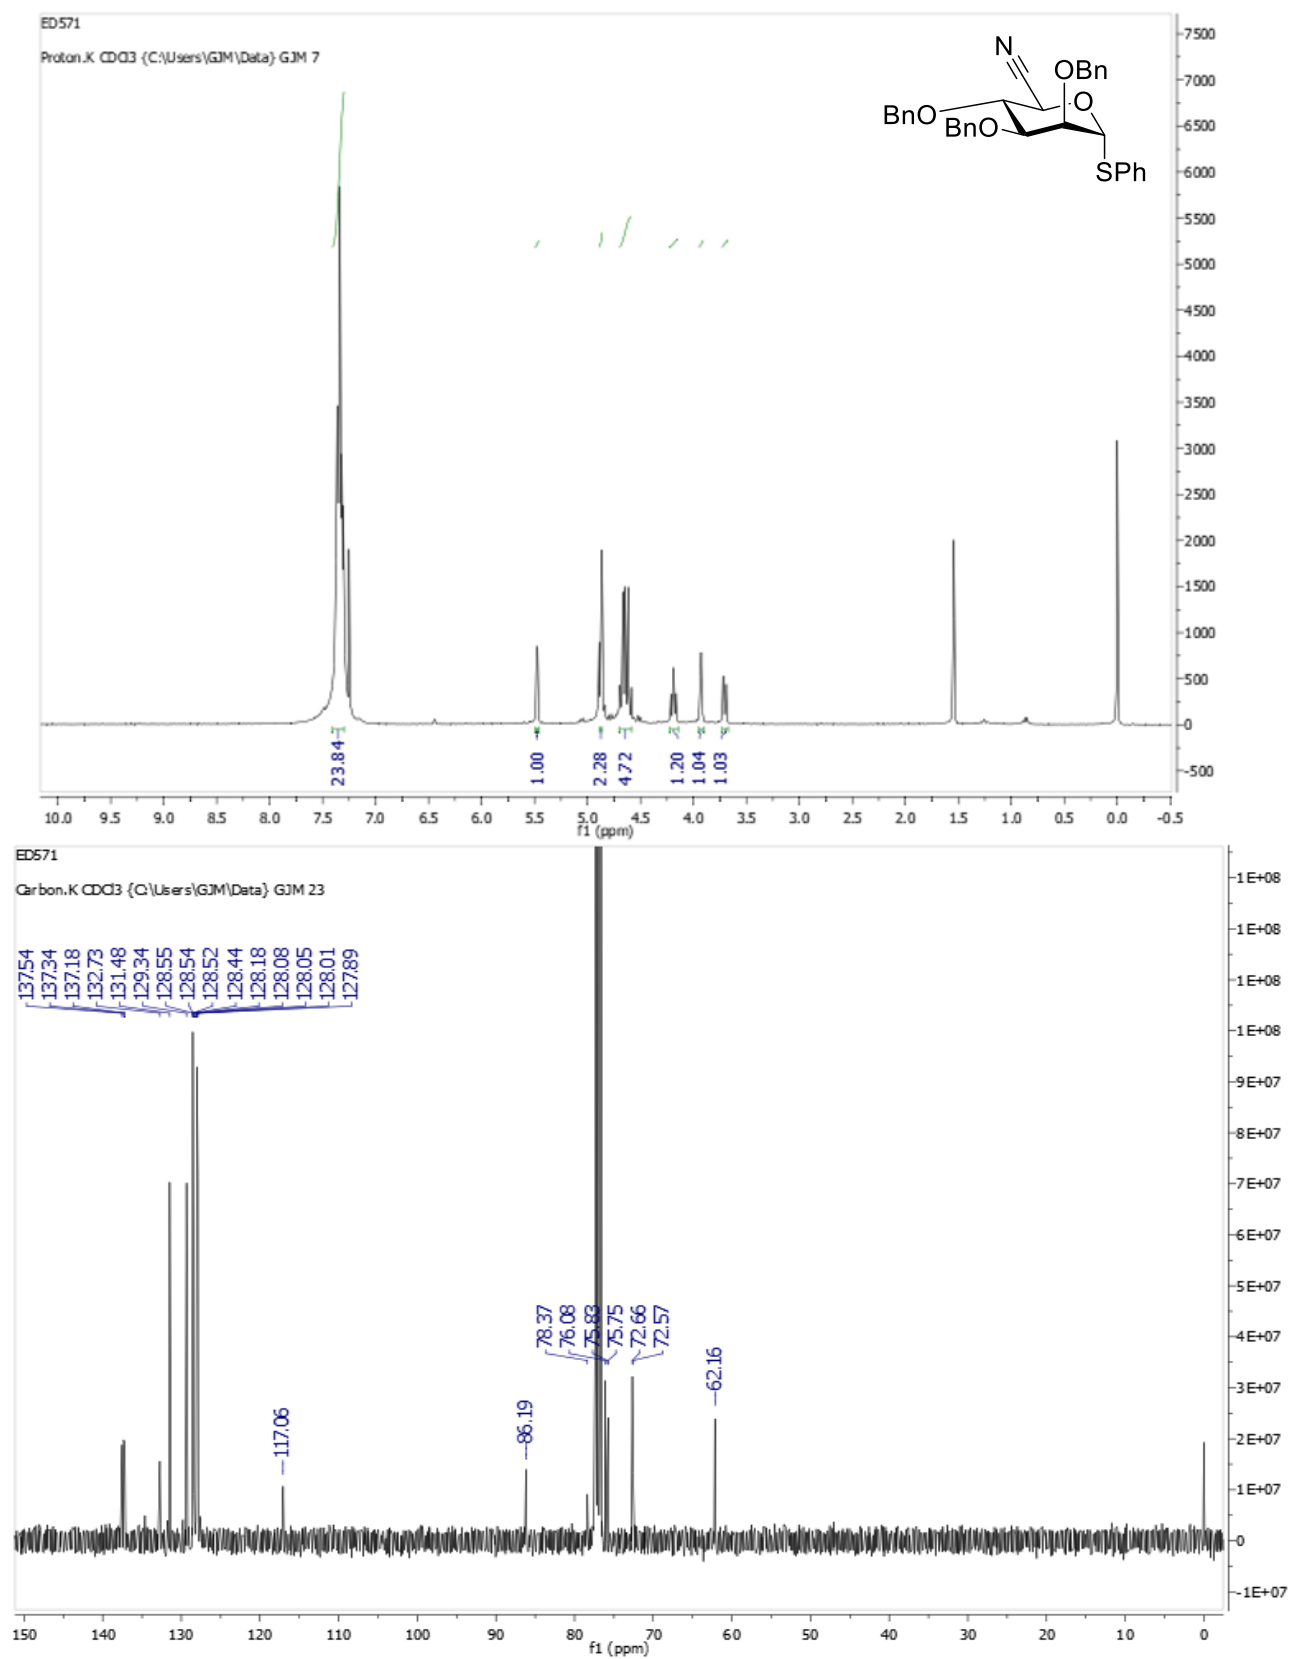

# Compound 17

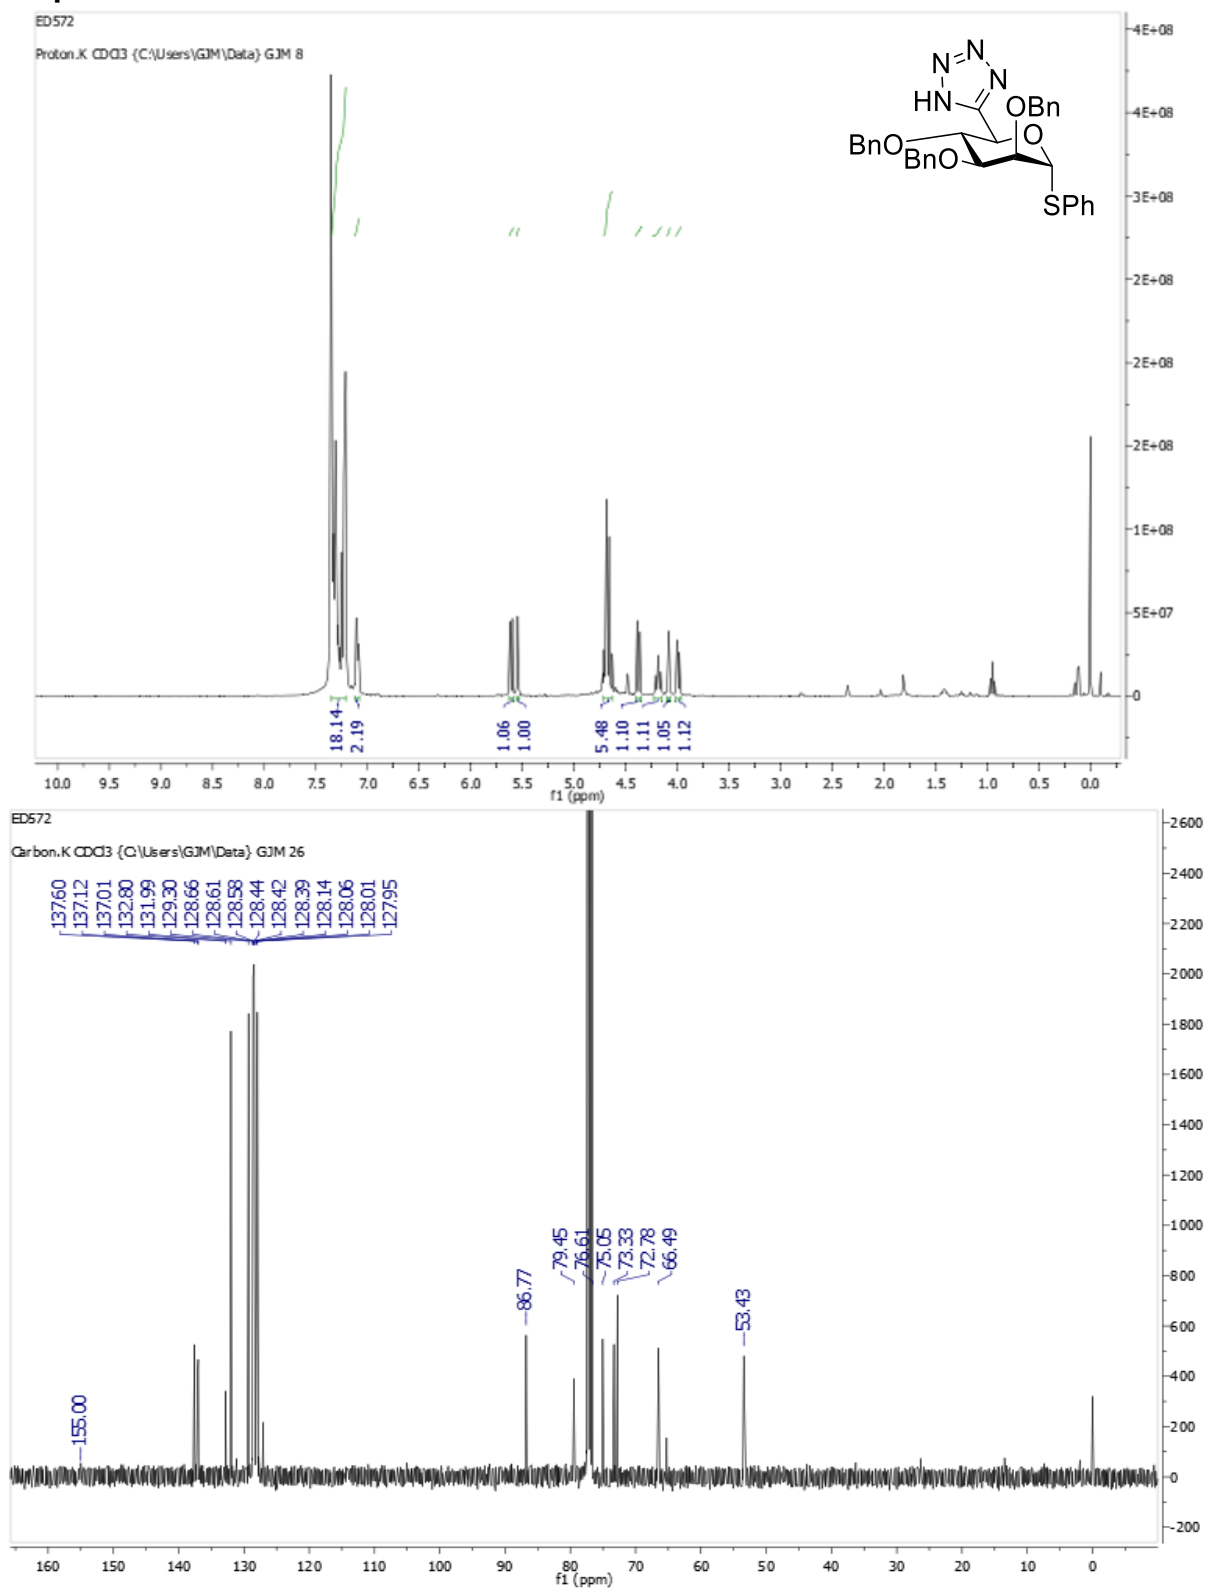

# Compound 18

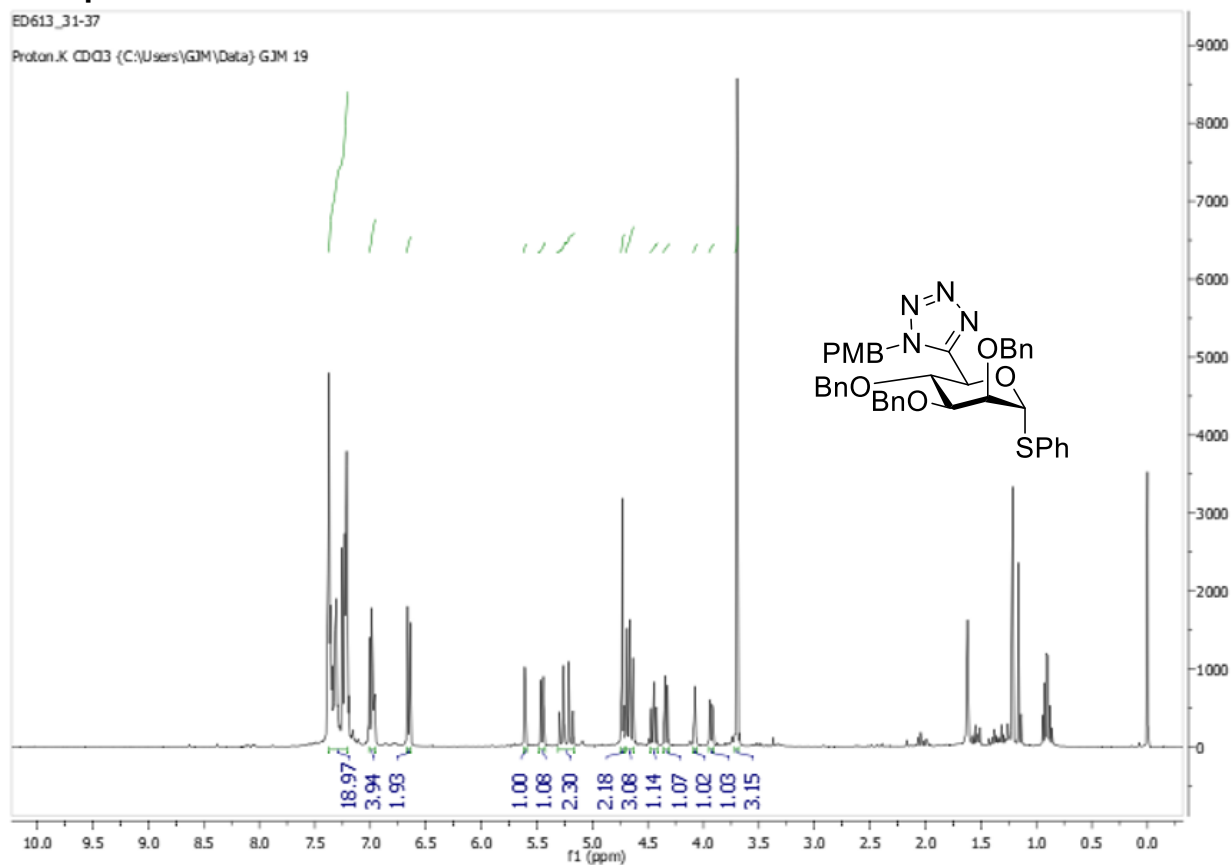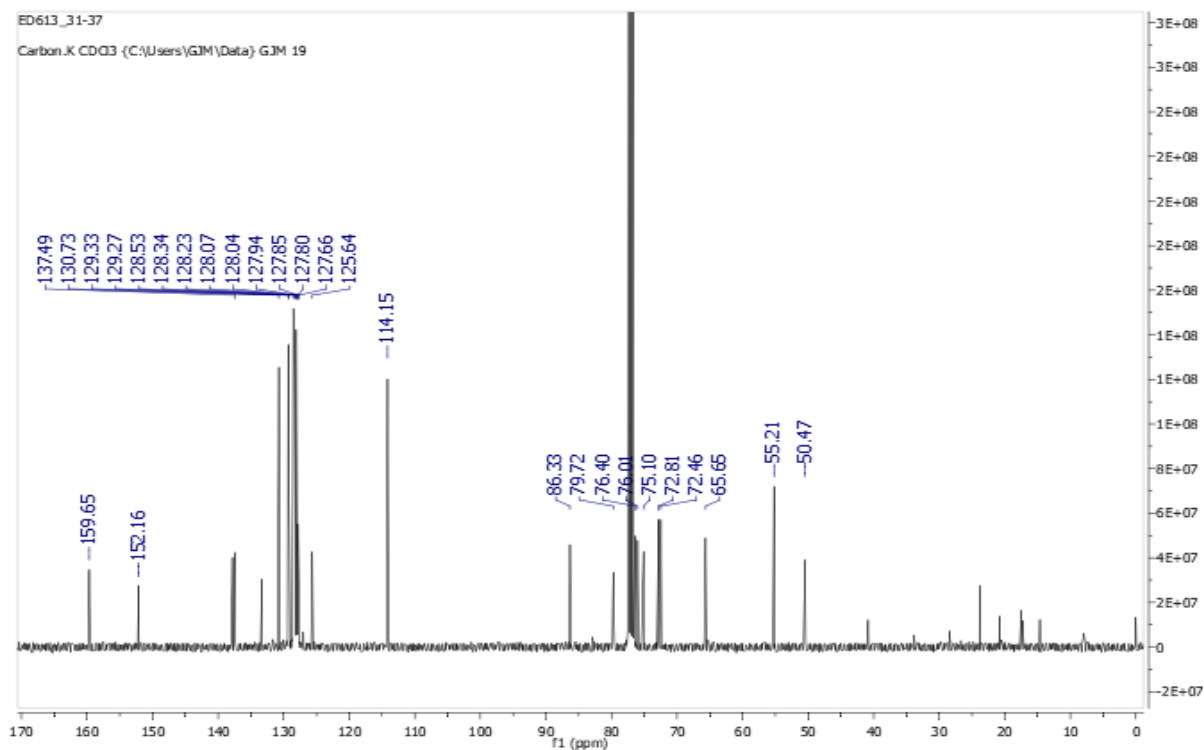



### Coupled HSQC of **N1-isomer**

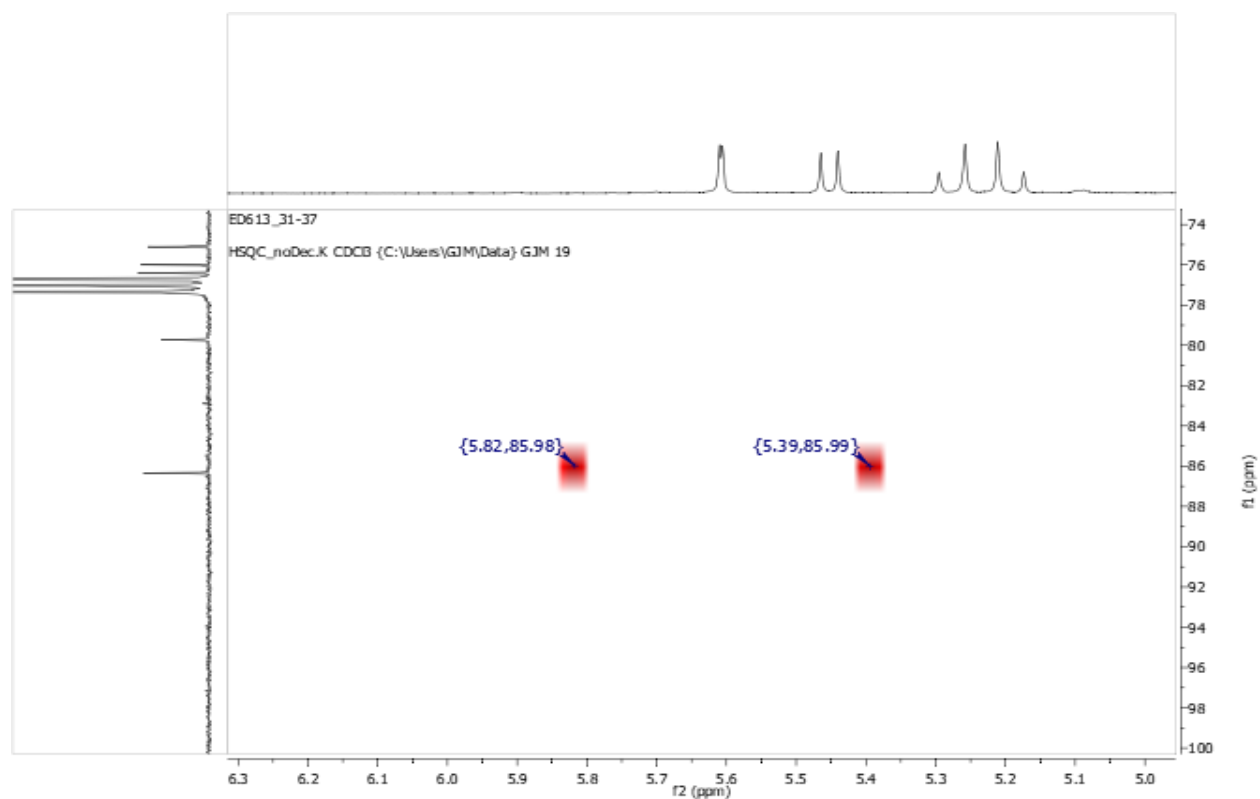

### Coupled HSQC of **N2-isomer**

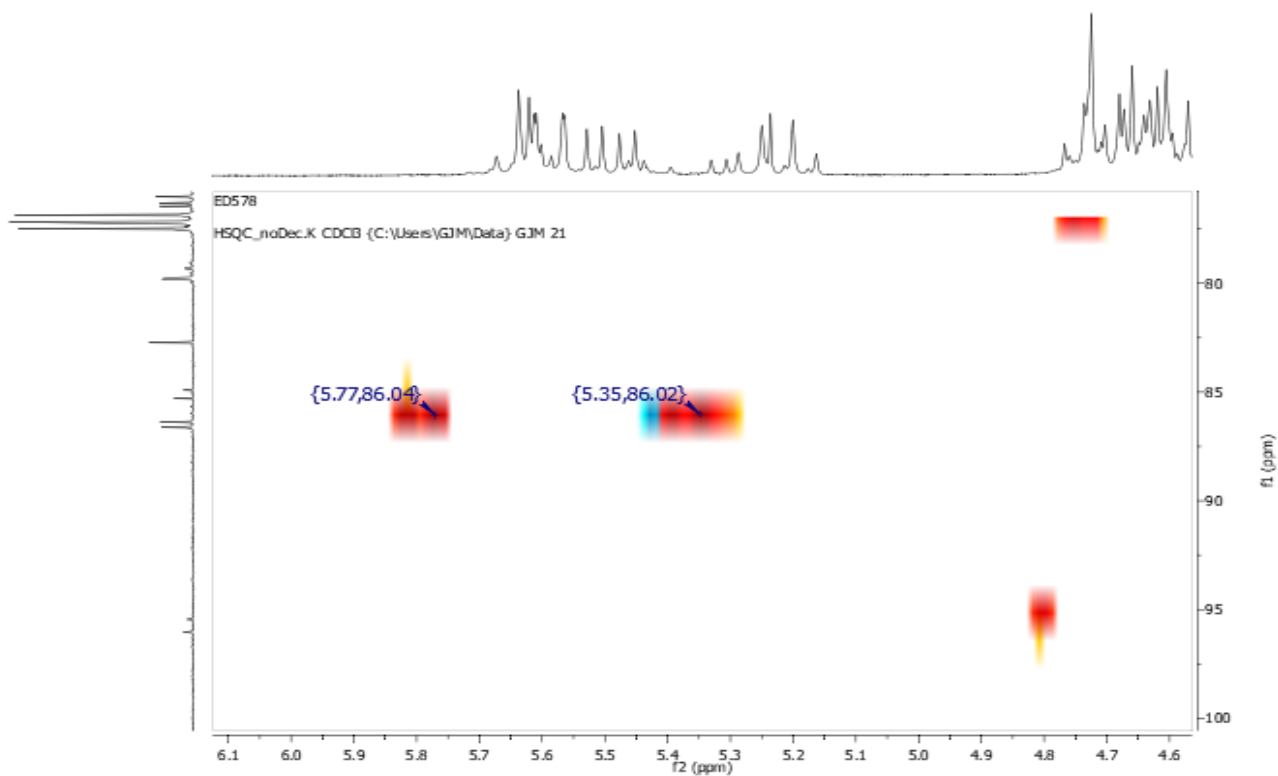

HMBC of both isomers

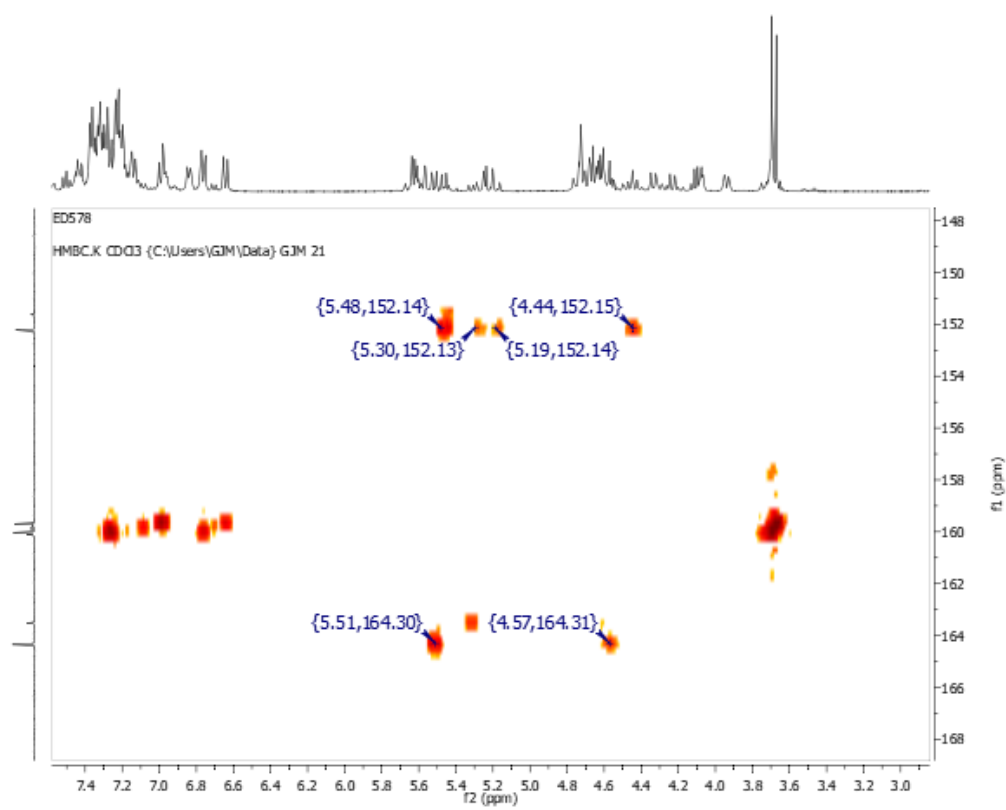

**3-(Benzyloxycarbonylamino)propyl (2,3,4-tri-O-benzyl-6-C-(2-para-methoxybenzyl-tetrazolyl)- $\alpha/\beta$ -D-lyxopyranoside**

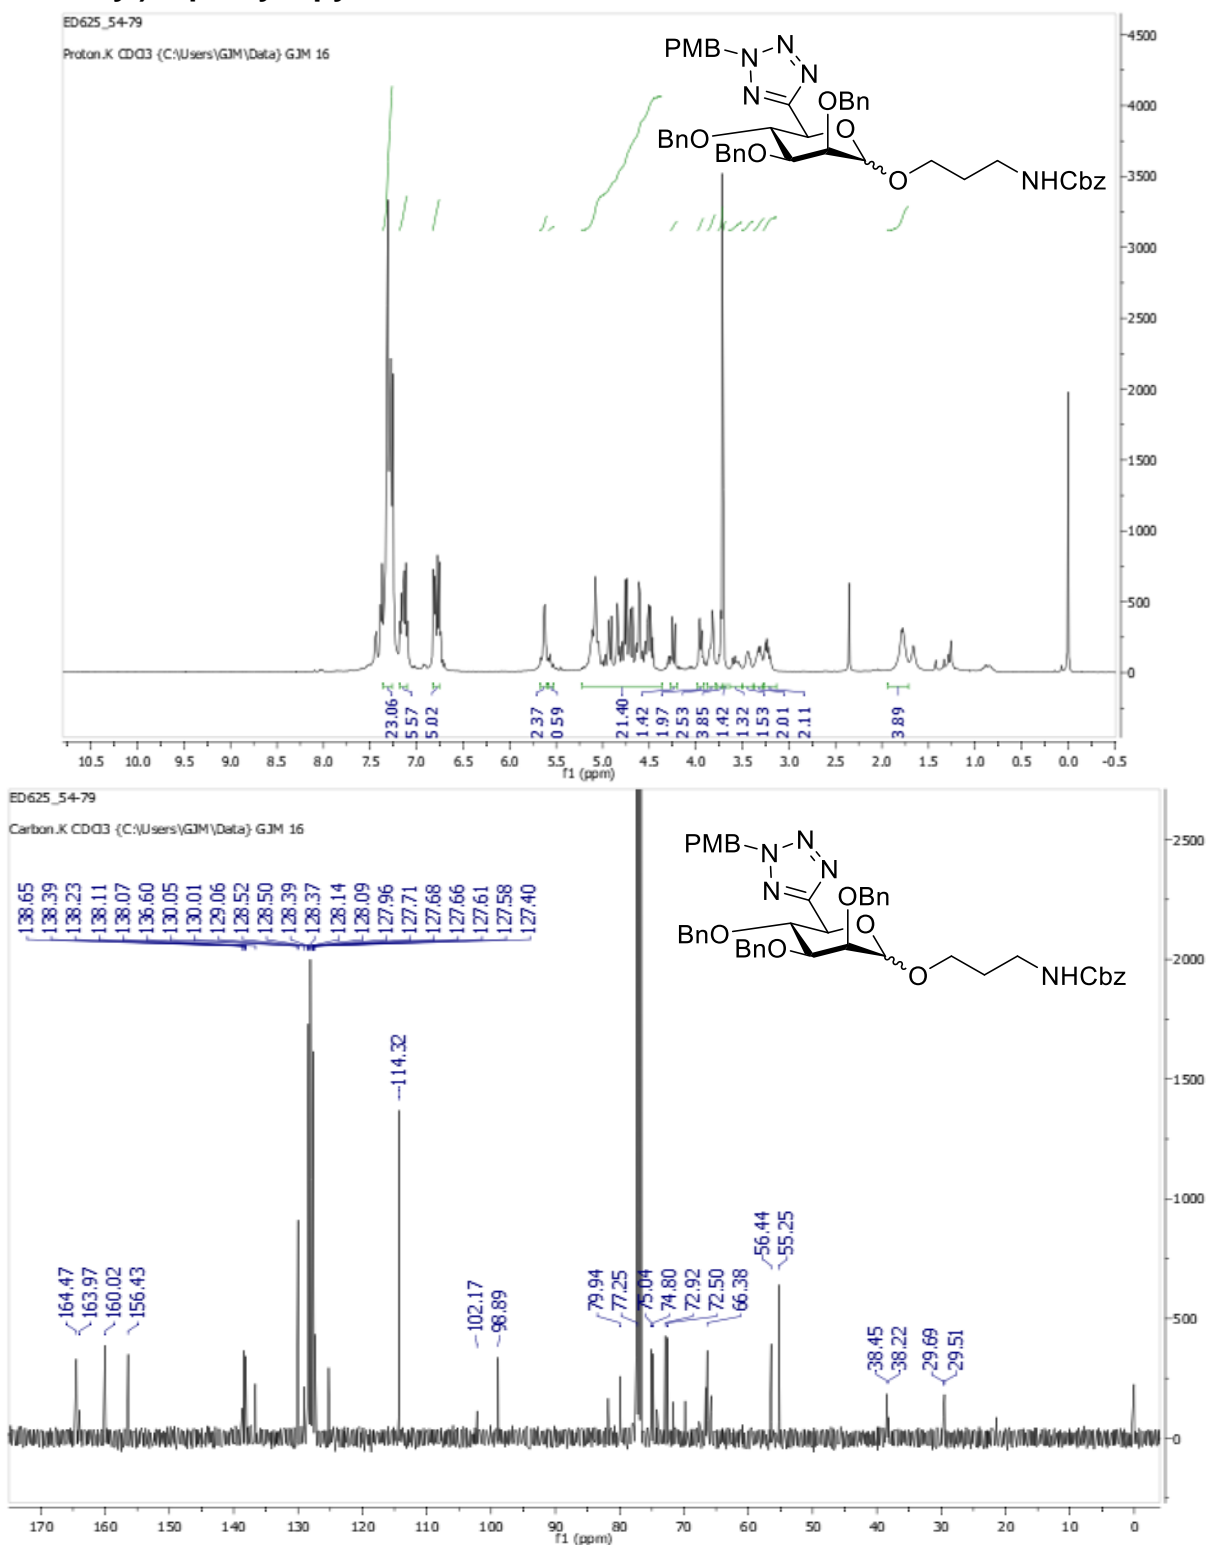

Coupled HSQC (showing only  $\beta$ -anomer  $^1J_{C1-H1}$  coupling)

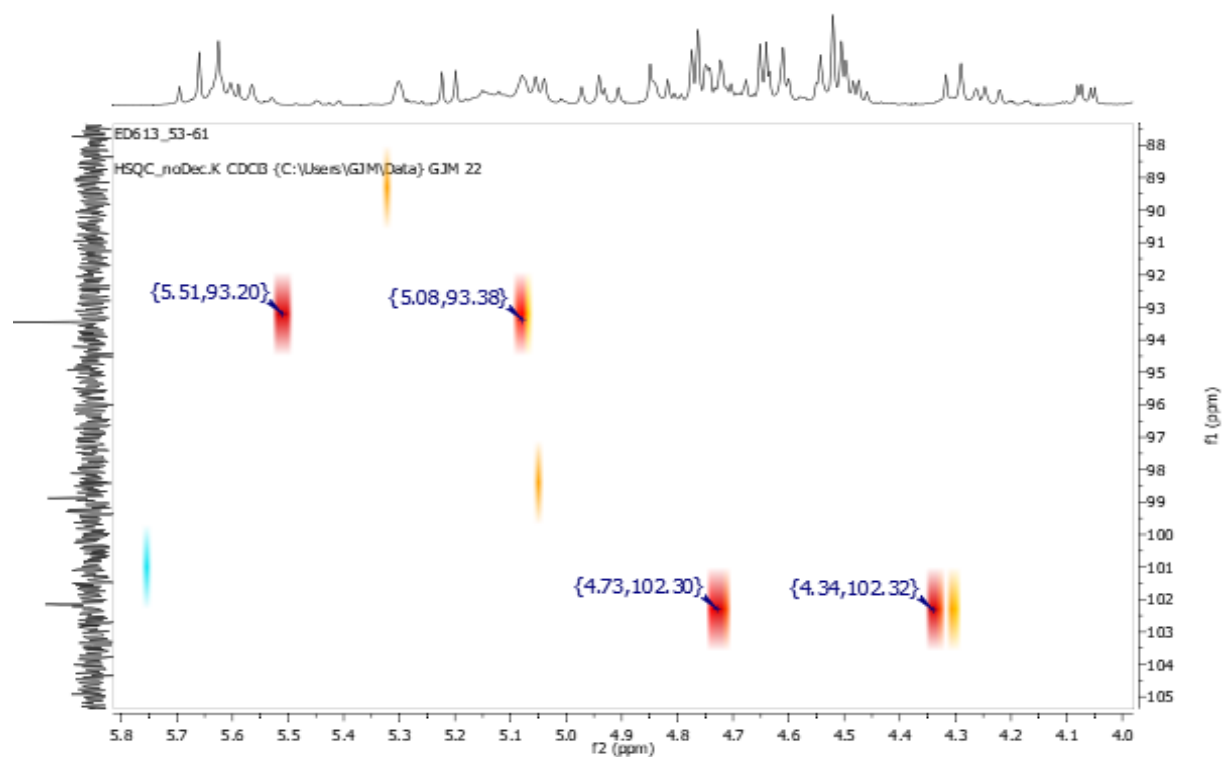

# Compound 20

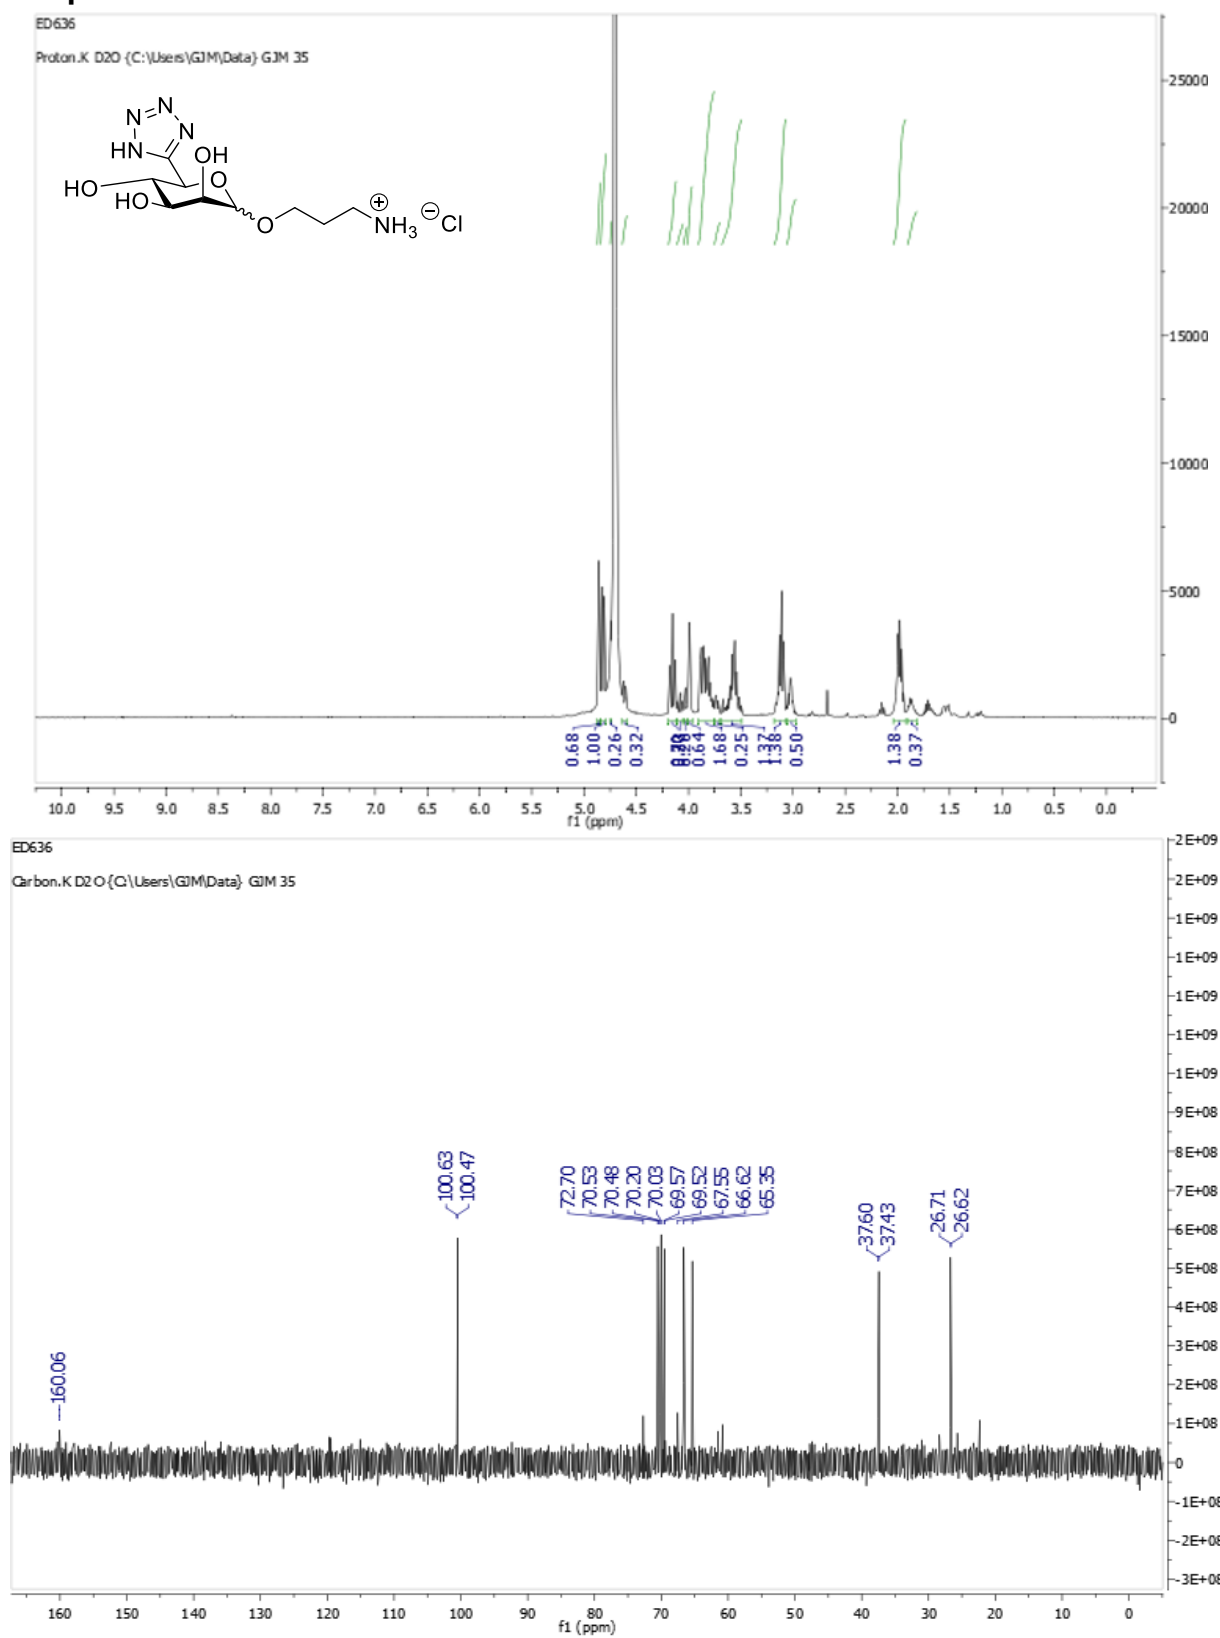

# Coupled HSQC

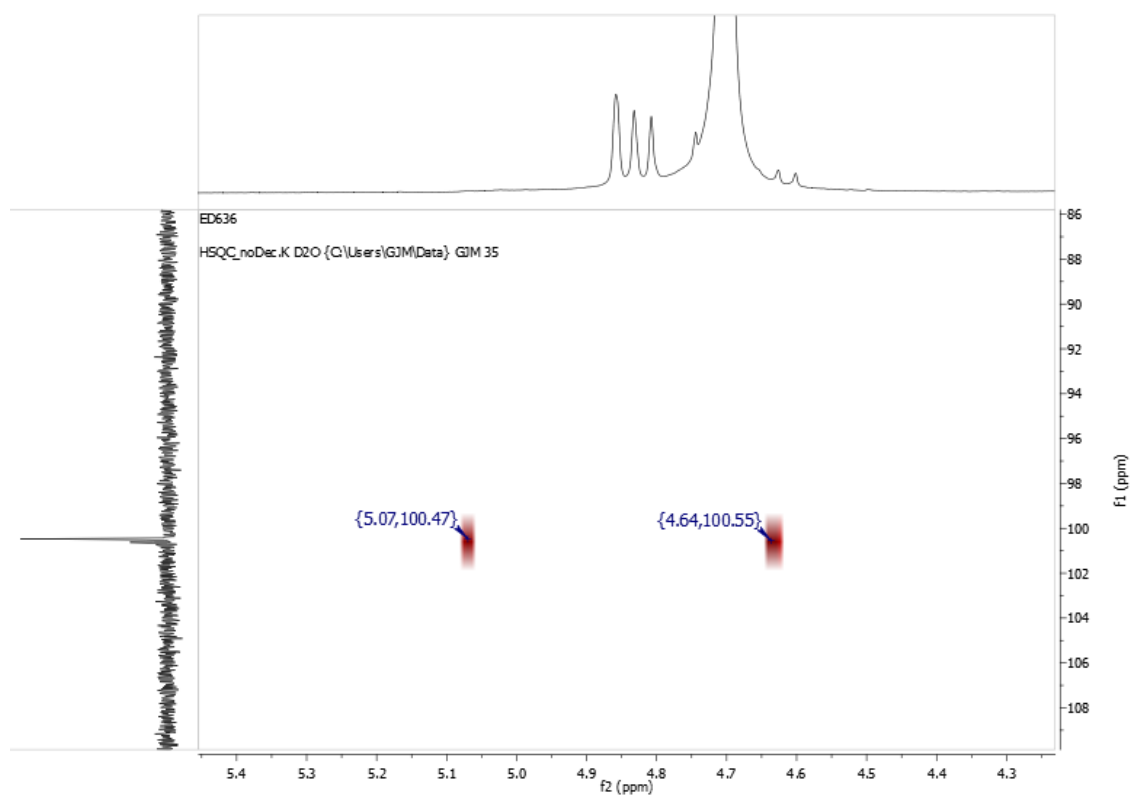

# Fully protected C6-tetrazole 1-phosphates

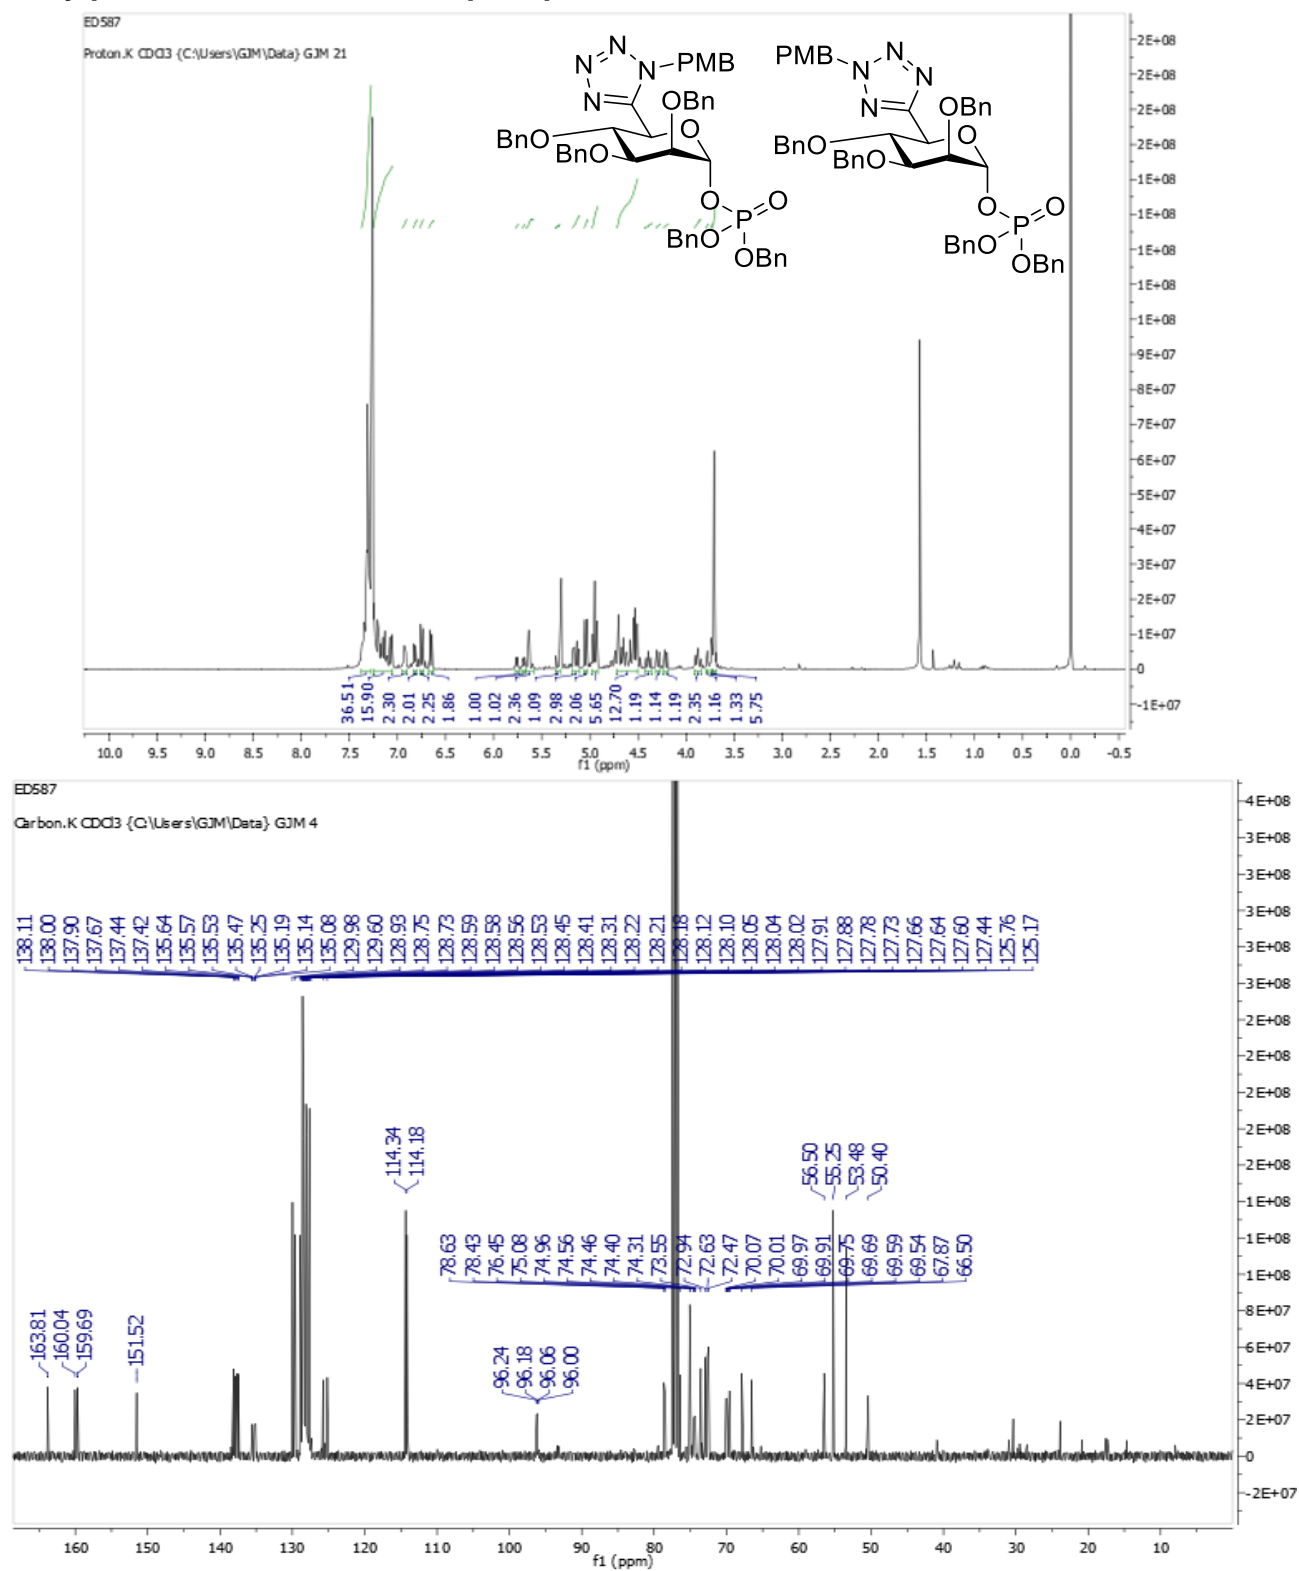



# $^{31}\text{P}$ NMR

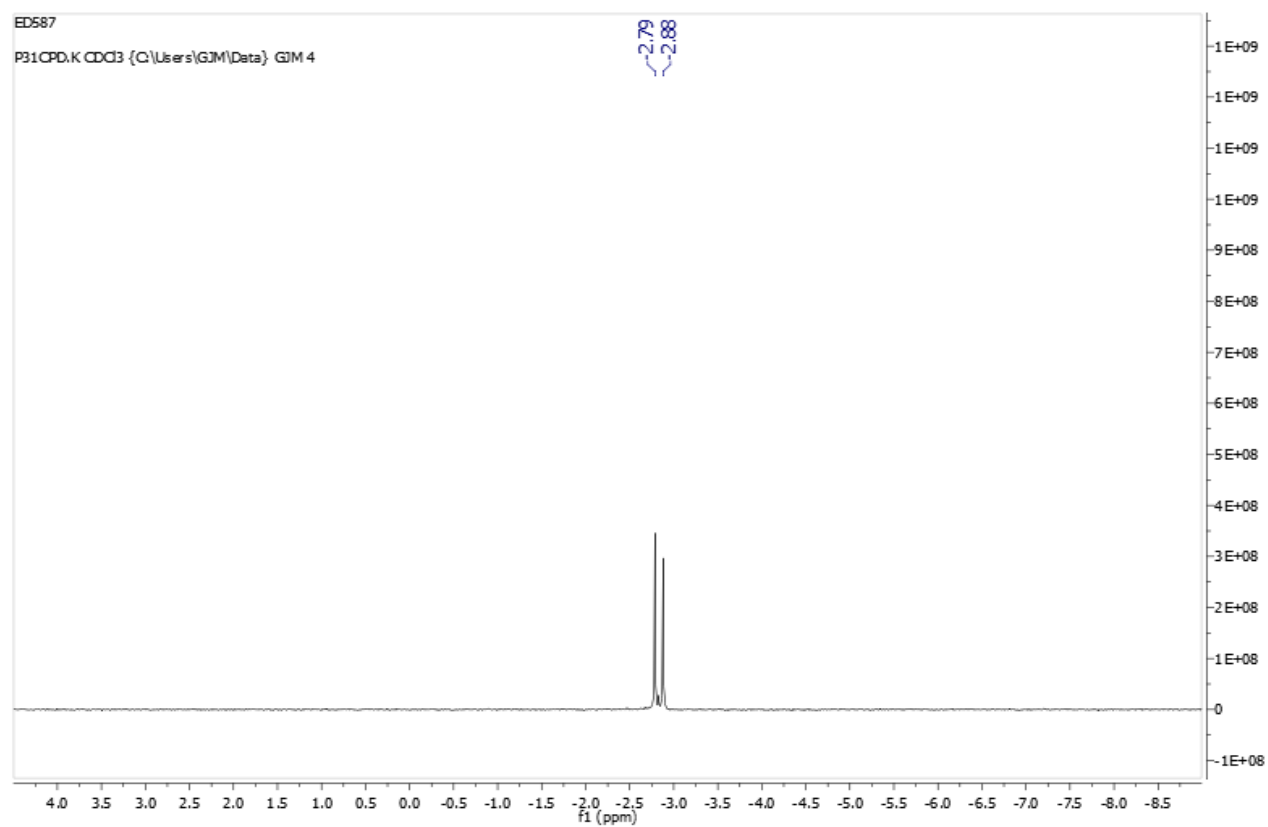

# Compound 21

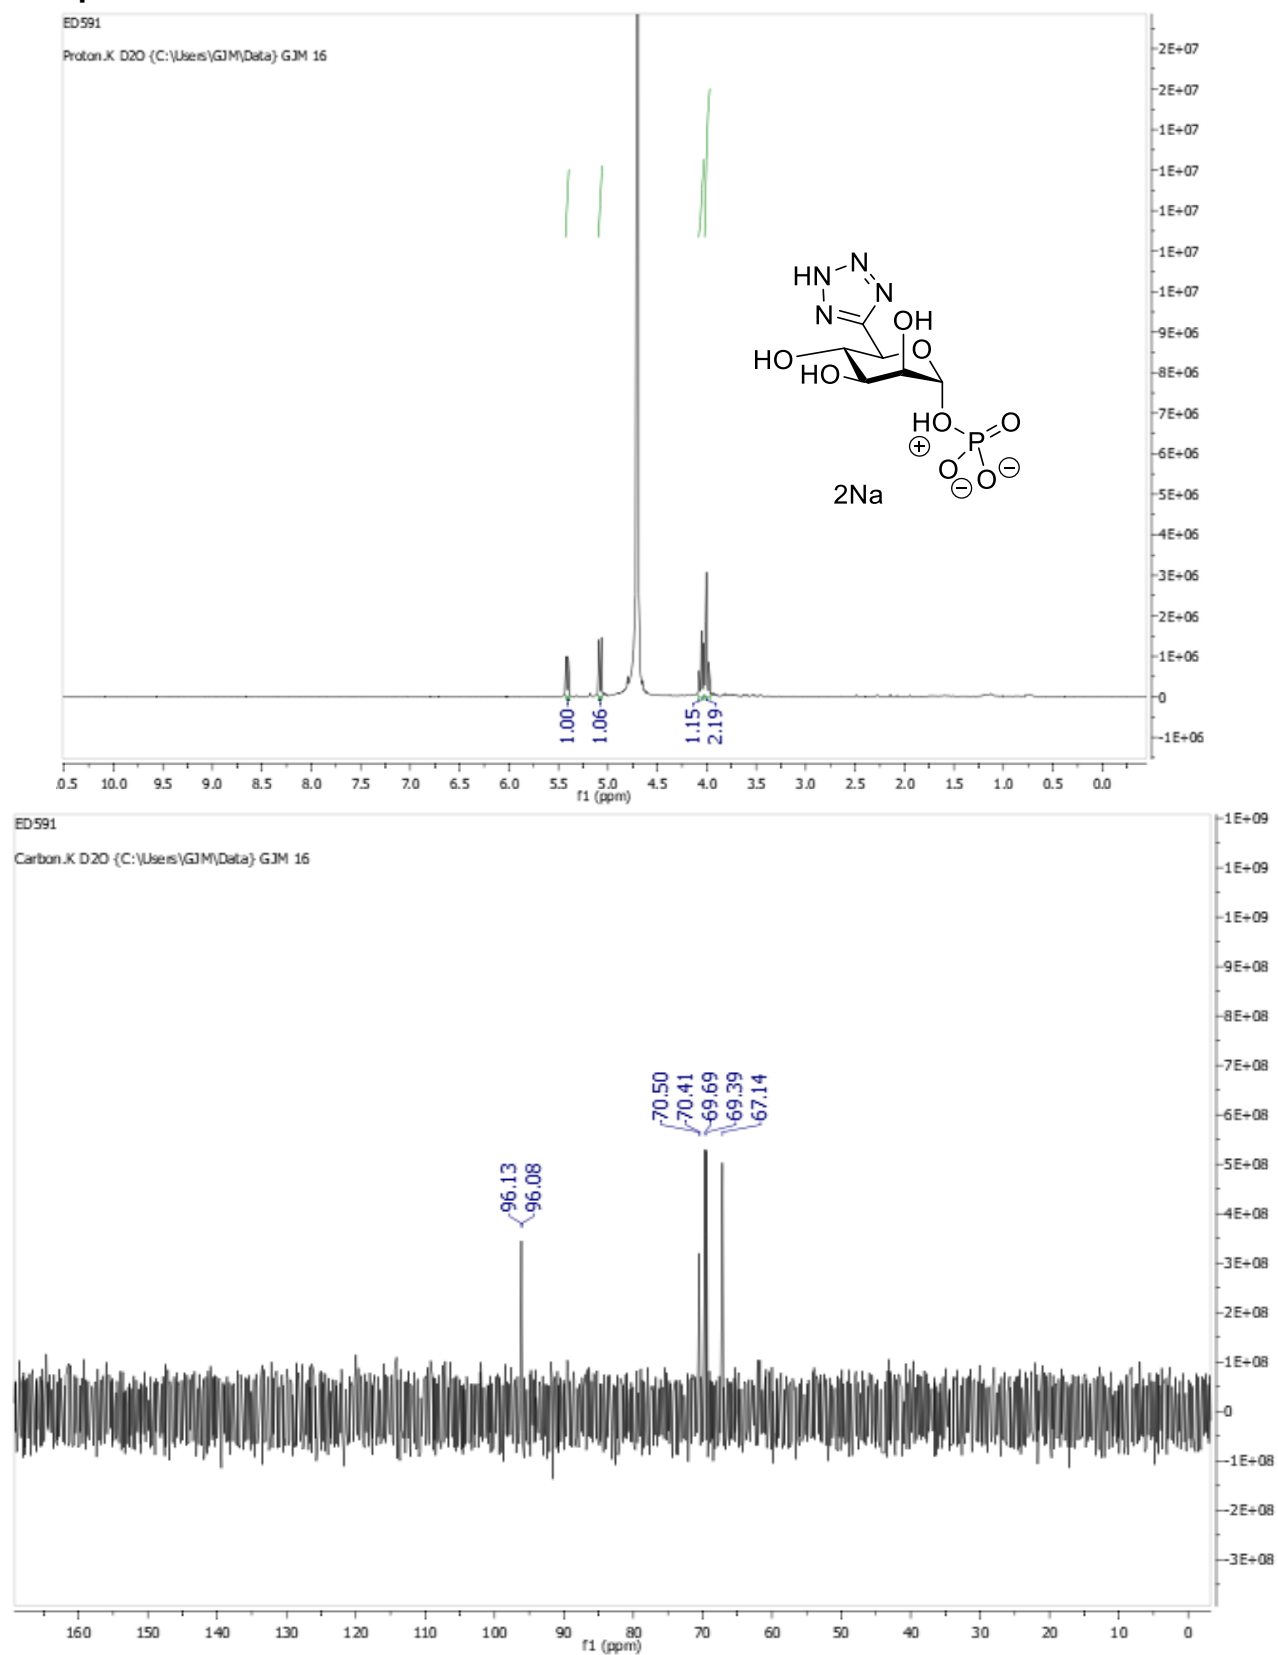

# $^{31}\text{P}$ NMR

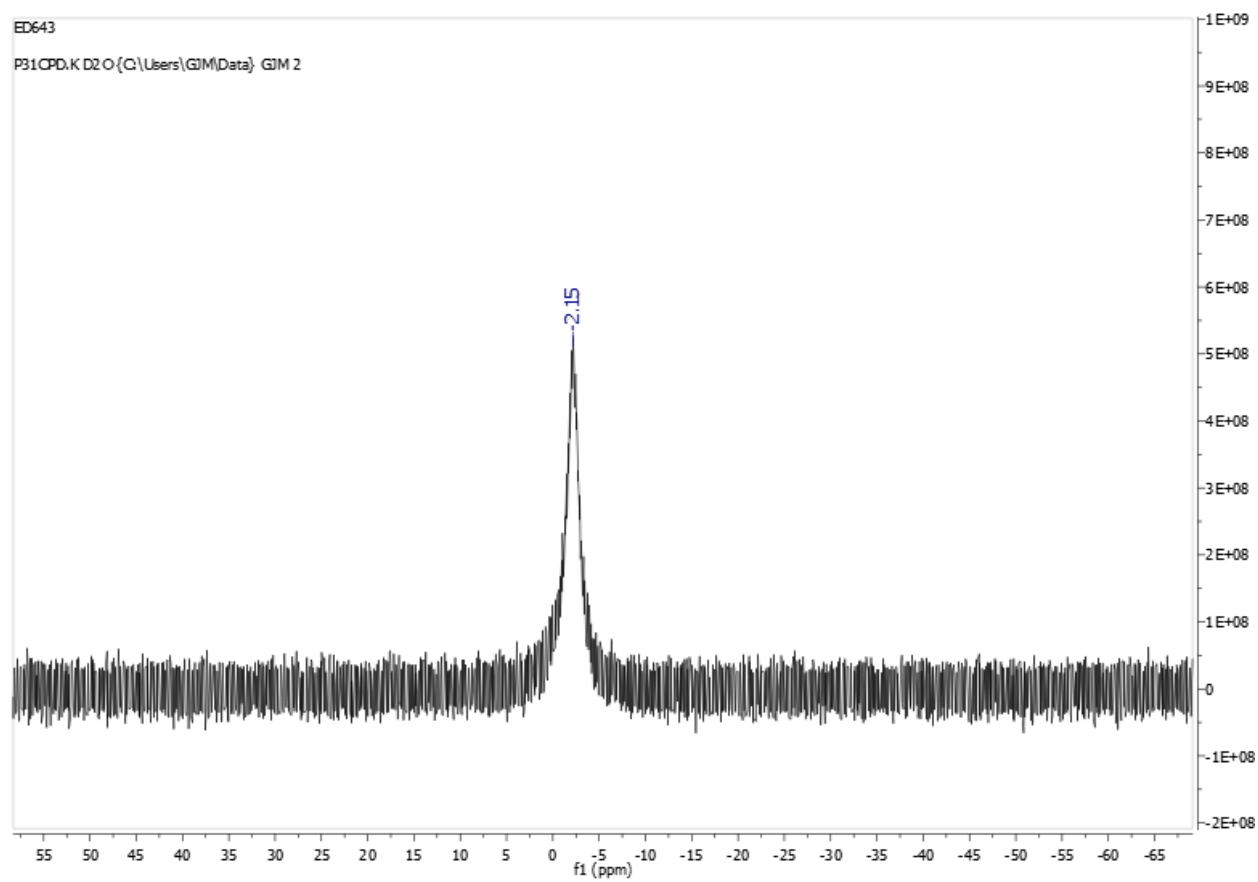

Supplement: Additional file 1 [file 1860-5397-17-110-S1.pdf]
